1 **Tumor-educated Gr1<sup>+</sup>CD11b<sup>+</sup> cells instigate breast cancer metastasis by twisting**  
2 **cancer cells plasticity via OSM/IL6–JAK signaling**

3  
4 Sanam Peyvandi<sup>1, +, \*</sup>, Manon Bulliard<sup>1, +</sup>, Annamaria Kauzlaric<sup>2</sup>, Oriana Coquoz<sup>1</sup>, Yu-Ting  
5 Huang<sup>1</sup>, Nathalie Duffey<sup>1, +</sup>, Laetitia Gafner<sup>1</sup>, Gireca Lorusso<sup>1</sup>, Nadine Fournier<sup>2</sup>, Qiang  
6 Lan<sup>1,3,\*,#</sup>, and Curzio Rüegg<sup>1,\*,#</sup>

7  
8 <sup>1</sup> Pathology Unit, Department of Oncology, Microbiology and Immunology (OMI), Faculty  
9 of Science and Medicine, University of Fribourg, 1700 Fribourg, Switzerland;

10 <sup>2</sup> Translational Data Science Group, Swiss Institute of Bioinformatics, Lausanne,  
11 Switzerland;

12 <sup>3</sup> Cell and Tissue Dynamics Research Program, Institute of Biotechnology, Helsinki  
13 Institute of Life Science (HiLIFE), University of Helsinki, Helsinki, Finland.

14

15 \* These authors contributed equally as corresponding authors.

16

17 + Current affiliations: S.P., Immunobiology Department, University of Lausanne (UNIL),  
18 Switzerland; M.B., Swiss Institute for Experimental Cancer Research (ISREC), Ecole  
19 Polytechnique Fédérale Lausanne (EPFL) UPCDA SV 2833 (Bâtiment SV) Lausanne,  
20 Switzerland; N.D., Department of Oncology, Centre Hospitalier Universitaire Vaudois  
21 (CHUV), University of Lausanne (UNIL), Switzerland; Y-T.H., Daiichi Sankyo Co., Ltd.  
22 Taipei City, Taiwan

23

24 # Lead contacts and co-senior authors:

25 # C.R. ([curzio.ruegg@unifr.ch](mailto:curzio.ruegg@unifr.ch); +4126 300 8766), Department of Oncology, Microbiology,  
26 Immunology, Faculty of Science and Medicine, University of Fribourg, Chemin du Musée  
27 18, Per 17, CH-1700 Fribourg, Switzerland

28 # Q.L. ([qiang.lan@helsinki.fi](mailto:qiang.lan@helsinki.fi)) Cell and Tissue Dynamics Research Program, Institute of  
29 Biotechnology, Helsinki Institute of Life Science (HiLIFE), Biocenter 2, P.O. Box 56,  
30 FIN-00014, University of Helsinki, Helsinki, Finland

31

32 **Conflict-of-interests:** The authors have no conflicts of interest to declare.

33 **Running title:** OMS/IL6 twist breast cancer plasticity to promote metastasis

34 **Keywords:** Breast cancer metastasis, chemotherapy, cancer stem cells, GR1, Oncostatin  
35 M, IL6, JAK, plasticity, heterogeneity

36

37 **Abstract**

38 Cancer cell plasticity contributes to tumor therapy resistance and metastasis formation,  
39 which represent the main causes of cancer-related death for most cancers, including  
40 breast cancer. The tumor microenvironment drives cancer cell plasticity and metastasis  
41 and, thus, unravelling the underlying cues may provide novel effective strategies to  
42 manage metastatic disease. Here, we show that stem cell antigen-1 positive (Sca-1<sup>+</sup>)  
43 murine breast cancer cells enriched during tumor progression and metastasis have higher  
44 *in vitro* cancer stem cell-like properties, enhanced *in vivo* metastatic ability, and initiate  
45 primary tumors rich in Gr1<sup>high</sup>CD11b<sup>+</sup>Ly6C<sup>low</sup> cells. In turn, tumor-educated Gr1<sup>+</sup>CD11b<sup>+</sup>  
46 (Tu-Gr1<sup>+</sup>CD11b<sup>+</sup>) cells rapidly and transiently convert low metastatic 4T1-Sca-1<sup>-</sup> cells into  
47 highly metastatic 4T1-Sca-1<sup>+</sup> cells via secreted OSM and IL6. Moreover, chemotherapy-  
48 resistant and highly metastatic 4T1-derived cells maintain high Sca-1<sup>+</sup> frequency through  
49 cell autonomous IL6 production. Inhibition of OSM, IL6 or JAK suppressed Tu-  
50 Gr1<sup>+</sup>CD11b<sup>+</sup>-induced Sca-1<sup>+</sup> population enrichment *in vitro*, while JAK inhibition abrogated  
51 metastasis of chemotherapy-enriched Sca-1<sup>+</sup> cells *in vivo*. Importantly, Tu-Gr1<sup>+</sup>CD11b<sup>+</sup>  
52 cells invoked a gene signature in tumor cells predicting shorter OS and RFS in breast  
53 cancer patients. Collectively, our data identified OSM/IL6-JAK as a clinically relevant  
54 paracrine/autocrine axis instigating breast cancer cell plasticity triggering metastasis.

55

## 56 **Introduction**

57 Metastasis accounts for over 90% of cancer-related death, calling for new strategies to  
58 prevent cancer cell dissemination and metastasis formation (1). Recent studies using  
59 single-cell lineage tracing and single-cell RNA sequencing (scRNA-seq) technologies have  
60 provided detailed information about intratumor heterogeneity (2, 3), whereby genetically,  
61 epigenetically and functionally diverse subpopulations of cancer cells exist within the tumor  
62 mass, spatially and temporally (4). Intratumor heterogeneity may arise by modulating  
63 cancer cell plasticity, especially of cancer stem cells (CSCs), through cell-intrinsic and -  
64 extrinsic mechanisms (5, 6).

65 Multiple CSC subpopulations appear to co-exist within the primary tumor mass  
66 resulting in high degree of tumor cell heterogeneity and increased aggressiveness (7)  
67 including in breast cancer (4, 8–11). In particular, CSCs can acquire metastasis initiating  
68 capacities (12) and resistance to therapy, resulting in cancer relapse (4). Moreover, non-  
69 CSCs within the tumor bulk may acquire CSC properties to repopulate the tumor(4). While  
70 CSC are defined rather functionally by their ability to initiate tumors and metastasis in low  
71 number *in vivo*, several cell surface markers associated with CSC features have been  
72 reported, including CD44, CD24, Sca-1, CD61, CD49f were used to identify breast CSCs  
73 (13, 14).

74 The interaction of tumor cells with the tumor microenvironment (TME) contributes to  
75 tumor cell plasticity and tumor heterogeneity (15, 16). Cells of the TME also promote tumor  
76 escape and metastasis through multiple mechanisms, including promotion of  
77 angiogenesis, cell survival, invasion, epithelial-mesenchymal transition (EMT), and  
78 immunosuppression (17–22). Recently, they have been reported to instigate expansion of  
79 CSC with metastatic ability (also known as metastasis-initiating cells) in different cancers  
80 (17, 23, 24). Thus, the TME dynamics is a key driver of cancer cell plasticity and

81 heterogeneity promoting tumor growth, progression and metastasis (4). Accurate  
82 characterization of the regulation of tumor plasticity and heterogeneity by the TME may  
83 reveal novel opportunities for developing effective anti-metastatic therapies (8, 14).

84 TME-derived Oncostatin M (OSM) has been shown to mediate tumor progression  
85 and CSC stemness by activating its receptor OSMR (25). OSM belongs to the IL6 family  
86 of cytokines (including IL6 itself, IL11 and LIF) (26, 27), whose members bind to dimeric  
87 receptors sharing a common subunit (gp130 or IL6ST) and activate JAK-STAT, RAS-  
88 MAPK and PI3K-AKT pathways (28, 29). Increased OSM or IL6 expression correlates with  
89 reduced survival in breast cancer patients (30, 31). OSM was shown to drive breast cancer  
90 progression and metastasis through direct effects on cancer cells, such as suppression of  
91 estrogen receptor (ER) expression (31) and promotion of EMT (25, 32), and indirect effects  
92 via TME cells, in particular the reprogramming of tumor associated macrophages and  
93 fibroblasts (33–36).

94 Here, by assessing the metastatic evolution of murine triple-negative breast cancer  
95 (TNBC) models *in silico* and *in vivo*, we observed that the Sca-1<sup>+</sup> tumor cell subpopulation  
96 is enriched during tumor progression. We show that tumor-educated Gr1<sup>+</sup>CD11b<sup>+</sup> cells  
97 (Tu-Gr1<sup>+</sup>CD11b<sup>+</sup>), but not naïve Gr1<sup>+</sup>CD11b<sup>+</sup> cells from spleen (Spl-Gr1<sup>+</sup>CD11b<sup>+</sup>) or bone  
98 marrow (BM-Gr1<sup>+</sup>CD11b<sup>+</sup>) in tumor-bearing mice, modulate tumor plasticity via OSM/IL6-  
99 JAK signaling by rapidly and transiently converting 4T1-Sca-1<sup>-</sup> cells into 4T1-Sca-1<sup>+</sup> cells  
100 with high metastatic capacity. Prolonged exposure of 4T1 cells to chemotherapy stably  
101 enriched for metastatic Sca-1<sup>+</sup> cells via an autocrine IL6-JAK signaling loop. A short *in vitro*  
102 treatment of these chemo-resistant cells with the JAK inhibitor Ruxolitinib, suppressed their  
103 metastatic capacity. Importantly, Tu-Gr1<sup>+</sup>CD11b<sup>+</sup> invoked a gene expression signature in  
104 4T1 cells that predicted shorter overall survival (OS) and relapse-free survival (RFS) in  
105 breast cancer patients, reinforcing the clinical relevance of these findings.

106 Our results reveal a novel mechanism modulating tumor plasticity and triggering the  
107 emergence of cancer cells with enhanced metastatic capacity, through paracrine (Tu-  
108 Gr1<sup>+</sup>CD11b<sup>+</sup>-mediated) and cell autonomous (chemotherapy-induced) OSM/IL6-JAK  
109 dependent signaling. The OSM/IL6-JAK axis may be considered as a candidate of  
110 actionable clinical targets to impinge on metastatic progression and therapy resistance.

111

## 112 **Results**

### 113 **A Sca-1<sup>+</sup> tumor cell population is enriched during tumor progression and has higher** 114 ***in vivo* metastatic capacity**

115 To investigate tumor cell heterogeneity during tumor progression, we first examined the  
116 expression of the previously reported breast CSC markers CD24, CD44, CD61, Sca-1 and  
117 CD49f (13) in the publicly available RNA sequencing (RNAseq) dataset from Ross *et al.*  
118 encompassing several murine breast cancer models (37). This dataset includes data from  
119 cultured cancer cells (In\_Culture), orthotopic primary tumors (OT\_PT), spontaneous lung  
120 metastases (OT\_LuM), and experimental lung metastases after tail vein injection  
121 (TV\_LuM) (Figure 1A and Supplemental Figure 1A). *Sca-1* expression was elevated in lung  
122 metastasis in 4T1, 6DT1, Mvt1 and Met1 models compared with the respective primary  
123 tumors. Interestingly, in 4T1, 6DT1 and Mvt1 models, *Sca-1* expression was also elevated  
124 in experimental lung metastases compared with cultured cells. However, the expression of  
125 *Cd24*, *Cd44*, *Cd61* and *Cd49f* were not altered, or their expression pattern was inconsistent  
126 during progression (Supplemental Figure 1A). Thus, increased *Sca-1* expression during  
127 metastasis is consistently observed in different preclinical breast cancer models.

128 To investigate whether the increased *Sca-1* expression within the tumor mass was  
129 due to an increased gene expression in all cancer cells or to the enrichment of a Sca-1<sup>+</sup>  
130 population, we orthotopically injected 4T1 tumor cells and determined the frequency of

131 different cell populations present in the primary tumor and lung metastases 30 days later  
132 by flow cytometry (Figure 1B). We observed that the frequency of both Sca-1<sup>+</sup> and CD61<sup>+</sup>  
133 populations increased in lung metastases compared to primary tumors (Figure 1C). In  
134 contrast, the CD24<sup>+</sup>, CD44<sup>+</sup> and CD49f<sup>+</sup> populations were not significantly altered.

135 The enrichment of the Sca-1<sup>+</sup> population in lung metastases prompted us to ask  
136 whether Sca-1<sup>+</sup> cells actively contribute to the metastasis. To this end, we isolated 4T1-  
137 Sca-1<sup>+</sup> and 4T1-Sca-1<sup>-</sup> cells by magnetic activated cell sorting (MACS) from parental 4T1  
138 cells, which contains low frequency of Sca-1<sup>+</sup> population (10-15%) (Supplemental Figure  
139 1B, C), and examined their metastatic ability *in vivo*. In the orthotopic injection model, 4T1-  
140 Sca-1<sup>+</sup> cells formed significantly more lung metastases than 4T1-Sca-1<sup>-</sup> cells, while there  
141 was no significant difference in primary tumor growth (Figure 1D-F). Upon tail vein injection,  
142 4T1-Sca-1<sup>+</sup> cells displayed significantly greater lung colonization ability compared to 4T1-  
143 Sca-1<sup>-</sup> cells and a non-significant increase compared to parental 4T1 cells (Figure 1G-I).  
144 In addition, 4T1-Sca-1<sup>+</sup> cells showed significantly higher *in vitro* mammosphere forming  
145 efficiency than 4T1-Sca-1<sup>-</sup> cells (Supplemental Figure 2A), while *in vitro* cell growth and  
146 cell motility were comparable (Supplemental Figure 2B-C).

147 These results suggest that 4T1-Sca-1<sup>+</sup> and 4T1-Sca-1<sup>-</sup> cells have similar tumorigenic  
148 potential, while 4T1-Sca-1<sup>+</sup> cells have higher metastasis-initiating capacity.

149

### 150 **The Sca-1<sup>+</sup> tumor cell population is plastic *in vitro* and *in vivo***

151 Growing evidence indicates that cancer cells possess plastic features, which can be  
152 modulated by both cell-intrinsic factors and microenvironmental cues (37, 38). To  
153 characterize the observed plasticity of 4T1-Sca-1<sup>+</sup> cells, we first investigated isolated 4T1-  
154 Sca-1<sup>+</sup> and 4T1-Sca-1<sup>-</sup> cells *in vitro*. The abundance of Sca-1<sup>+</sup> population in 4T1-Sca-1<sup>+</sup>  
155 cells enriched by MACS sorting (> 75%) gradually decreased to 50% after 4 days of culture

156 (Supplemental Figure 2D, upper panel), while the Sca-1<sup>-</sup> cells (negatively enriched by  
157 MACS) regenerated a Sca-1<sup>+</sup> population (from less than 1% to 19%) (Supplemental Figure  
158 2E, lower panel). Consistently, after orthotopic injection of 4T1-Sca-1<sup>+</sup> cells, the abundance  
159 of the Sca-1<sup>+</sup> population in the derived tumors decreased from 75% to about 40% after 23  
160 days of growth, while in tumors generated from 4T1-Sca-1<sup>-</sup> cells it increased from less than  
161 1% to 15% (Supplemental Figure 2E), similar to the frequency of Sca-1<sup>+</sup> population in  
162 tumors derived from parental 4T1 cells (Figure 1C). In addition, when tumor cells derived  
163 from primary tumors and lung metastases of parental 4T1-injected mice were cultured *ex*  
164 *vivo*, the abundance of the Sca-1<sup>+</sup> population significantly decreased from 20% to 4.5%  
165 and 60% to 19%, respectively (Supplemental Figure 2F).

166 From these observations we conclude that both Sca-1<sup>+</sup> and Sca-1<sup>-</sup> populations are  
167 highly plastic and this plasticity appears to be modulated *in vivo*.

168

### 169 **Tumor-educated Gr1<sup>+</sup>CD11b<sup>+</sup> cells expand the metastatic Sca-1<sup>+</sup> population**

170 Immune cells in the TME are critical determinants of tumor cells functions and behaviors,  
171 including metastatic capacity (39). To collect evidence for a potential correlation between  
172 immune cells and the Sca-1<sup>+</sup> population, we characterized the inflammatory cells infiltrating  
173 the orthotopic primary tumors. We observed a significant increase of the  
174 Gr1<sup>high</sup>CD11b<sup>+</sup>Ly6C<sup>low</sup> population and a significant decrease of the Gr1<sup>low</sup>CD11b<sup>+</sup>Ly6C<sup>high</sup>  
175 population in tumors derived from the 4T1-Sca-1<sup>+</sup> cells, compared to tumors derived from  
176 the 4T1-Sca-1<sup>-</sup> cells (Figure 2A). Gr1<sup>high</sup>CD11b<sup>+</sup>Ly6C<sup>low</sup> cells are immature myeloid  
177 progenitors mobilized from the bone marrow by tumor-derived signals capable of  
178 establishing an immunosuppressive environment facilitating tumor progression and  
179 metastasis (40, 41). Gr1<sup>+</sup>CD11b<sup>+</sup> cells form a homogenous population in the circulation  
180 (Supplemental Figure 3A), consistent with the literature (42), while in the TME they



181 differentiated into two distinct subpopulations, Gr1<sup>high</sup> and Gr1<sup>low</sup>. To examine the direct  
182 contribution of the tumor-educated Gr1<sup>+</sup>CD11b<sup>+</sup> cells in promoting the enrichment of the  
183 Sca-1<sup>+</sup> population, we isolated Gr1<sup>+</sup> cells from primary tumors, bone marrow and spleen of  
184 4T1 tumor-bearing BALB/c mice by MACS, and co-cultured them *in vitro* with parental 4T1  
185 cells (Figure 2B). Gr1<sup>+</sup> cells isolated from tumors (Tu-Gr1<sup>+</sup>CD11b<sup>+</sup>), but not from spleen  
186 (Spl- Gr1<sup>+</sup>CD11b<sup>+</sup>) or bone marrow (BM-Gr1<sup>+</sup>CD11b<sup>+</sup>), significantly induced the expansion  
187 of a Sca-1<sup>+</sup> population in 4T1 cells (from 12.5% to 81%, p<0.001) in 48 hours (Figure 2C).  
188 To test whether the expansion of a Sca-1<sup>+</sup> population from 4T1 cells required direct contact  
189 with Tu-Gr1<sup>+</sup>CD11b<sup>+</sup> or was mediated by soluble factors, we compared the induction in two  
190 different co-culture setups, either in standard wells (cell contact) or in Transwells, where  
191 Tu-Gr1<sup>+</sup>CD11b<sup>+</sup> and 4T1 cells were separated by a filter with 0.4 μm pores (Figure 2D).  
192 We did not observe any significant difference in the induction efficiency of Sca-1<sup>+</sup>  
193 populations (measured by flow cytometry) between the two conditions and increasing the  
194 4T1:Tu-Gr1<sup>+</sup>CD11b<sup>+</sup> cell ratio from 1:1 to 1:3 did not further expand the Sca-1<sup>+</sup> population  
195 (Figure 2E). Furthermore, conditioned medium from co-cultured Tu-Gr1<sup>+</sup>CD11b<sup>+</sup> and 4T1  
196 cells was also capable of subsequently expanding the Sca-1<sup>+</sup> population from 4T1 cells  
197 alone (Supplemental Figure 3B). Interestingly, the Tu-Gr1<sup>+</sup>CD11b<sup>+</sup> induced Sca-1<sup>+</sup>  
198 population appeared more stable in time compared to the isolated 4T1-Sca-1<sup>+</sup> cells  
199 (Supplemental Figure 3C and Supplemental Figure 2E). More importantly, when  
200 Gr1<sup>+</sup>CD11b<sup>+</sup> cells-primed 4T1 cells were injected into the tail vein, Tu-Gr1<sup>+</sup>CD11b<sup>+</sup> primed  
201 ones showed higher lung colonization capacity compared to Spl-Gr1<sup>+</sup>CD11b<sup>+</sup> primed one  
202 (Figure 2F-H).

203         These results imply that tumor-educated Gr1<sup>+</sup>CD11b<sup>+</sup> cells induce the emergence of  
204 a highly metastatic Sca-1<sup>+</sup> population through secreted factors.

205

206 **Tu-Gr1<sup>+</sup>CD11b<sup>+</sup>-induced and tumor-inherent Sca-1<sup>+</sup> populations display distinct**  
207 **gene expression profiles**

208 To unravel the molecular basis for the metastatic capacity of the inherent 4T1- Sca-1<sup>+</sup>  
209 population and the Tu-Gr1<sup>+</sup>CD11b<sup>+</sup> induced Sca-1<sup>+</sup> population, we first performed  
210 transcriptomic profiling of 4T1-Sca-1<sup>+</sup> and 4T1-Sca-1<sup>-</sup> cells isolated from the parental 4T1  
211 line. Pathway enrichment analysis showed that 4T1-Sca-1<sup>+</sup> and 4T1-Sca-1<sup>-</sup> cells  
212 expressed different genes associated with distinct signaling pathways (Figure 3A). The top  
213 200 significantly upregulated and downregulated genes were extracted as Sca1 Positive  
214 and Sca1 Negative signatures, respectively (Supplemental Table 1). Next, we performed  
215 transcriptomic profiling of Tu-Gr1<sup>+</sup>CD11b<sup>+</sup>-primed 4T1, Spl-Gr1<sup>+</sup>CD11b<sup>+</sup>-primed 4T1 and  
216 parental 4T1 cells. Pathway enrichment analysis revealed that Tu-Gr1<sup>+</sup>CD11b<sup>+</sup> and Spl-  
217 Gr1<sup>+</sup>CD11b<sup>+</sup> priming induced distinct transcriptomic alterations in 4T1 cells (Figure 3B). To  
218 focus on the transcriptomic alternations related to the Sca-1<sup>+</sup> population conversion, we  
219 compared Tu-Gr1<sup>+</sup>CD11b<sup>+</sup>-primed vs Spl-Gr1<sup>+</sup>CD11b<sup>+</sup>-primed cells. Interestingly, Tu-  
220 Gr1<sup>+</sup>CD11b<sup>+</sup>-primed 4T1 cells expressed both Sca-1 Positive and Sca-1 Negative  
221 signatures (Figure 3C), suggesting that Tu-Gr1<sup>+</sup>CD11b<sup>+</sup> may twist tumor plasticity by  
222 converting the 4T1-Sca-1<sup>-</sup> cells into 4T1-Sca-1<sup>+</sup> cells, rather than expanding the pre-  
223 existing 4T1-Sca-1<sup>+</sup> population.

224 To test whether, despite the diverse transcriptional profiles across different Sca-1<sup>+</sup>  
225 populations, there could be a common molecular mechanism underlying their induction  
226 and metastatic capacity, we compared the significantly differentially expressed genes  
227 between 4T1-Sca-1<sup>+</sup> versus 4T1-Sca-1<sup>-</sup> and Tu-Gr1<sup>+</sup>CD11b<sup>+</sup> primed 4T1 versus Spl-  
228 Gr1<sup>+</sup>CD11b<sup>+</sup> primed 4T1 cells. Strikingly, among a total of 1118 up- and 423 down-  
229 regulated genes found when comparing the two conditions, only 56 up- and one down-  
230 regulated genes were shared (Figure 3D and Supplemental Table 1). This observation was

231 consistent with the notion that the Sca-1<sup>+</sup> population in Tu-Gr1<sup>+</sup>CD11b<sup>+</sup> primed 4T1 cells  
232 was different from the inherent 4T1-Sca-1<sup>+</sup> cells. Nonetheless, the fact that the 4T1-Sca-  
233 1<sup>+</sup> cells and Tu-Gr1<sup>+</sup>CD11b<sup>+</sup> primed 4T1 cells possessed similar *in vivo* metastatic capacity  
234 suggested that among these common pathways some were relevant for 4T1 metastases  
235 formation. To this end, we analyzed the publicly available scRNA-seq dataset from 4T1  
236 primary tumors of Sebastian *et al.* (43). In this dataset, several cell types, including cancer  
237 cells, epithelial cells, fibroblasts, distinct subpopulations of myeloid cells were identified  
238 (43). To determine significant ligand-receptor interactions from the scRNA-seq data, we  
239 performed cell-cell interaction analysis with CellPhoneDB (44) by focusing on the  
240 interactions between epithelial/cancer cells and myeloid cells (Figure 3E, F). The analysis  
241 identified 160 ligand-receptor interaction pairs (Supplemental Table 2). Among those pairs,  
242 OSM receptor (OSMR) and pyrimidinergic receptor P2Y6 (P2RY6) were the only ones  
243 present inside the 56 common genes shown in Figure 3D. However, P2RY6 interacts with  
244 COPA (Coatomer Complex Subunit Alpha), a membrane protein involved in membrane  
245 traffic between endoplasmic reticulum and Golgi (45) and, thus, unlikely to mediate cell-  
246 cell contact-independent induction of the Sca-1<sup>+</sup> population. As the IL6-JAK-STAT3  
247 signaling pathway was upregulated both in the 4T1-Sca-1<sup>+</sup> population and Tu-  
248 Gr1<sup>+</sup>CD11b<sup>+</sup>-primed 4T1 cells (Figure 3A, B), we next examined the expression of *Osm*,  
249 *Osmr*, *Il6st*, *Il6*, and *Il6* receptor (*Il6ra*) in the Sebastian dataset (Figure 3G). The  
250 expression of *Il6* and *Osm* was restricted to myeloid cells, with *Osm* expression being more  
251 prominent, similar to a previous report (33). *Osmr* was predominantly expressed in tumor  
252 cells, while *Il6st* and *Il6ra* were homogenously expressed in all cell types.

253 We then explored their expression in the 4T1-Sca-1<sup>+</sup> cells and Tu-Gr1<sup>+</sup>CD11b<sup>+</sup>  
254 primed 4T1 cells. *Osm* and *Il6* expression were very low in all samples (normalized count  
255 number less than 7 on average) (Figure 3H-I), consistent with data in the Sebastian dataset

256 (Figure 3G). *Osmr* and *Il6ra*, however, were highly expressed in 4T1-Sca-1<sup>+</sup> cells  
257 compared with 4T1-Sca-1<sup>-</sup> cells, while the expression of *Il6st* was abundant in both  
258 populations, though higher in 4T1-Sca-1<sup>+</sup> cells (Figure 3H). On the other hand, only *Osmr*  
259 was significantly upregulated in Tu-Gr1<sup>+</sup>CD11b<sup>+</sup> primed 4T1 compared with Spl-  
260 Gr1<sup>+</sup>CD11b<sup>+</sup> primed 4T1 (Figure 3I).

261 Taken together, these results suggest that OSM/OMSR and IL6/IL6R signaling  
262 pathways may be involved in the Tu-Gr1<sup>+</sup>CD11b<sup>+</sup>-mediated expansion of 4T1-Sca-1<sup>+</sup> cells.

263

### 264 **Tu-Gr1<sup>+</sup>CD11b<sup>+</sup> cells promote Sca-1<sup>-</sup> to Sca-1<sup>+</sup> population conversion**

265 The above results strongly implied that Tu-Gr1<sup>+</sup>CD11b<sup>+</sup> cells convert Sca-1<sup>-</sup> population into  
266 the Sca-1<sup>+</sup> one. To further test this hypothesis, we compared the cell population dynamics  
267 in cultured cells and the orthotopic primary tumors by analyzing publicly available scRNA-  
268 seq datasets. By integrating scRNA-seq data from 3D cultured 4T1 cells (GSM4812003)  
269 (46) and tumor cells isolated from orthotopically fat pad-injected 4T1 primary tumor (PT)  
270 (GSM3502134) (47) (Figure 4A, B), we observed 5 clusters. Clusters 0, 1, 2, 4 were  
271 predominant in cultured tumor cells, while cluster 3 was predominant in primary tumors.  
272 Single-cell trajectories analysis confirmed that cluster 3 was at the end of the  
273 transformation process (Figure 4C, D). The population dynamics also showed that the  
274 fraction of cells in clusters 1, 2 and 4 decreased during the transformation, the one in  
275 cluster 0 only minimally increased, while the fraction in cluster 3 massively increased  
276 (Figure 4E). Importantly, very few cultured 4T1 cells expressed *Sca-1* while it was  
277 abundantly expressed in the majority of cells in the primary tumor (Supplemental Figure  
278 4A, upper panel). Consistently, the fraction of cells expressing *Osmr* was higher in the  
279 primary tumor compared to cultured cells (Supplemental Figure 4A, lower panel). Similar  
280 observations were obtained when analyzing scRNA-seq data from the ER<sup>+</sup> human breast

281 cancer model MCF-7. After integrating data from cultured MCF-7 cells (GSM4681765) and  
282 tumor cells that were isolated from MCF-7 intraductal injected mammary gland  
283 (GSM5904917) (48), 6 clusters were identified (Figure 4F), with clusters 1 and 3  
284 predominant in cultured MCF-7 cells, while clusters 2 and 4 were predominant in primary  
285 tumors (Figure 4G). Further analysis showed that clusters 2 and 4 expanded during *in vitro*  
286 to *in vivo* tumor cell transformation and represented nearly 50% of the *in vivo* primary tumor  
287 cells (Figure 4H-J). Although there is no human homolog of *Sca1* gene, *OSMR* expressing  
288 cells were increased upon tumor implantation, especially in clusters 2 and 1 (Supplemental  
289 Figure 4B).

290 To further investigate the signals involved in this transformation, we performed  
291 GSAE analysis for cluster 3 in 4T1 cells and clusters 2 and 4 in MCF-7 cells, respectively  
292 (Figure 4K-N). By comparing the Hallmark gene signatures, IL6-JAK-STAT3 signature was  
293 significantly upregulated in both cell populations (Figure 4K, M). Interestingly, *Sca1*  
294 Positive and *Sca1* Negative signatures were both upregulated (Figure 4L, N), which is  
295 consistent with our *ex vivo* induction experiment (Figure 3C). To validate the involvement  
296 of Tu-Gr1<sup>+</sup>CD11b<sup>+</sup> during the cell population transformation, we extracted the top 50  
297 upregulated genes (Supplemental Table 3) identified by comparing the Tu-Gr1<sup>+</sup>CD11b<sup>+</sup>  
298 with the Sp-Gr1<sup>+</sup>CD11b<sup>+</sup>-stimulated 4T1 cells as Tu-Gr1<sup>+</sup>CD11b<sup>+</sup> induced signature. Both  
299 cell populations predominant in the primary tumor in both 4T1 and MCF-7 models,  
300 upregulated the Tu-Gr1<sup>+</sup>CD11b<sup>+</sup> induced signature (Figure 4L, N).

301 These data, together with our *in vivo* observations (Figure 1A-C) and *ex vivo*  
302 coculture experiments (Figure 2B-E and Figure 3C), indicate that Tu-Gr1<sup>+</sup>CD11b<sup>+</sup> convert  
303 the Sca-1<sup>-</sup> population to Sca-1<sup>+</sup> population, likely, via OSM/IL6 signaling pathway.

304

305 **OSM/IL6-JAK pathway mediates Tu-Gr1<sup>+</sup>CD11b<sup>+</sup>-induced Sca-1<sup>+</sup> population**  
306 **enrichment**

307 To experimentally interrogate the role of OSM/IL6 in modulating the Sca-1<sup>+</sup> population, we  
308 first measured *Osm* and *Il6* mRNA expression in Spl-Gr1<sup>+</sup>CD11b<sup>+</sup> and Tu-Gr1<sup>+</sup>CD11b<sup>+</sup>.  
309 Indeed, both *Osm* and *Il6* mRNA levels were significantly elevated in Tu-Gr1<sup>+</sup>CD11b<sup>+</sup>  
310 (Figure 5A). To functionally validate the role of OSM/IL6 in the generation of Sca-1<sup>+</sup>  
311 population, we treated 4T1 cells directly with recombinant OSM and IL6 proteins *in vitro*  
312 and measured the effect on the Sca-1<sup>+</sup> population. After 2 days of treatment, both OSM  
313 and IL6 significantly increased the frequency of Sca-1<sup>+</sup> cells from 16% to 38.8% and 26.5%,  
314 respectively (Figure 5B). Conversely, blocking OSM and IL6 activities using anti- OSM or  
315 -IL6 neutralizing antibodies significantly reduced the emergence of Sca-1<sup>+</sup> population  
316 induced by Tu-Gr1<sup>+</sup>CD11b<sup>+</sup> conditioned medium (Figure 5C). The combination of anti-  
317 OSM and -IL6 antibodies did not have additive effects suggesting that OSM and IL6 both  
318 contribute in promoting Sca-1<sup>+</sup> population by sharing the same signaling cascades.

319 OSMR and IL6R signal by activating the intracellular Janus tyrosine kinase (JAK)  
320 (49). To explore the involvement of the JAK pathway in the emergence of the Sca-1<sup>+</sup>  
321 population, we treated 4T1 cells with the JAK inhibitor (Ruxolitinib) during exposure to  
322 recombinant OSM and IL6. Ruxolitinib treatment prevented the emergence of the Sca-1<sup>+</sup>  
323 population in response to recombinant OSM and IL6 (Figure 5D).

324 From these results, we conclude that OSM/IL6-JAK pathway mediates Tu-  
325 Gr1<sup>+</sup>CD11b<sup>+</sup>-induced Sca-1<sup>+</sup> population enrichment.

326  
327 **Tu-Gr1<sup>+</sup>CD11b<sup>+</sup>-induced Sca-1<sup>+</sup> population and 4T1-inherent Sca-1<sup>+</sup> population have**  
328 **distinct CSC and EMT gene expression profiles**

329 OSM/IL6-JAK signaling has been reported to support tumor progression by promoting a  
330 CSC phenotype and epithelial-mesenchymal plasticity (25, 36, 50). To further characterize  
331 CSC and EMT features in 4T1-Sca-1<sup>+</sup> cells and Tu-Gr1<sup>+</sup>CD11b<sup>+</sup> induced Sca-1<sup>+</sup>  
332 population, we interrogated our RNAseq data set for the expression of 17 stem cell and  
333 EMT markers (Supplemental Figure 5). The stem cell markers *Oct4 (Pou5f1)*, *Sox2* and  
334 *Nanog* were undetectable or very low in all or some samples. 4T1-Sca-1<sup>+</sup> cells had higher  
335 expression of *Aldh1a1*, *Aldh3a1* and *Podxl* but lower expression of *Klf4* and *Sox9*  
336 compared to 4T1-Sca-1<sup>-</sup> cells. There was no difference in the expression of *Abcg2* and  
337 *Has2*. Tu-Gr1<sup>+</sup>CD11b<sup>+</sup> primed 4T1 cells had higher expression of *Klf4* and *Has2*, lower  
338 expression of *Aldh1a1*, *Aldh3a1* and *Sox9*, and similar expression of *Podxl* when  
339 compared with Spl-Gr1<sup>+</sup>CD11b<sup>+</sup> primed 4T1. Among them, only *Has2* expression was  
340 specifically elevated in Tu-Gr1<sup>+</sup>CD11b<sup>+</sup> primed 4T1 compared with control 4T1 and Spl-  
341 Gr1<sup>+</sup>CD11b<sup>+</sup>-primed 4T1 (Supplemental Figure 5A). On the other hand, 4T1-Sca-1<sup>+</sup> cells  
342 had lower expression of *Cdh1* and higher expression of *Snail1*, *Twist1*, *Vim* and *Foxc1*  
343 which support an EMT status, although *Zeb1* expression was reduced (Supplemental  
344 Figure 5B). Globally, the expression of most of the EMT genes were similar between Tu-  
345 Gr1<sup>+</sup>CD11b<sup>+</sup> and Spl-Gr1<sup>+</sup>CD11b<sup>+</sup> primed 4T1 cells, except for *Snail2* and *Vim*, whose  
346 expression was suppressed in Tu-Gr1<sup>+</sup>CD11b<sup>+</sup> primed 4T1 (Supplemental Figure 5B).

347 Taken together, these results indicate that the Tu-Gr1<sup>+</sup>CD11b<sup>+</sup>-induced Sca-1<sup>+</sup>  
348 population and inherent Sca-1<sup>+</sup> population have different CSC and EMT transcriptional  
349 profiles, reinforcing the notion that, Tu-Gr1<sup>+</sup>CD11b<sup>+</sup>-induced Sca-1<sup>+</sup> population are not just  
350 enriched tumor-inherent Sca-1<sup>+</sup> population

351

352 **Chemotherapy enriches a Sca-1<sup>+</sup> population with CSC features**



353 CSC and cancer cell plasticity contribute to drug resistance in various tumor types,  
354 including breast cancer (51–55). The above results, including the significantly elevated  
355 expression of *Aldh3a1* (a marker of drug resistance) in the 4T1-Sca-1<sup>+</sup> population  
356 prompted us to investigate the resistance of this population to chemotherapy. To this end,  
357 we treated 4T1 cells for 48 hours *in vitro* with methotrexate (MTX) and doxorubicin (Dox),  
358 two widely used chemotherapy drugs, including in breast cancer. The 48 hours treatment  
359 of either drug increased the frequency of Sca-1<sup>+</sup> population in 4T1 cells (Figure 6A). Next,  
360 we mimicked a clinically relevant situation of cancer cells escaping chemotherapy by  
361 exposing 4T1 cells to 28 nM MTX, a concentration slightly higher than the IC<sub>50</sub>  
362 concentration of the drug, for up to 3 weeks and recovered the surviving cells by switching  
363 to normal medium (Figure 6B). The selected cell line, named MR13, was highly enriched  
364 in Sca-1<sup>+</sup> cells (>60%) (Figure 6C). Compared to parental 4T1 tumor cells, MR13 cells  
365 exhibited a higher mammosphere forming efficiency (Figure 6D), lower *in vitro* proliferative  
366 capacity (Figure 6E) and increased cell mobility (Figure 6F), which were consistent with  
367 CSC-like properties. When tested in a 48-hours cytotoxicity assay, MR13 cells were more  
368 resistant against MTX compared to parental 4T1 (Supplemental Figure 6A).

369

### 370 **MR13-derived tumors are highly metastatic and rich in Gr1<sup>high</sup>CD11b<sup>+</sup> Ly6C<sup>low</sup> cells**

371 To characterize the *in vivo* behavior of MR13 cells, we orthotopically implanted them into  
372 BALB/c mice and monitored the progression. MR13 cells formed smaller primary tumors  
373 relative to parental 4T1 cells, that were more metastatic to the lung (Figure 6G-I) and  
374 enriched in Gr1<sup>high</sup>CD11b<sup>+</sup> Ly6C<sup>low</sup> cells compared to 4T1 tumors (Figure 6J), similarly to  
375 4T1-Sca-1<sup>+</sup>-derived tumors (Figure 2A). Strikingly, we observed metastases in the heart  
376 (Supplemental Figure 6B), which we never observed with the parental 4T1 cells. MR13  
377 cells retained a large fraction of the Sca-1<sup>+</sup> population *in vitro*, even when cultured in the



378 absence of MTX (Figure 6C) and upon *in vivo* expansion (Figure 6K). Such stability of Sca-  
379 1 population contrasted with 4T1-Sca-1<sup>+</sup> cells and Tu-Gr1<sup>+</sup>CD11b<sup>+</sup>-primed 4T1 cells  
380 (Supplemental Figure 2E, G) that, upon isolation or induction reverted to a Sca-1<sup>-</sup>  
381 phenotype, suggesting that MR13 line was capable of self-sustain its own Sca-1<sup>+</sup>  
382 population.

383 Taken together, chemotherapy-selected MR13 cells share some similar *in vivo*  
384 characteristics as 4T1-Sca-1<sup>+</sup> cells, while they are capable of self-sustaining high Sca-1<sup>+</sup>  
385 abundancy both *in vitro* and *in vivo*.

386  
387 **IL6/IL6R-JAK autocrine signaling maintains Sca-1 positivity and metastatic capacity**  
388 **in MR13 cells**

389 To better understand the chemotherapy-induced alterations in MR13 cells, we performed  
390 transcriptomic analyses comparing MR13 and parental 4T1 cells. Pathway enrichment  
391 analysis showed that the IL6-JAK-STAT3 signature was also elevated in MR13 cells  
392 (Figure 7A). Importantly, MR13 gene expression significantly positively correlated with the  
393 Sca1 Positive signature. At the same time, it negatively correlated with the Sca1 Negative  
394 signature (Figure 7B). This observation suggested that chemotherapy enriched for the  
395 inherent 4T1-Sca-1<sup>+</sup> population, rather than converting plastic Sca-1<sup>-</sup> cells, as observed  
396 upon Tu-Gr1<sup>+</sup>CD11b<sup>+</sup>-stimulation. In addition, *Osmr*, *Il6*, *Il6ra* and *Il6st* were all  
397 overexpressed in MR13 cells compared to parental 4T1 cells, while the *Osm* expression  
398 was not altered (Figure 7C). To functionally validate the IL6-JAK signaling pathway in Sca-  
399 1<sup>+</sup> population maintenance, we treated MR13 cells with Ruxolitinib *in vitro* for 48 hours.  
400 The treatment significantly decreased the fraction of Sca-1<sup>+</sup> cells (Figure 7D). Importantly,  
401 *in vitro* treatment of MR13 cells with Ruxolitinib for 3 days nearly completely abolished their  
402 lung metastatic capacity upon tail vein injection (Figure 7E-F).

403 Altogether, these data suggest that MR13 cells sustain the metastatic Sca-1<sup>+</sup>  
404 population through cell-autonomous activation of the IL6-JAK signaling pathway.

405  
406 **Tu-Gr1<sup>+</sup>CD11b<sup>+</sup> invoked tumor cell signature predicts shorter overall and relapse-**  
407 **free survival in breast cancer patients**

408 To evaluate the clinical relevance of the crosstalk between Tu-Gr1<sup>+</sup>CD11b<sup>+</sup> and tumor  
409 cells, we tested whether the Tu-Gr1<sup>+</sup>CD11b<sup>+</sup>-induced 4T1 signature could predict cancer  
410 progression in patients. To this end, we interrogated the METABRIC dataset (56) with the  
411 Tu-Gr1<sup>+</sup>CD11b<sup>+</sup>-induced signature. Thirty-two human orthologue genes (Supplemental  
412 Table 3) in the murine 50 genes signature were present in the METABRIC dataset. Patients  
413 with the higher expression level of the signature had shorter overall survival (OS;  $p =$   
414 0.0056) and relapse-free survival (RFS;  $p = 0.032$ ) (Figure 8A, B). Notably, OSM  
415 expression positively correlated with the signature in all patients (Supplemental Figure 7A),  
416 suggesting OSM do contribute to altered signature expression in patients. Of the thirty-two  
417 genes, five (*MX1*, *IRF7*, *OAS1*, *CMPK2*, *ISG15*) were commonly discriminant for a shorter  
418 OS and RFS (Figure 8C, D), and taken together, they further enhanced the predictive  
419 power (OS:  $p=0.00055$ ; RFS:  $p=0.00069$ ) (Figure 8E, F).

420 These data indicate that a small set of genes issued from the murine tumor cell  
421 signature invoked by Tu-Gr1<sup>+</sup>CD11b<sup>+</sup> cells can predict a shorter OS and RFS in breast  
422 cancer patients, thereby reinforcing the clinical significance of the proposed model.

423  
424 **Discussion**

425 Metastatic disease and therapy resistance are the leading causes of breast cancer  
426 mortality, calling for novel approaches to effectively prevent and cure for metastasis and  
427 therapy resistance. This is particularly relevant for TNBC, where in spite of the recent

428 encouraging results with targeted therapies, such as PARP inhibitors for tumors with  
429 germline BRCA mutations, or checkpoint inhibitors for PD-L1<sup>+</sup> tumors, management of  
430 metastatic disease remains challenging (57–60). It has been proposed that CSCs present  
431 in the primary tumor are responsible for tumor persistence, metastasis, and therapy  
432 resistance (52, 61). Enrichment and differentiation of CSC contribute to tumor  
433 heterogeneity (17, 19–22). Importantly, CSC features can be intrinsic or plastic and be  
434 modulated by cues from the TME (62–64).

435         Here, we have interrogated the contribution of the Sca-1<sup>+</sup> population to breast  
436 cancer metastasis and its modulation by the TME. We reported that tumor-educated  
437 Gr1<sup>+</sup>CD11b<sup>+</sup> cells (Tu-Gr1<sup>+</sup>CD11b<sup>+</sup>) instigate cancer metastasis by twisting cancer cell  
438 plasticity and enriching for a Sca-1<sup>+</sup> population with enhanced metastatic capacity. We  
439 identified OSM/IL6-JAK as a paracrine communication axis between Tu-Gr1<sup>+</sup>CD11b<sup>+</sup> and  
440 breast cancer cells and as an autocrine loop in chemotherapy-resistant tumor cells,  
441 promoting tumor heterogeneity, CSC features and metastatic capacity. Importantly, breast  
442 cancer patients expressing high levels of the human orthologues of the gene expression  
443 signatures invoked by Tu-Gr1<sup>+</sup>CD11b<sup>+</sup> have significantly shorter OS and RFS, reinforcing  
444 the clinical significance of our findings. While some of these elements have been reported  
445 individually before, our results extend these observations by providing an integrative view  
446 of paracrine (Tu-Gr1<sup>+</sup>CD11b<sup>+</sup>-induced) and autocrine (chemotherapy-induced)  
447 communication in regulating tumor heterogeneity, cancer cell plasticity, metastasis, and  
448 resistance to chemotherapy.

449         A main observation stemming from this study is that Sca-1<sup>+</sup> population exists under  
450 three different conditions: as inherent 4T1-Sca-1<sup>+</sup> population, upon exposure to Tu-  
451 Gr1<sup>+</sup>CD11b<sup>+</sup> cells and upon chemotherapy treatment (MR13). All these populations had  
452 higher metastatic abilities compared to their counterpart controls. GSEA analysis

453 suggested that the Tu-Gr1<sup>+</sup>CD11b<sup>+</sup>-induced Sca-1<sup>+</sup> population was likely to convert from  
454 the Sca-1<sup>-</sup> population (Figure 3C and Figure 4), while the Sca-1<sup>+</sup> population surviving  
455 chemotherapy (MR13) appeared to be enriched from the inherent Sca-1<sup>+</sup> population  
456 (Figure 7B). In addition, the different gene expression signature of Tu-Gr1<sup>+</sup>CD11b<sup>+</sup>-  
457 induced Sca-1<sup>+</sup> population relative to the inherent Sca-1<sup>+</sup> cells suggest a remarkable  
458 functional plasticity of these cells. This plasticity is further supported by comparing single  
459 cell gene expression of murine 4T1 and human MCF-7 breast cancer cells, using publicly  
460 available scRNA-seq datasets, before and after *in vivo* growth (Figure 4). *In vivo*, tumor  
461 cells undergo a transformation enriching for Sca-1 (in the mouse), OSMR expressing cells,  
462 Sca1 Positive, Sca1 Negative and Tu-Gr1<sup>+</sup>CD11b<sup>+</sup>-induced signatures, and IL6-JAK  
463 signaling pathway from precursor cells (Sca-1<sup>-</sup> in the mouse) (Figure 4). Gong *et al.* have  
464 reported that sorted Sca-1<sup>-</sup> 4T1 cells could be transiently transformed into a Sca-1<sup>+</sup>  
465 population by radiotherapy (65). An analogous observation was reported in colorectal  
466 cancer, where selective ablation of LGR5<sup>+</sup> CSCs in organoids leads to initial tumor  
467 regression, followed by regrowth driven by LGR5<sup>+</sup> CSCs reemerging from the LGR5<sup>-</sup>  
468 population (66). Taken together, by demonstrating that tumor recruited and educated  
469 Gr1<sup>+</sup>CD11b<sup>+</sup> cells contribute to such plasticity by inducing the conversion of low metastatic  
470 Sca-1<sup>-</sup> population into a highly metastatic Sca-1<sup>+</sup> population, our observations further  
471 consolidate the notion that cancer consists of a heterogenous and plastic tumor mass,  
472 including highly metastatic cell populations. Dedicated time course scRNA-seq analyses  
473 together with lineage tracing experiments may help to further characterize the detailed  
474 origin, development, fate, and function of these Sca-1<sup>+</sup> populations during cancer  
475 progression.

476 Recruitment and accumulation of Gr1<sup>+</sup>CD11b<sup>+</sup> cells in the TME, particularly through  
477 the chemokines CCL2, CXCL1 and CXCL2, or IL-33, is considered a critical step for their

478 contribution to tumor progression and metastasis (67–70). Consistent with these  
479 observations, tumors derived from sorted 4T1-Sca-1<sup>+</sup> cells, or MR13 cells that are  
480 intrinsically enriched for Sca-1<sup>+</sup> cells, have a higher content of Gr1<sup>high</sup>CD11b<sup>+</sup>Ly6C<sup>low</sup> cells  
481 compared to tumors derived from 4T1-Sca-1<sup>-</sup> or parental 4T1 cells, respectively (Figure 2A  
482 and 5K). Beyond recruitment, tumor-mediated education of Gr1<sup>+</sup>CD11b<sup>+</sup> cells, appears to  
483 be necessary to gain higher metastatic activity: Only Gr1<sup>+</sup>CD11b<sup>+</sup> cells recovered from  
484 primary tumors (but not from spleen or bone marrow) induced Sca-1 positivity and  
485 enhanced metastatic ability in 4T1 cells (Figure 2C, E). The role of Gr1<sup>+</sup>CD11b<sup>+</sup> cells in  
486 promoting metastasis has been mainly attributed to promotion of angiogenesis, EMT and  
487 immunosuppression (17, 68). Peng *et al.*, reported the ability of those cells to endow CSC-  
488 like features to breast cancer cells but their metastatic capacity was not interrogated (17).  
489 Our observations suggest a self-sustaining positive feedback mechanism between highly  
490 metastatic cancer cells (Sca-1<sup>+</sup> population) and Gr1<sup>+</sup>CD11b<sup>+</sup> cells: inherent Sca1<sup>+</sup> CSC-  
491 like, metastatic, cells promote recruitment and local education of Gr1<sup>+</sup>CD11b<sup>+</sup> cells, which  
492 in turn promote tumor heterogeneity, cancer cell plasticity and metastatic capacity by  
493 converting low-metastatic Sca1<sup>-</sup> cells into additional high-metastatic Sca1<sup>+</sup> cells (Figure 9).  
494 Recently, it was reported that neutrophils escorting blood circulating tumor cells (CTCs)  
495 expands the metastatic potential of CTCs (71). While this effect was attributed to the  
496 promotion of cell cycle progression of CTCs through direct contact with the neutrophils, in  
497 light of our findings, one may also consider the possibility that clustered neutrophils may  
498 also promote the expansion of a CSCs-like phenotype with higher metastatic capacity.  
499 Interestingly, OSM was reported to be expressed by neutrophils cocultured with breast  
500 cancer cells (36) and to promote phenotypic changes associated with mesenchymal and  
501 stem cell-like differentiation in breast cancer (36, 72). Together with our observation, these  
502 findings further reinforce the notion that boosting the *Osm* expression in Gr1<sup>+</sup>CD11b<sup>+</sup> cells

503 is part of their educating program prompted by the tumor. One outstanding question raised  
504 by these observations is by which mechanisms and pathways cancer cells, in particular  
505 Sca-1<sup>+</sup> ones, educate Gr1<sup>+</sup>CD11b<sup>+</sup> cells to acquire cancer plasticity-promoting activity.

506 Besides directly activating tumor cells, OSM has also been shown to remodel  
507 macrophages and fibroblasts of the TME (33, 36). Araujo *et al.* recently reported that OSM  
508 derived from tumor-infiltrating myeloid cells reprogram fibroblasts to secrete VEGF and the  
509 chemokines CXCL1 and CXCL16, resulting in enhanced myeloid cell recruitment and  
510 breast cancer progression (33). Here we extend these observations by demonstrating that  
511 tumor-educated Gr1<sup>+</sup>CD11b<sup>+</sup>-derived OSM/IL6 twist cancer cell plasticity by promoting a  
512 rapid but reversible conversion of Sca-1<sup>-</sup> cells into more metastatic Sca-1<sup>+</sup> cells (Figure  
513 5B). We further broaden the implications of the OSM/IL6-JAK axis, by demonstrating that  
514 MR13 cells that have escaped chemotherapy hijacked this paracrine mechanism in a cell  
515 autonomous manner by elevating the *Il6* expression (Figure 9). Significantly, a short *in vitro*  
516 treatment with Ruxolitinib effectively abrogated their metastatic capacity (Figure 7E, F).

517 While OSM/OSMR is the only interaction pair identified by the cell-cell interaction  
518 analysis (Figure 3F, G), it is possible that other molecular mechanisms may also play roles  
519 in modulating Sca-1<sup>+</sup> cell plasticity and metastasis. One candidate is the IL6/IL6R  
520 communication axis, which was less prominent in the cell-cell communication analysis  
521 (Figure 3F, G), but highly expressed in our experimental data in Tu-Gr1<sup>+</sup>CD11b<sup>+</sup> compared  
522 with Spl-Gr1<sup>+</sup>CD11b<sup>+</sup> (Figure 5A) and in chemotherapy-resistant MR13 cells compared  
523 with 4T1 (Figure 7C). Moreover, the neutralization of IL6 also suppressed the Tu-  
524 Gr1<sup>+</sup>CD11b<sup>+</sup> conditioned medium induced Sca-1<sup>+</sup> cell enrichment, much alike OSM  
525 inhibition (Figure 5C).

526 Importantly, we demonstrated that a human orthologue signature of the 4T1 gene  
527 expression signature invoked by Tu-Gr1<sup>+</sup>CD11b<sup>+</sup> can predict a significantly shorter OS and

528 RFS in breast cancer patients (Figure 8). This finding strengthens the clinical significance  
529 of the observed crosstalk between Tu-Gr1<sup>+</sup>CD11b<sup>+</sup> and tumor cells. Strikingly, the five  
530 genes that significantly contribute to the discriminatory power of the signature are genes  
531 related to native or viral immunity or regulated by interferon. While expression of interferons  
532 and interferon response genes in breast cancer has been mainly associated with tumor  
533 suppression and improved survival (73), there is evidence also correlating interferon  
534 responses with tumor promotion, therapy resistance and reduced survival (74). As  
535 JAKs/STATS are activated by both IFN and OSM/IL6 receptors, it is conceivable that  
536 OSM/IL6 only activates a subset of the IFN-induced genes with tumor-promoting activity,  
537 as the case for Mx1 (75). Consistent with our findings, JAK/STAT signaling has recently  
538 been shown to initiate the lineage plasticity in prostate cancer as well as to promote lineage  
539 plasticity-driven targeted therapy resistance in a stem-like subpopulation of prostate cancer  
540 (76, 77). On the other hand, Aouad *et al.* showed that epithelial-mesenchymal plasticity is  
541 essential for the generation of a dormant cell state of ER<sup>+</sup> breast cancer during progression,  
542 and the activation of IL6-JAK-STAT signaling triggers tumor cell awakening and recurrence  
543 (48).

544 One crucial question raised by these results is whether the OSM/IL6-JAK pathway is  
545 a potential actionable clinical target to impinge on metastatic progression and therapy  
546 resistance. In particular, the observation that a short *in vitro* treatment of the highly  
547 metastatic MR13 cells profoundly suppressed their metastatic capacity *in vivo* (Figure 7E,  
548 F), suggests potential long-lasting effects consistent with an adjuvant effect. JAK inhibitors  
549 are being tested in clinical trials in breast cancer. A phase I study combining Ruxolitinib  
550 with paclitaxel in HER2-negative metastatic breast cancer showed good tolerability and  
551 evidence of activity (78). A phase I/II trial of Ruxolitinib in combination with trastuzumab in  
552 metastatic HER2 positive breast cancer and a phase II study combining Ruxolitinib with



553 capecitabine in advanced HER2<sup>-</sup> breast cancer, however, did not improve progression-free  
554 survival (79, 80). The absence of benefits in these studies in advanced breast cancer and  
555 our reported mechanistic observations on metastatic progression, raise the question of  
556 whether the JAK inhibitors should be considered in adjuvant setting in high-risk patients,  
557 to prevent progression to metastases, rather than treating patients already bearing  
558 metastases.

559 In conclusion, we reported here that a subpopulation of tumor cells within the tumor  
560 mass educates required Gr1<sup>+</sup>CD11b<sup>+</sup> cells to convert a low metastatic subpopulation into  
561 highly metastatic one, through the OSM/IL6-JAK signaling axis (Figure 9). The clinical  
562 relevance of this observation is supported by human transcriptomic data. This process is  
563 hijacked by tumor cells that survived chemotherapy and evolved toward a highly metastatic  
564 phenotype via cell autonomous IL6-JAK signaling. Importantly, a short *in vitro* treatment  
565 with a clinically approved JAK inhibitor, Ruxolitinib, suppresses their metastatic capacity  
566 these cells *in vivo*. These results should stimulate considering testing JAK inhibitors in the  
567 adjuvant setting in TNBC breast cancer patients at high-risk for metastatic progression.

568

569

## 570 **Methods**

571 **Cell culture.** The 4T1 murine breast cancer cell line was kindly provided by Dr Fred R.  
572 Miller (Michigan Cancer Foundation, Detroit, MI, USA). 4T1 cells were cultured in high  
573 glucose DMEM supplemented with 10% heat-inactivated FBS, 1% penicillin–streptomycin  
574 (P/S, from Gibco) and 1% Non-Essential Amino Acid (Gibco).

575

576 **Tumor models.** 4T1, MR13, sorted 4T1-Sca-1<sup>+</sup> and 4T1-Sca-1<sup>-</sup> (5x10<sup>4</sup> cells in 50μl  
577 PBS/10% of 8.1 mg/ml Matrigel Matrix, were injected in the fourth right mammary gland of



578 mice. Prior to surgery, ketamine (1.5 mg/kg) and xylazine (150 mg/kg) (both from Graeb) 579 were injected intra-peritoneally to anesthetize the animals. Immune cell populations were 580 analyzed at different time points post-tumor cell injection. Tumor length and width were 581 measured twice a week with caliper and used to calculate tumor volume by the following 582 equation:  $\text{volume} = (\text{length} \times \text{width}^2) \times \pi/6$ . Tumors were collected and weighted at 583 necropsy. For the intravenous injections,  $2 \times 10^5$  sorted 4T1-Sca-1<sup>+</sup> and 4T1-Sca-1<sup>-</sup> tumor 584 cells resuspended in a volume of 50  $\mu\text{l}$  of PBS were injected into the mice tail vein. Lung 585 metastases were quantified 10 days post-injection. At each indicated time point, mice were 586 sacrificed according to defined ethical criteria and were killed by CO<sub>2</sub> inhalation followed 587 by neck dislocation or terminal bleeding. All animal procedures were performed in 588 accordance with the Swiss legislations on animal experimentation and approved by the 589 Cantonal Veterinary Service of the Cantons Vaud and Fribourg for experiments in 590 Lausanne and Fribourg (VD\_1486.2; 2017\_34\_FR; 2017\_34\_FR, 2014\_58\_FR; 2011-33- 591 FR).

592

593 **Reagents and chemicals.** Growth factor reduced Matrigel Matrix (MG) was obtained from 594 Becton Dickinson (BD Biosciences). Collagenase I was purchased from Worthington and 595 DNase I from Roche. Bovine serum albumin (BSA), crystal violet (CV) and 596 paraformaldehyde (PFA) were obtained from Sigma-Aldrich. Drugs, inhibitors and 597 cytokines: Doxorubicin and Methotrexate (generously provided by the Department of 598 Oncology, University Hospital, University of Lausanne, Lausanne, Switzerland), Ruxolitinib 599 (JAK inhibitor, Cat N°7064, Biotechne), anti-mouse Oncostatin M (R&D systems), anti- 600 mouse IL-6 (BioxCell), recombinant mouse Oncostatin M and IL-6 (Biolegend, Cat #: 601 762802 & 575702 respectively).

602

603 **Antibodies.** The following anti-mouse antibodies were used following manufacturer's  
604 instructions: anti-CD16/CD32 Fc blocking antibody (BD Biosciences), anti-CD24-FITC  
605 (clone M1/69, eBioscience), anti-CD29-PE and-PE-Cy5 (clone HM $\beta$ 1-1, BioLegend), anti-  
606 Sca-1-APC (clone D7, eBioscience), anti-CD61-Alexa 647 (clone 2C9.62(HM $\beta$ 3-1),  
607 BioLegend, anti-CD45-PE (clone 30-F11, BD Biosciences), anti-Gr1-eFlour450 (clone  
608 RB6-8C5,eBioscience), anti-Ly6C FITC (clone HK1.4, BioLegend), anti-Ly6G-APC (clone  
609 1A8-Ly6g,eBioscience), anti-F4/80 PerCP/Cy5 (clone BM8, eBioscience), anti-CD11b-PE-  
610 Cy7 (clone M1/70,eBioscience), anti-CD11c-APC-eFluor780 (clone N418, eBioscience),  
611 anti-CD4-FITC (clone 6K1.5, eBioscience), anti-CD8-PE (clone 53-6.7, eBioscience), anti-  
612 B220-APC (clone RA3-6B2, eBioscience), anti-CD49b-eFlour450 (clone DX5, BioLegend),  
613 Annexin V-APC (clone B217656, BioLegend), Propidium Iodide-PerCP (Clone V13245,  
614 Life technologies).

615  
616 **Magnetic cell sorting (MACS).** MACS separators were used for positive and negative cell  
617 selections based on manufacturer's instructions. Briefly, cells were counted and resuspend  
618 in 500  $\mu$ l of MACS buffer with 10  $\mu$ l of fluorescent coupled antibody of interest (APC-  
619 conjugated anti-Sca-1 and PE-conjugated anti-Gr1) per  $10^7$  cells added. Cells were  
620 incubated for 30 minutes in the dark at 4°C and then washed with MACS buffer. After  
621 centrifugation and resuspension in 80  $\mu$ l of MACS buffer per  $10^7$  cells, 20  $\mu$ l of anti- APC-  
622 conjugated magnetic beads (Miltenyi Biotec) per  $10^7$  cells was added. After a 20 minutes  
623 incubation in the dark at 4°C, cells were washed with MACS buffer. After the centrifugation  
624 they were resuspended in MACS buffer and the magnetic separation was performed using  
625 LS MACS column (maximum  $10^8$  labeled cells) for positive selection and LD MACS column  
626 (maximum  $10^8$  labeled cells) for negative selection (Miltenyi Biotec). The purity of positive  
627 subpopulation was >70% and <99% for the negative subpopulation.

628

629 **Co-culture of Gr1<sup>+</sup>CD11b<sup>+</sup> cells sorted from tumors or spleen of 4T1 tumor bearing**  
630 **mice.** Gr1<sup>+</sup> cells were sorted from tumors or spleen at day 23 post-injection (see below  
631 Magnetic beads cell sorting section). Afterwards, 1.5x10<sup>5</sup> 4T1 cells were co-cultured in 6  
632 wells plates using Transwell plates (0.4 μm, Nunc, ThermoFisher Scientific) with  
633 Gr1<sup>+</sup>CD11b<sup>+</sup> sorted cells (top) and 4T1 cells (bottom) at different 4T1: Gr1<sup>+</sup>CD11b<sup>+</sup> ratios  
634 (1:1, 1:3 and 1:5). After 48 hours of co-culture, cells were analyzed for Sca-1 expression  
635 and gene expression by flow cytometry and semi-quantitative real-time qPCR as indicated.

636

637 **Flow cytometry analysis on tissue samples.** Mice were sacrificed at different time points  
638 for blood and tumors collection. Tumors were cut in small pieces with scissors, washed,  
639 and digested in serum free medium supplemented with Collagenase I and DNase I  
640 (Roche). The mixture was incubated at 37 °C for 45 minutes on a shaking platform.  
641 Subsequently, serum-supplemented medium was added to neutralize the enzymatic  
642 reaction and the tissue suspensions were filtered through a 100 μm and a 70 μm sterile  
643 nylon gauzes. Upon centrifugation (5 minutes at 1400 rpm), pellets were recovered and  
644 red blood cells lysed with ACK buffer (Biolegend). The staining procedure and the flow  
645 cytometry acquisition are as described previously (81). Data acquisition was performed  
646 using the FACSCalibur (BD Biosciences) or MACSQuant flow cytometer from Miltenyi  
647 Biotec and data analyzed by FlowJo v10.0.7 (tree Stat Inc.).

648

649 ***In vitro* cell proliferation assay.** Cells were collected and seeded in tissue culture 96-  
650 wells-plates (Costar) at 3'000 cells/well. Cells were grown in complete medium for 24, 36,  
651 72 and 96 hours. At each time point cells were washed once with PBS, then fixed with 4%  
652 PFA and stained with 0.5% crystal violet solution for 0.5 hours. The stained cells were

653 gently washed with deionized water to remove the extra dye and air-dried overnight at  
654 room temperature. After solubilizing the dye with crystal violet eluting buffer (70% ethanol  
655 and 1% acetic acid), cell viability was assessed by reading the absorbance at 595 nm  
656 wavelength in a multiwell plate reader (Modulus II microplate reader, Turner Biosystems).  
657 Results were analyzed by Prism (Graph pad software, Inc.) expressed as mean values of  
658 optical density (OD) of octuplet determinations  $\pm$  SEM.

659  
660 ***In vitro* cytotoxic assay.** Tumor cells were plated at a concentration of 3'000 cell/well into  
661 96-wells plates. The following day, a series of concentrations of the different drugs were  
662 supplemented to the culture medium. Untreated control cells were kept in normal culture  
663 medium. Cell viability of each well was assessed with crystal violet staining 48 hours after  
664 treatment, as described above. Results were analyzed by Prism software by a non-linear  
665 regression analysis and expressed as relative cell viability compared with non-treated  
666 control. The 50% maximum inhibition concentrations (IC<sub>50</sub>) were used to determine the  
667 drug-resistant ability of treated cells.

668  
669 **Real-time reverse transcription qPCR and primers.** Changes in mRNA expression  
670 levels were determined by semi-quantitative real-time qPCR. RNA samples were obtained  
671 from adherent cells using RNeasy kit from QIAGEN according to manufacturer's  
672 instructions. From each sample, 1  $\mu$ g RNA was retro-transcribed using SuperScript II  
673 Reverse Transcriptase kit (Life Technologies – Invitrogen), according to manufacturer's  
674 instructions. The reactions were performed in a StepOnePlus™ thermocycler (Applied  
675 Biosystems, Life Technologies – Invitrogen) using the KapaSYBR® FAST SYBR Green  
676 Master Mix (Kapa Biosystems). Each reaction was performed in triplicates and values were  
677 normalized to murine 36B4 housekeeping gene. The comparative C<sub>t</sub> method was used to

678 calculate the difference of gene expression between samples. The following murine-  
679 specific primers (Microsynth AG) were used:

680 Sca-1 (F:5'-TCAGGAGGCAGCAGTTATTGTG-3',R: 5'-TGGCAACAGGAAGTCTTCACG-  
681 3'), 36B4(F:5'-GTGTGTCTGCAGATCGGGTAC-3',R:5'-CAGATGGATCAGCCAGGAAG-  
682 3'), OSM (F: 5'- ATGCAGACACGGCTTCTAAGA-3', R: 5'- TTGGAGCAGCCACGATTG  
683 G-3'), OSMR: (F: 5'- CATCCCGAAGCGAAGTCTTGG-3', R: 5'-  
684 GGCTGGGACAGTCCATTC TAAA-3'), IL-6: (F: 5'- TACCACTTCACAAGTCGGAGGC-3',  
685 R: 5'- CTGCAAGTGCATCAT CGTTGTTC-3').

686  
687 **Histopathology.** Tumors and lungs were harvested at the end of the experiments, fixed in  
688 formalin and embedded in paraffin. 5 µm thick serial sections were cut from the tissue  
689 blocks. 3-4 sections taken at 100 µm distance were stained with hematoxylin and eosin  
690 (H&E) and used to assess tumor morphology and quantify lung metastasis. Slides were  
691 scanned by Nanozoomer (Hamamatsu Photonics) and metastasis were counted manually  
692 using NDP.viewer2 software (Hamamatsu Photonics). Metastatic index was calculated by  
693 normalizing the metastasis number with the volume of primary tumor.

694  
695 **Mammosphere-forming assay** 5'000 cells/well were seeded in non-adhesive U bottom  
696 96-wells plate in a semi-solid MEGM medium supplemented with 20 ng/ml EGF, and 20  
697 ng/ml bFGF and heparin. Medium was gently replaced every 3 to 4 days. After 11 to 14  
698 days culture, mammospheres of 50 to 150 µm diameter were detected under the  
699 microscope (bright field) and counted to quantify the sphere formation efficiency (SFE) as  
700 percentage of the initial number of seeded cells per well.

701

702 **Bulk RNA sequencing and data analysis.** Four independent sorts of 4T1-Sca-1<sup>+</sup> and  
703 4T1-Sca-1<sup>-</sup> cells (as described in the magnetic cell sorting section) or four independent 4T1  
704 cells primed with Tu-Gr1<sup>+</sup>CD11b<sup>+</sup> or Spl-Gr1<sup>+</sup>CD11b<sup>+</sup> were prepared. RNAs of these cells  
705 were isolated using the NucleoSpin RNA protocol of Macherey-Nagel (as described in real-  
706 time (RT) qPCR and primers section). Samples were normalized for 1 µg RNA in a volume  
707 of 20 µl, sequenced on the NextSeq500 sequencer using the NextSeq 500/550 HT reagent  
708 v2 kit (Illumina) at the Swiss Integrative Center for Human Health (SICHH) in Fribourg, or  
709 the Lausanne Genomics Technologies Facility (GTF, UNIL) in Lausanne, Switzerland. For  
710 data analysis, all sequencing reads were processed for quality control, removal of low  
711 quality reads, adaptor sequence and ribosomal RNA by fastqc(0.11.8) (82), multiqc (1.9)  
712 (83), Trimmomatic (0.39) (84) and SortMeRNA(2.1) (85) accordingly. The filtered reads  
713 were mapped to the reference genome (mm10) using htseq-count (0.6.1) (86) or Salmon  
714 (0.99.0) (87). The normalization of the read counts and the analysis of the differential  
715 expression between the groups of samples were performed with in R(v4.1.3), a free  
716 software environment available at <https://www.r-project.org/> using packages DESeq2  
717 (v3.15) (88). Pathway enrichment analysis was performed using packages GSVA(1.42.0)  
718 (89) and GSEABase(1.56.0) (90) with the input of DESeq2 normalized count numbers  
719 using ssgsea method comparing the Hallmark genesets from MSigDB (v7.4.1) (91) with  
720 default settings. The significant altered pathways were determined by computing  
721 moderated t-statistics and false discovery rates with the limma(3.50.3)(92) for pair-wised  
722 comparison. The heatmaps were produced with R package pheatmap(1.0.12)(93) with  
723 default settings while pathway hierarchy clustering was performed by similarity based on  
724 Euclidean distance and the ward aggregation algorithm. The Sca1 Positive and Sca1  
725 Negative signatures were extracted from the top 200 most upregulated or downregulated  
726 genes in 4T1-Sca-1<sup>+</sup> and 4T1-Sca-1<sup>-</sup> RNAseq data, respectively, with the threshold of

727 adjusted p-value  $<0.05$ , fold change  $>1.5$  or  $<-1.5$  and average normalized count number  
728  $>20$ . For Venn diagram, the genes fulfilling the threshold of adjusted p-value  $< 0.05$ , fold  
729 change  $> 1.5$  or  $< -1.5$  and average normalized count number  $>20$  are compared. The  
730 figures were produced with R package `venn` (1.10) (94) . Further analysis and figures  
731 generation were performed in R using packages `tidyverse`(1.3.1)(95), `ggplot2`(3.3.6) (96),  
732 `circlize`(0.4.15) (97), `biomaRt`(2.50.3) (98, 99), `RColorBrewer` (1.1-3) (100), `clusterProfiler`  
733 (4.2.2) (101, 102), `enrichplot` (1.14.2) (103), `ggpubr`(v0.4.0)(104) `ggbreak` (0.1.0) (104).

734  
735 **Microarray hybridization and data analysis** Experiments were performed as previously  
736 described (105). Briefly, triplicates wells of cultured 4T1 and MR13 cells were used for RNA  
737 extraction using RNeasy kit (QIAGEN). Probe synthesis and GeneChip Mouse Gene Exon  
738 1.0 ST Array (Affymetrix Ltd) hybridization were performed at the GTF, UNIL, Lausanne,  
739 Switzerland. Microarray analyses were carried out with R. After quantification of gene  
740 expression with robust multi-array normalization (99) using the BioConductor package `Affy`,  
741 (<http://www.bioconductor.org/>) significance of differential gene expression was determined  
742 by computing moderated t-statistics and false discovery rates with the `limma` package (92).  
743 Annotation was based on the genome version NCBI Build 36 (Feb. 2006). The obtained p-  
744 values were corrected for multiple testing by calculating estimated false discovery rates  
745 (FDR) using the method of Benjamini-Hochberg. Heatmaps were produced by color-coding  
746 gene-wise standardized log gene expression levels (mean zero standard deviation one).  
747 Probe-sets were shown hierarchically clustered by similarity based on Euclidean distance  
748 and the ward aggregation algorithm.

749  
750 **Public RNAseq data analysis** The RPKM normalized gene expression data in Ross  
751 dataset (GSE150928) from multiple murine models of breast cancer metastasis was



752 obtained from Gene Expression Omnibus (GEO) in the NCBI data repository. The data  
753 were analyzed and plot with R package tidyverse(1.3.1)(95), ggplot2 (3.3.6) (96) and  
754 ggpubr (v0.4.0) (106). The single-cell RNAseq data in Sebastian dataset (43) was obtained  
755 from Dryad data repository (<https://doi.org/10.6071/M3238R>). The data were analyzed with  
756 R package Seurat (3.0) (107). The tumor and different myeloid cell populations were  
757 extracted for cell-cell interaction analysis using CellPhonDB (2.0) (44). The identified  
758 interaction pairs were extracted and plot using circlize (0.4.15) (97) and ComplexHeatmap  
759 (2.11.2) (108). The ligands and receptors annotated in the circular plot were compiled from  
760 databases in CellTalkDB(109), SingleCellSignalR (110). To investigate the tumor cell  
761 dynamics, datasets for 4T1 (GSE158844 and GSM3502134) and MCF-7 (GSM4681765  
762 and GSM5904917) were obtained from GEO. The data were filtered and normalized  
763 separately before merging with IntegrateData function included in Seurat. Cell cycle  
764 regression was performed according to the standard protocol of Seurat. For MCF-7, due  
765 the huge difference of the sample size, 2000 cells were randomly selected from  
766 GSM4681765 data, and then merged with GSM5904917. Single-cell trajectories analysis  
767 was performed with monocle 3 (111–114) with default settings and the root and start point  
768 were selected manually for pseudotime calculation. The GSEA analysis of selected clusters  
769 was performed with R package fgsea(115) and the gene rank was calculated with Wilcoxon  
770 rank sum test and auROC analysis using wilcoxauc function included in presto package.  
771 The Tu-Gr1<sup>+</sup>CD11b<sup>+</sup>-induced signature was extracted by comparing gene expression  
772 between Tu-Gr1<sup>+</sup>CD11b<sup>+</sup> and Spl-Gr1<sup>+</sup>CD11b<sup>+</sup>-educated 4T1 cells with adjusted p-value  
773 <0.05, fold change >2, and the top 50 genes were selected.

774

775 **Clinical data analysis.** To validate our finding in clinical data, the human orthologs of  
776 murine Tu-Gr1<sup>+</sup>CD11b<sup>+</sup>-induced signature genes were used. Conversion from murine to



777 human gene symbols and Entrez IDs was performed with the biomaRt package (2.46.3)  
778 (98, 99), using the reference mart <https://dec2021.archive.ensembl.org>. Molecular  
779 Taxonomy of Breast Cancer International Consortium (METABRIC) breast cancer data  
780 was downloaded from cBioPortal (116–118) in August 2022, and expression data was log<sub>2</sub>  
781 transformed. Expression values were stratified in two groups by median values. Survival  
782 curves were generated using the ggsurvplot function from the survminer package  
783 (0.4.9)(106), and were compared between groups using a log-rank test. Survival curves  
784 were created using the survfit function from the survival package (3.2.11) (119). Cox  
785 proportional hazard regression model was performed through the coxph function of the  
786 same package.

787  
788 **Statistical analyses.** Unless specified, the data were presented as mean ± SEM from at  
789 least 3 independent experiments, unless otherwise indicated. Statistical comparisons  
790 were performed by an unpaired Student's t test with a two-tailed distribution, one-way  
791 ANOVA analysis of variance with Bonferroni post-test or two-way ANOVA with Tukey's or  
792 Dunnett's multiple comparison test using Prism 7.0 GraphPad Software, Inc. or R package  
793 ggpubr (v0.4.0)(104).

794  
795 **Graphic illustrations.** Illustrative schemes were created with BioRender.com.

796  
797 **Data and code availability.** The raw and processed bulk RNAseq data used to generate  
798 figures in Figure 3 and Supplemental Figure 5 and microarray data used to generate figures  
799 in Figure 7 have been deposited in the GEO database under the access code  
800 GSEXXXXXX. The code used for the analyses is open-source and available through with  
801 R packages described in methods.

802

### 803 **Author contributions**

804 Conceptualization, S.P., Q.L., C.R.; Methodology, S.P., N.F., Q.L., C.R.; Software, A.K.,  
805 N.F., Q.L.; Validation, S.P., M.B., A.K., Q.L.; Formal analysis, S.P., M.B., A.K., Q.L.;  
806 Investigation, S.P., M.B., A.K., O.C., Y-T.H., N.D., L.G., Q.L.; Resources, S.P., M.B., A.K.,  
807 O.C., N.D., L.G., G.L.; Data Curation, S.P., M.B., A.K., N.D., Q.L., C.R.; Writing – original  
808 draft preparation, S.P., Q.L., C.R.; Writing – review and editing, S.P., M.B., A.K., Y-T.H.,  
809 G.L., N.D., Q.L., C.R.; Visualization, S.P., M.B., A.K., Q.L., C.R.; Supervision, S.P., Q.L.,  
810 C.R.; Project administration, Q.L., C.R.; Funding acquisition, C.R.

811

### 812 **Acknowledgments**

813 The authors wish to thank Sarah Cattin and Melissa Rizzo for assistance with FACS  
814 analysis, Dr. Ana-Marija Sulić (Institute of Biotechnology, HiLIFE, University of Helsinki) for  
815 the insightful discussion about scRNA-seq data analysis, Dr. Fred R. Miller (Michigan  
816 Cancer Foundation, Detroit, MI, USA) for providing 4T1 cells, Dr. Khalil Zaman (Department  
817 of Oncology, University Hospital, University of Lausanne, Lausanne, Switzerland) for  
818 providing chemotherapeutic drugs. This work was supported by grants from the Swiss  
819 National Science Foundation (31003A\_179248; 310030\_208136), the Swiss Cancer  
820 League (KFS 4400-02-2018) and the Medic Foundation (to C.R.).

821

### 822 **References**

823 1. Fares J, Fares MY, Khachfe HH, Salhab HA, Fares Y. Molecular principles of  
824 metastasis: a hallmark of cancer revisited. *Signal Transduct. Target. Ther.* 2020;5(1):1–  
825 17.

- 826 2. Valdés-Mora F et al. Single-cell transcriptomics reveals involution mimicry during the  
827 specification of the basal breast cancer subtype. *Cell Rep.* 2021;35(2):108945.
- 828 3. Yang D et al. Lineage tracing reveals the phylodynamics, plasticity, and paths of tumor  
829 evolution. *Cell* 2022;185(11):1905-1923.e25.
- 830 4. Torborg SR, Li Z, Chan JE, Tammela T. Cellular and molecular mechanisms of  
831 plasticity in cancer. *Trends Cancer* 2022;8(9):735–746.
- 832 5. Baccelli I, Trumpp A. The evolving concept of cancer and metastasis stem cells. *J. Cell*  
833 *Biol.* 2012;198(3):281–293.
- 834 6. Lawson DA, Kessenbrock K, Davis RT, Pervolarakis N, Werb Z. Tumour heterogeneity  
835 and metastasis at single-cell resolution. *Nat. Cell Biol.* 2018;20(12):1349–1360.
- 836 7. Celià-Terrassa T, Jolly MK. Cancer Stem Cells and Epithelial-to-Mesenchymal  
837 Transition in Cancer Metastasis. *Cold Spring Harb. Perspect. Med.* 2020;10(7):a036905.
- 838 8. Dagogo-Jack I, Shaw AT. Tumour heterogeneity and resistance to cancer therapies.  
839 *Nat. Rev. Clin. Oncol.* 2018;15(2):81–94.
- 840 9. McDonald K-A et al. Tumor Heterogeneity Correlates with Less Immune Response  
841 and Worse Survival in Breast Cancer Patients. *Ann. Surg. Oncol.* 2019;26(7):2191–2199.
- 842 10. Hata AN et al. Tumor cells can follow distinct evolutionary paths to become resistant  
843 to epidermal growth factor receptor inhibition. *Nat. Med.* 2016;22(3):262–269.
- 844 11. Ramirez M et al. Diverse drug-resistance mechanisms can emerge from drug-tolerant  
845 cancer persister cells. *Nat. Commun.* 2016;7(1):10690.

- 846 12. Oskarsson T, Batlle E, Massagué J. Metastatic stem cells: sources, niches, and vital  
847 pathways. *Cell Stem Cell* 2014;14(3):306–321.
- 848 13. Ye F et al. CD49f Can Act as a Biomarker for Local or Distant Recurrence in Breast  
849 Cancer. *J. Breast Cancer* 2017;20(2):142–149.
- 850 14. Vaillant F et al. The Mammary Progenitor Marker CD61/β3 Integrin Identifies Cancer  
851 Stem Cells in Mouse Models of Mammary Tumorigenesis. *Cancer Res.*  
852 2008;68(19):7711–7717.
- 853 15. Li JJ, Tsang JY, Tse GM. Tumor Microenvironment in Breast Cancer—Updates on  
854 Therapeutic Implications and Pathologic Assessment. *Cancers* 2021;13(16):4233.
- 855 16. Ge R, Wang Z, Cheng L. Tumor microenvironment heterogeneity an important  
856 mediator of prostate cancer progression and therapeutic resistance. *Npj Precis. Oncol.*  
857 2022;6(1):1–8.
- 858 17. Peng D et al. Myeloid-Derived Suppressor Cells Endow Stem-like Qualities to Breast  
859 Cancer Cells through IL6/STAT3 and NO/NOTCH Cross-talk Signaling. *Cancer Res.*  
860 2016;76(11):3156–3165.
- 861 18. Li K et al. Myeloid-derived suppressor cells as immunosuppressive regulators and  
862 therapeutic targets in cancer. *Signal Transduct. Target. Ther.* 2021;6(1):1–25.
- 863 19. Lorusso G, Ruegg C. The tumor microenvironment and its contribution to tumor  
864 evolution toward metastasis. *Histochem Cell Biol* 2008;130(6):1091–103.
- 865 20. Sleeman JP et al. Concepts of metastasis in flux: the stromal progression model.  
866 *Semin Cancer Biol* 2012;22(3):174–86.

- 867 21. Cha YJ, Koo JS. Role of Tumor-Associated Myeloid Cells in Breast Cancer. *Cells*  
868 2020;9(8). doi:10.3390/cells9081785
- 869 22. Pastaki Khoshbin A, Eskian M, Keshavarz-Fathi M, Rezaei N. Roles of Myeloid-  
870 Derived Suppressor Cells in Cancer Metastasis: Immunosuppression and Beyond. *Arch*  
871 *Immunol Ther Exp Warsz* 2019;67(2):89–102.
- 872 23. Panni RZ et al. Tumor-induced STAT3 activation in monocytic myeloid-derived  
873 suppressor cells enhances stemness and mesenchymal properties in human pancreatic  
874 cancer. *Cancer Immunol. Immunother.* 2014;63(5):513–528.
- 875 24. Cui TX et al. Myeloid-derived suppressor cells enhance stemness of cancer cells by  
876 inducing microRNA101 and suppressing the corepressor CtBP2. *Immunity*  
877 2013;39(3):611–621.
- 878 25. Abaurrea A, Araujo AM, Caffarel MM. The Role of the IL-6 Cytokine Family in  
879 Epithelial–Mesenchymal Plasticity in Cancer Progression. *Int. J. Mol. Sci.*  
880 2021;22(15):8334.
- 881 26. Zarling JM et al. Oncostatin M: a growth regulator produced by differentiated  
882 histiocytic lymphoma cells. *Proc. Natl. Acad. Sci. U. S. A.* 1986;83(24):9739–9743.
- 883 27. Felcher CM, Bogni ES, Kordon EC. IL-6 Cytokine Family: A Putative Target for  
884 Breast Cancer Prevention and Treatment. *Int J Mol Sci* 2022;23(3).  
885 doi:10.3390/ijms23031809
- 886 28. Johnson DE, O’Keefe RA, Grandis JR. Targeting the IL-6/JAK/STAT3 signalling axis  
887 in cancer. *Nat Rev Clin Oncol* 2018;15(4):234–248.

- 888 29. Quintas-Cardama A, Verstovsek S. Molecular pathways: Jak/STAT pathway:  
889 mutations, inhibitors, and resistance. *Clin Cancer Res* 2013;19(8):1933–40.
- 890 30. Tawara K et al. HIGH expression of OSM and IL-6 are associated with decreased  
891 breast cancer survival: synergistic induction of IL-6 secretion by OSM and IL-1beta.  
892 *Oncotarget* 2019;10(21):2068–2085.
- 893 31. West NR, Murphy LC, Watson PH. Oncostatin M suppresses oestrogen receptor- $\alpha$   
894 expression and is associated with poor outcome in human breast cancer. *Endocr. Relat.*  
895 *Cancer* 2012;19(2):181–195.
- 896 32. Guo L et al. Stat3-coordinated Lin-28-let-7-HMGA2 and miR-200-ZEB1 circuits  
897 initiate and maintain oncostatin M-driven epithelial-mesenchymal transition. *Oncogene*  
898 2013;32(45):5272–5282.
- 899 33. Araujo AM et al. Stromal oncostatin M cytokine promotes breast cancer progression  
900 by reprogramming the tumor microenvironment. *J Clin Invest* 2022;132(7).  
901 doi:10.1172/JCI148667
- 902 34. Bryson BL, Junk DJ, Cipriano R, Jackson MW. STAT3-mediated SMAD3 activation  
903 underlies Oncostatin M-induced Senescence. *Cell Cycle* 2017;16(4):319–334.
- 904 35. Taniguchi K, Karin M. IL-6 and related cytokines as the critical lynchpins between  
905 inflammation and cancer. *Semin. Immunol.* 2014;26(1):54–74.
- 906 36. West NR, Murray JI, Watson PH. Oncostatin-M promotes phenotypic changes  
907 associated with mesenchymal and stem cell-like differentiation in breast cancer.  
908 *Oncogene* 2014;33(12):1485–1494.

- 909 37. Ross C et al. Metastasis-Specific Gene Expression in Autochthonous and Allograft  
910 Mouse Mammary Tumor Models: Stratification and Identification of Targetable  
911 Signatures. *Mol. Cancer Res. MCR* 2020;18(9):1278–1289.
- 912 38. Fico F, Bousquenaud M, Rüegg C, Santamaria-Martínez A. Breast Cancer Stem  
913 Cells with Tumor- versus Metastasis-Initiating Capacities Are Modulated by TGFBR1  
914 Inhibition. *Stem Cell Rep.* 2019;13(1):1–9.
- 915 39. Hanahan D. Hallmarks of Cancer: New Dimensions. *Cancer Discov.* 2022;12(1):31–  
916 46.
- 917 40. Ouzounova M et al. Monocytic and granulocytic myeloid derived suppressor cells  
918 differentially regulate spatiotemporal tumour plasticity during metastatic cascade. *Nat.*  
919 *Commun.* 2017;8(1):14979.
- 920 41. Veglia F, Sanseviero E, Gabrilovich DI. Myeloid-derived suppressor cells in the era of  
921 increasing myeloid cell diversity. *Nat. Rev. Immunol.* 2021;21(8):485–498.
- 922 42. Bronte V et al. Recommendations for myeloid-derived suppressor cell nomenclature  
923 and characterization standards. *Nat. Commun.* 2016;7(1):12150.
- 924 43. Sebastian A et al. Single-Cell Transcriptomic Analysis of Tumor-Derived Fibroblasts  
925 and Normal Tissue-Resident Fibroblasts Reveals Fibroblast Heterogeneity in Breast  
926 Cancer. *Cancers* 2020;12(5):1307.
- 927 44. Efremova M, Vento-Tormo M, Teichmann SA, Vento-Tormo R. CellPhoneDB:  
928 inferring cell–cell communication from combined expression of multi-subunit ligand–  
929 receptor complexes. *Nat. Protoc.* 2020;15(4):1484–1506.

- 930 45. Brandizzi F, Barlowe C. Organization of the ER–Golgi interface for membrane traffic  
931 control. *Nat. Rev. Mol. Cell Biol.* 2013;14(6):382–392.
- 932 46. Chen K et al. Phenotypically supervised single-cell sequencing parses within-cell-  
933 type heterogeneity. *iScience* 2021;24(1):101991.
- 934 47. Yeo SK et al. Single-cell RNA-sequencing reveals distinct patterns of cell state  
935 heterogeneity in mouse models of breast cancer. *eLife* 2020;9:e58810.
- 936 48. Aouad P et al. Epithelial-mesenchymal plasticity determines estrogen receptor  
937 positive breast cancer dormancy and epithelial reconversion drives recurrence. *Nat.*  
938 *Commun.* 2022;13(1):4975.
- 939 49. Jin W. Role of JAK/STAT3 Signaling in the Regulation of Metastasis, the Transition of  
940 Cancer Stem Cells, and Chemoresistance of Cancer by Epithelial–Mesenchymal  
941 Transition. *Cells* 2020;9(1):217.
- 942 50. Junk DJ et al. Oncostatin M promotes cancer cell plasticity through cooperative  
943 STAT3-SMAD3 signaling. *Oncogene* 2017;36(28):4001–4013.
- 944 51. Naz F, Shi M, Sajid S, Yang Z, Yu C. Cancer stem cells: a major culprit of intra-tumor  
945 heterogeneity. *Am. J. Cancer Res.* 2021;11(12):5782–5811.
- 946 52. Zhang R, Tu J, Liu S. Novel molecular regulators of breast cancer stem cell plasticity  
947 and heterogeneity. *Semin Cancer Biol* 2022;82:11–25.
- 948 53. Qin S et al. Emerging role of tumor cell plasticity in modifying therapeutic response.  
949 *Signal Transduct. Target. Ther.* 2020;5(1):228.



- 950 54. Kong D, Hughes CJ, Ford HL. Cellular Plasticity in Breast Cancer Progression and  
951 Therapy. *Front. Mol. Biosci.* 2020;7:72.
- 952 55. Muzio G, Maggiora M, Paiuzzi E, Oraldi M, Canuto RA. Aldehyde dehydrogenases  
953 and cell proliferation. *Free Radic. Biol. Med.* 2012;52(4):735–746.
- 954 56. Curtis C et al. The genomic and transcriptomic architecture of 2,000 breast tumours  
955 reveals novel subgroups. *Nature* 2012;486(7403):346–352.
- 956 57. Shen M et al. A review of current progress in triple-negative breast cancer therapy.  
957 *Open Med Wars* 2020;15(1):1143–1149.
- 958 58. Al-Mahmood S, Sapiezynski J, Garbuzenko OB, Minko T. Metastatic and triple-  
959 negative breast cancer: challenges and treatment options. *Drug Deliv Transl Res*  
960 2018;8(5):1483–1507.
- 961 59. Azim HA, Ghosn M, Oualla K, Kassem L. Personalized treatment in metastatic triple-  
962 negative breast cancer: The outlook in 2020. *Breast J* 2020;26(1):69–80.
- 963 60. Vagia E, Mahalingam D, Cristofanilli M. The Landscape of Targeted Therapies in  
964 TNBC. *Cancers Basel* 2020;12(4). doi:10.3390/cancers12040916
- 965 61. Hua Z, White J, Zhou J. Cancer stem cells in TNBC. *Semin Cancer Biol* 2022;82:26–  
966 34.
- 967 62. Batlle E, Clevers H. Cancer stem cells revisited. *Nat Med* 2017;23(10):1124–1134.
- 968 63. Brooks MD, Burness ML, Wicha MS. Therapeutic Implications of Cellular  
969 Heterogeneity and Plasticity in Breast Cancer. *Cell Stem Cell* 2015;17(3):260–71.

- 970 64. Yeo SK, Wen J, Chen S, Guan JL. Autophagy Differentially Regulates Distinct Breast  
971 Cancer Stem-like Cells in Murine Models via EGFR/Stat3 and Tgfbeta/Smad Signaling.  
972 *Cancer Res* 2016;76(11):3397–410.
- 973 65. Gong J et al. Genotoxic stress induces Sca-1-expressing metastatic mammary  
974 cancer cells. *Mol. Oncol.* 2018;12(8):1249–1263.
- 975 66. Shimokawa M et al. Visualization and targeting of LGR5+ human colon cancer stem  
976 cells. *Nature* 2017;545(7653):187–192.
- 977 67. Oo MW et al. Resident stroma-secreted chemokine CCL2 governs myeloid-derived  
978 suppressor cells in the tumor microenvironment. *JCI Insight* 2022;7(1).  
979 doi:10.1172/jci.insight.148960
- 980 68. Franklin DA et al. MEK activation modulates glycolysis and supports suppressive  
981 myeloid cells in TNBC. *JCI Insight* 2020;5(15). doi:10.1172/jci.insight.134290
- 982 69. Bullock K, Richmond A. Suppressing MDSC Recruitment to the Tumor  
983 Microenvironment by Antagonizing CXCR2 to Enhance the Efficacy of Immunotherapy.  
984 *Cancers Basel* 2021;13(24). doi:10.3390/cancers13246293
- 985 70. Jovanovic IP et al. Interleukin-33/ST2 axis promotes breast cancer growth and  
986 metastases by facilitating intratumoral accumulation of immunosuppressive and innate  
987 lymphoid cells. *Int J Cancer* 2014;134(7):1669–82.
- 988 71. Szczerba BM et al. Neutrophils escort circulating tumour cells to enable cell cycle  
989 progression. *Nature* 2019;566(7745):553–557.

- 990 72. Doherty MR et al. The opposing effects of interferon-beta and oncostatin-M as  
991 regulators of cancer stem cell plasticity in triple-negative breast cancer. *Breast Cancer*  
992 *Res* 2019;21(1):54.
- 993 73. Cavalli LR, Riggins RB, Wang A, Clarke R, Haddad BR. Frequent loss of  
994 heterozygosity at the interferon regulatory factor-1 gene locus in breast cancer. *Breast*  
995 *Cancer Res. Treat.* 2010;121(1):227–231.
- 996 74. Weichselbaum RR et al. An interferon-related gene signature for DNA damage  
997 resistance is a predictive marker for chemotherapy and radiation for breast cancer. *Proc.*  
998 *Natl. Acad. Sci. U. S. A.* 2008;105(47):18490–18495.
- 999 75. Aljohani AI et al. Myxovirus resistance 1 (MX1) is an independent predictor of poor  
1000 outcome in invasive breast cancer. *Breast Cancer Res. Treat.* 2020;181(3):541–551.
- 1001 76. Chan JM et al. Lineage plasticity in prostate cancer depends on JAK/STAT  
1002 inflammatory signaling. *Science* 2022;377(6611):1180–1191.
- 1003 77. Deng S et al. Ectopic JAK–STAT activation enables the transition to a stem-like and  
1004 multilineage state conferring AR-targeted therapy resistance. *Nat. Cancer*  
1005 2022;3(9):1071–1087.
- 1006 78. Lynce F et al. Phase I study of JAK1/2 inhibitor ruxolitinib with weekly paclitaxel for  
1007 the treatment of HER2-negative metastatic breast cancer. *Cancer Chemother Pharmacol*  
1008 2021;87(5):673–679.
- 1009 79. Kearney M et al. Phase I/II trial of ruxolitinib in combination with trastuzumab in  
1010 metastatic HER2 positive breast cancer. *Breast Cancer Res Treat* 2021;189(1):177–185.

- 1011 80. O'Shaughnessy J et al. A randomized, double-blind, phase 2 study of ruxolitinib or  
1012 placebo in combination with capecitabine in patients with advanced HER2-negative  
1013 breast cancer and elevated C-reactive protein, a marker of systemic inflammation. *Breast*  
1014 *Cancer Res Treat* 2018;170(3):547–557.
- 1015 81. Lan Q et al. Type I interferon/IRF7 axis instigates chemotherapy-induced  
1016 immunological dormancy in breast cancer. *Oncogene* 2019;38(15):2814–2829.
- 1017 82. FASTQC. A quality control tool for high throughput sequence data | BibSonomy  
1018 [Internet]<https://www.bibsonomy.org/bibtex/f230a919c34360709aa298734d63dca3>. cited  
1019 October 15, 2022
- 1020 83. Ewels P, Magnusson M, Lundin S, Käller M. MultiQC: summarize analysis results for  
1021 multiple tools and samples in a single report. *Bioinformatics* 2016;32(19):3047–3048.
- 1022 84. Bolger AM, Lohse M, Usadel B. Trimmomatic: a flexible trimmer for Illumina  
1023 sequence data. *Bioinformatics* 2014;30(15):2114–2120.
- 1024 85. Kopylova E, Noé L, Touzet H. SortMeRNA: fast and accurate filtering of ribosomal  
1025 RNAs in metatranscriptomic data. *Bioinforma. Oxf. Engl.* 2012;28(24):3211–3217.
- 1026 86. Anders S, Pyl PT, Huber W. HTSeq—a Python framework to work with high-  
1027 throughput sequencing data. *Bioinformatics* 2015;31(2):166–169.
- 1028 87. Patro R, Duggal G, Love MI, Irizarry RA, Kingsford C. Salmon provides fast and bias-  
1029 aware quantification of transcript expression. *Nat. Methods* 2017;14(4):417–419.
- 1030 88. Love MI, Huber W, Anders S. Moderated estimation of fold change and dispersion for  
1031 RNA-seq data with DESeq2. *Genome Biol.* 2014;15(12):550.

- 1032 89. Hänzelmann S, Castelo R, Guinney J. GSVA: gene set variation analysis for  
1033 microarray and RNA-Seq data. *BMC Bioinformatics* 2013;14(1):7.
- 1034 90. Morgan M, Falcon S, Gentleman R. GSEABase: Gene set enrichment data structures  
1035 and methods. R package version 1.58.0.2022;
- 1036 91. Subramanian A et al. Gene set enrichment analysis: A knowledge-based approach  
1037 for interpreting genome-wide expression profiles. *Proc. Natl. Acad. Sci.*  
1038 2005;102(43):15545–15550.
- 1039 92. Ritchie ME et al. limma powers differential expression analyses for RNA-sequencing  
1040 and microarray studies. *Nucleic Acids Res.* 2015;43(7):e47.
- 1041 93. Kolde R. Pheatmap: pretty heatmaps. *R Package Version* 2012;1(2):726.
- 1042 94. Dusa, Adrian. Draw Venn Diagrams R package venn2016;
- 1043 95. Wickham H et al. Welcome to the Tidyverse. *J. Open Source Softw.* 2019;4(43):1686.
- 1044 96. Wickham H. *ggplot2 [Internet]*. New York, NY: Springer; 2009:
- 1045 97. Gu Z, Gu L, Eils R, Schlesner M, Brors B. circlize Implements and enhances circular  
1046 visualization in R. *Bioinforma. Oxf. Engl.* 2014;30(19):2811–2812.
- 1047 98. Durinck S et al. BioMart and Bioconductor: a powerful link between biological  
1048 databases and microarray data analysis. *Bioinforma. Oxf. Engl.* 2005;21(16):3439–3440.
- 1049 99. Durinck S, Spellman PT, Birney E, Huber W. Mapping identifiers for the integration of  
1050 genomic datasets with the R/Bioconductor package biomaRt. *Nat. Protoc.*  
1051 2009;4(8):1184–1191.
- 1052 100. Neuwirth E. RColorBrewer: ColorBrewer Palettes:5.

- 1053 101. Wu T et al. clusterProfiler 4.0: A universal enrichment tool for interpreting omics  
1054 data. *Innov. Camb. Mass* 2021;2(3):100141.
- 1055 102. Yu G, Wang L-G, Han Y, He Q-Y. clusterProfiler: an R package for comparing  
1056 biological themes among gene clusters. *Omic J. Integr. Biol.* 2012;16(5):284–287.
- 1057 103. Yu G, Hu E. enrichplot: Visualization of Functional Enrichment Result [Internet]2022;  
1058 doi:10.18129/B9.bioc.enrichplot
- 1059 104. Xu S et al. Use ggbreak to Effectively Utilize Plotting Space to Deal With Large  
1060 Datasets and Outliers. *Front. Genet.* 2021;12:774846.
- 1061 105. Monnier Y et al. CYR61 and alphaVbeta5 integrin cooperate to promote invasion  
1062 and metastasis of tumors growing in preirradiated stroma. *Cancer Res.*  
1063 2008;68(18):7323–7331.
- 1064 106. Kassambara A. ggpubr: “ggplot2” Based Publication Ready Plots  
1065 [Internet]2020;https://CRAN.R-project.org/package=ggpubr. cited October 15, 2022
- 1066 107. Stuart T et al. Comprehensive Integration of Single-Cell Data. *Cell*  
1067 2019;177(7):1888-1902.e21.
- 1068 108. Gu Z, Eils R, Schlesner M. Complex heatmaps reveal patterns and correlations in  
1069 multidimensional genomic data. *Bioinforma. Oxf. Engl.* 2016;32(18):2847–2849.
- 1070 109. Shao X et al. CellTalkDB: a manually curated database of ligand–receptor  
1071 interactions in humans and mice. *Brief. Bioinform.* 2021;22(4):bbaa269.
- 1072 110. Cabello-Aguilar S et al. SingleCellSignalR: inference of intercellular networks from  
1073 single-cell transcriptomics. *Nucleic Acids Res.* 2020;48(10):e55.

- 1074 111. Trapnell C et al. The dynamics and regulators of cell fate decisions are revealed by  
1075 pseudotemporal ordering of single cells. *Nat. Biotechnol.* 2014;32(4):381–386.
- 1076 112. Qiu X et al. Reversed graph embedding resolves complex single-cell trajectories.  
1077 *Nat. Methods* 2017;14(10):979–982.
- 1078 113. Cao J et al. The single-cell transcriptional landscape of mammalian organogenesis.  
1079 *Nature* 2019;566(7745):496–502.
- 1080 114. McInnes L, Healy J, Melville J. UMAP: Uniform Manifold Approximation and  
1081 Projection for Dimension Reduction [Internet]2020;<http://arxiv.org/abs/1802.03426>. cited  
1082 October 21, 2022
- 1083 115. Korotkevich G et al. Fast gene set enrichment analysis [Internet]2021;060012.
- 1084 116. Gao W et al. IL20RA signaling enhances stemness and promotes the formation of  
1085 an immunosuppressive microenvironment in breast cancer. *Theranostics*  
1086 2021;11(6):2564–2580.
- 1087 117. Cerami E et al. The cBio cancer genomics portal: an open platform for exploring  
1088 multidimensional cancer genomics data. *Cancer Discov.* 2012;2(5):401–404.
- 1089 118. Ramos M et al. Multiomic Integration of Public Oncology Databases in  
1090 Bioconductor. *JCO Clin. Cancer Inform.* 2020;(4):958–971.
- 1091 119. Therneau TM, Grambsch PM. *Modeling Survival Data: Extending the Cox Model*  
1092 [Internet]. New York, NY: Springer; 2000:
- 1093
- 1094



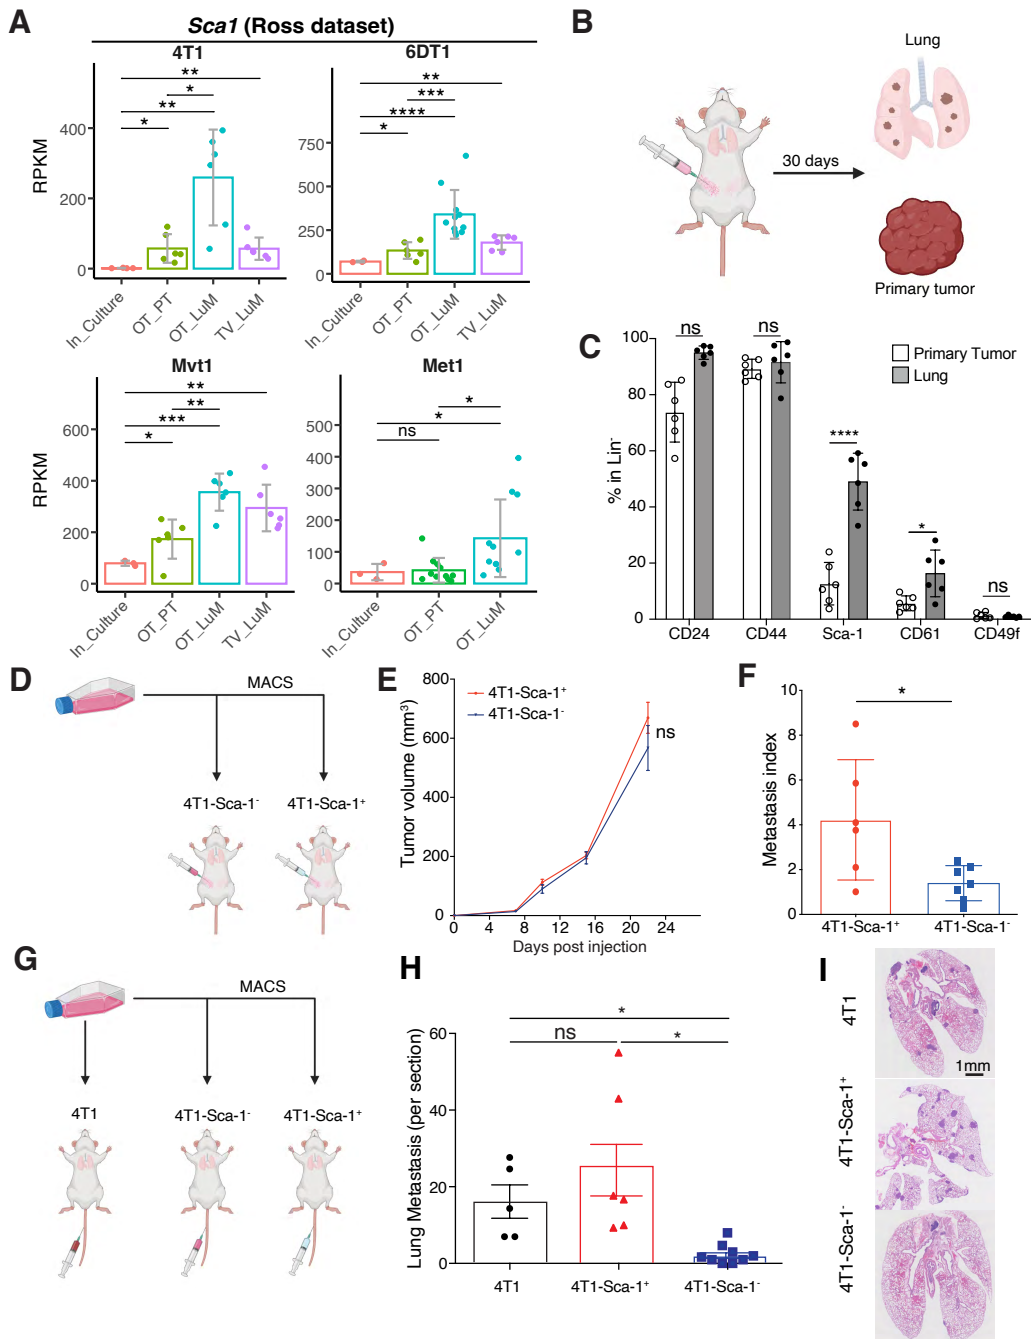

**Figure 1. *Sca1*<sup>+</sup> population is enriched during *in vivo* metastasis across multiple breast cancer models**

(A) *Sca1* mRNA expression in the metastatic murine breast cancer models 4T1, 6DT1, Mvt1 and Met1, extracted from the Ross dataset. Analyzed samples consist of cultured cells (In\_Culture), orthotopic injected primary tumors (OP\_PT), spontaneous lung metastases (OP\_LuM) and lung metastases induced by tail-vein injection (TV\_LuM). Data are presented as mean of Reads Per Kilobase of transcript per Million mapped reads (RPKM)  $\pm$  SD (unpaired two-tailed student's t test with Holm correction).

(B) Experimental set up for *in vivo* experimental validation. The 4T1 tumor cells were orthotopically injected into the 4th mammary fat pad. Thirty days later, cells from primary tumors and lungs were isolated to examine CSC marker expression by flow cytometry.

(C) Frequency of CSC marker expression in primary tumors and lung metastases. Results give the percentage of CD24, CD44, Sca-1, CD61 and CD49f positive cells gated in lineage negative cells (CD45<sup>-</sup>CD31<sup>-</sup>TER119<sup>-</sup>).

(D-F) Experimental set up (D) of the *in vivo* experiment to assess tumor growth (E) and lung metastatic ability (metastatic index) (F) of 4T1-Sca-1<sup>+</sup> and 4T1-Sca-1<sup>-</sup> populations isolated from parental 4T1 cells orthotopically injected into the 4th mammary fat pad. Metastases are assessed 21 days after tumor cell injection. n=8/group, 3 independent experiments.

(G-I) Experimental set up (G) of the *in vivo* experiment to assess lung colonization capacity of sorted parental 4T1, 4T1-Sca-1<sup>+</sup> and 4T1-Sca-1<sup>-</sup> cells by tail-vein injection. Lung metastatic nodule numbers (H) and representative images (I) of lungs from mice 10 days post injection (n=5-6, 2 independent experiments). Scale bar=1 mm.

Except A, data are represented as mean values  $\pm$  SEM. P values were calculated using unpaired two-tailed student's t test with Holm correction (A), unpaired two-tailed student's t test (C, F), two-way ANOVA with Tukey multiple-comparison test (E) or one-way ANOVA with Tukey multiple-comparison test (H). \*, p<0.05; \*\*, p<0.01; \*\*\*, p<0.001; \*\*\*\*, p<0.0001; ns, non-significant.

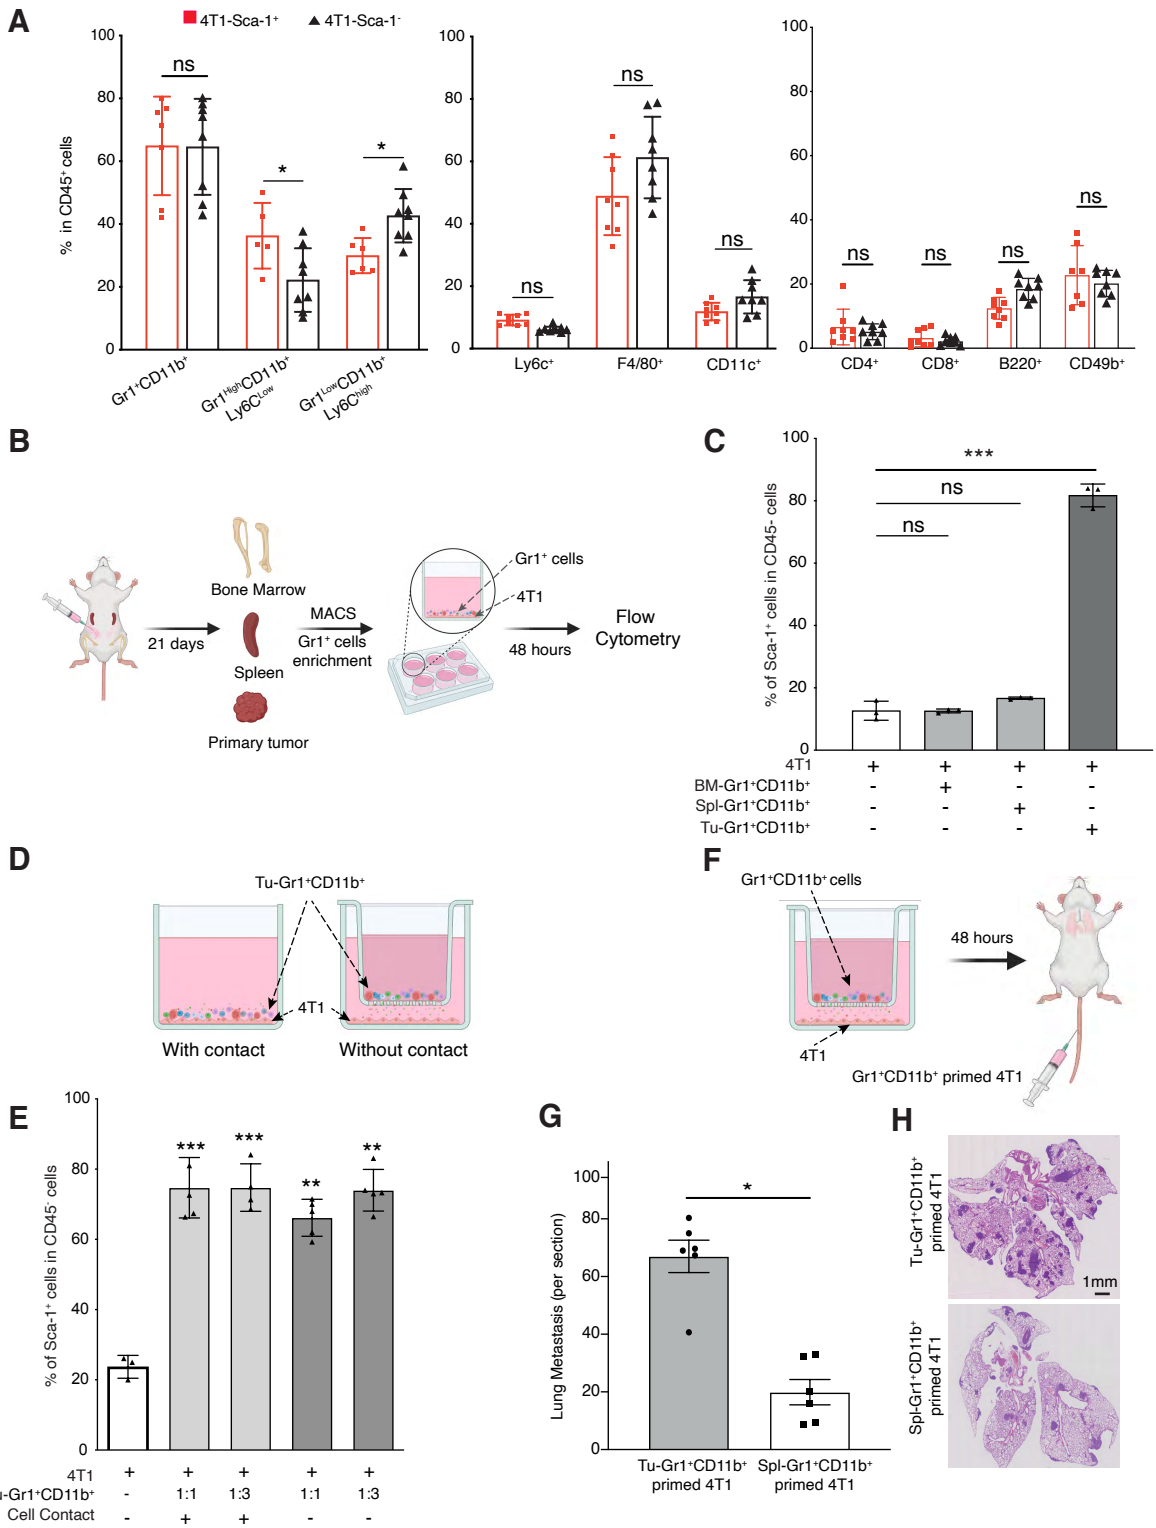

**Figure 2. Sca-1 expression is modulated by the tumor microenvironment**

## Figure 2. Sca-1 expression is modulated by the tumor microenvironment

**(A)** Frequency of different immune cell populations in primary tumors of mice orthotopically injected with 4T1-Sca-1<sup>+</sup> and 4T1-Sca-1<sup>-</sup> 21 days post injection. Populations are determined in CD45 negative, viable cells (n=8 mice/Group).

**(B-C)** Illustrative scheme **(B)** showing the experimental design for isolating Gr1<sup>+</sup> cells from different sites of tumor-bearing mice. Twenty-one days after tumor implantation, Gr1<sup>+</sup> cells were isolated from bone marrow (BM-Gr1<sup>+</sup>CD11b<sup>+</sup>), spleen (Spl- Gr1<sup>+</sup>CD11b<sup>+</sup>) or primary tumor (Tu-Gr1<sup>+</sup>CD11b<sup>+</sup>) and co-cultured for 48 hours with parental 4T1 cells in vitro. Sca-1 expression in tumor cells was examined by flow cytometry **(C)**. Co-cultures conditions are indicated in the bar graph (n=3/group).

**(D)** Illustrative scheme of the experimental co-culture setup.

**(E)** MACS-enriched Gr1<sup>+</sup> cells were cocultured with 4T1 cells with or without Transwell inserts of 0.4 μm pore size. The 4T1 cells were seeded in the bottom well and Gr1<sup>+</sup>CD11b<sup>+</sup> cells in the upper part of the insert. After 48 hours, 4T1 cells were examined for Sca1 expression by FACS. Co-cultures conditions are indicated in the bar graph. The ratio of tumor cells and Tu-Gr1<sup>+</sup>CD11b<sup>+</sup> is varied from 1:1 to 1:3.

Significant enrichment of Sca-1<sup>+</sup> population were observed in all conditions. n= 3-5/group.

**(F)** Illustrative scheme of the experimental metastasis setup.

**(G-H)** Evaluation of the metastatic capacity of Gr1<sup>+</sup>CD11b<sup>+</sup>-educated 4T1 cells in vivo. The 4T1 tumor cells were primed with Tu-Gr1<sup>+</sup>CD11b<sup>+</sup> or Spl-Gr1<sup>+</sup>CD11b<sup>+</sup> in vitro without cell-cell contact for 48 hours and injected into the tail vein of mice. Lung metastases were quantified 10 days after injection **(G)**, and representative H&E staining images of lung sections are showed **(H)**. Scale bar=1mm, n=7 mice/group.

Data are represented as mean values ± SEM from at least 3 independent experiments. P values were calculated using unpaired two-tailed student's t test **(A, G)**, one-way ANOVA with Dunnett's multiple-comparison test **(C, E)**. \*, p<0.05; \*\*, p< 0.01; \*\*\*, p< 0.001; ns, non-significant.

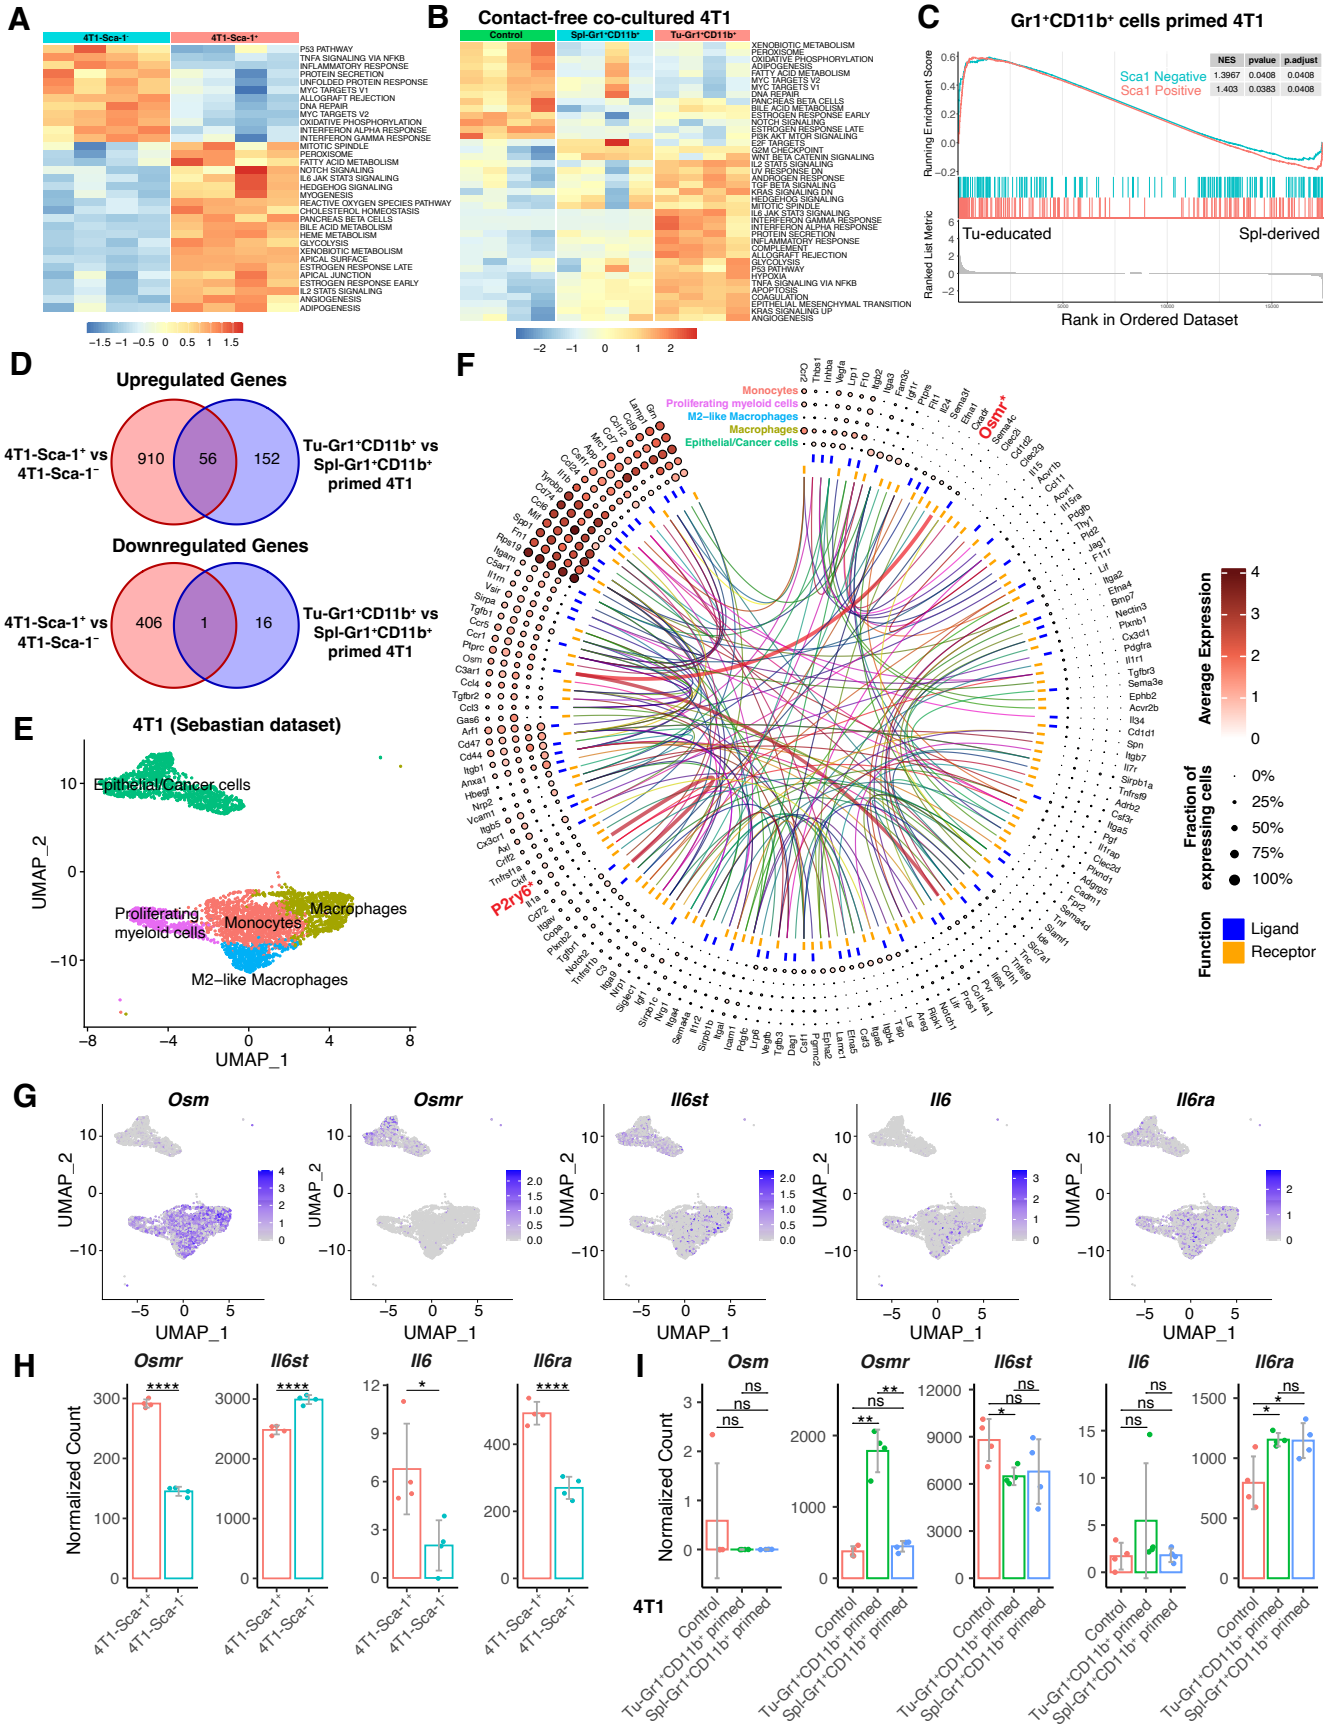

**Figure 3. Transcriptomic analysis of Sca-1<sup>+</sup> tumor cells**

### Figure 3. Transcriptomic analysis of Sca-1<sup>+</sup> tumor cells

**(A)** Heatmap showing the signature score of the hallmark pathways analysis in 4T1-Sca-1<sup>+</sup> and 4T1-Sca-1<sup>-</sup> population sorted from parental 4T1 cells. The colors code the expression levels relative to average levels as indicate at the bottom.

**(B)** Heatmap showing the signature score of the hallmarks pathway analysis in parental 4T1 (4T1), Spl-Gr1<sup>+</sup>CD11b<sup>+</sup> primed 4T1 and Tu-Gr1<sup>+</sup>CD11b<sup>+</sup> primed 4T1 cells. The colors code the expression levels relative to average levels as indicate at the bottom.

**(C)** Gene set enrichment analysis (GSEA) comparing the Tu-Gr1<sup>+</sup>CD11b<sup>+</sup> and Spl-Gr1<sup>+</sup>CD11b<sup>+</sup> primed 4T1 cells. GSEA shows positive correlations of both Sca1 Positive and Sca1 Negative signatures. NES, normalized enrichment score.

**(D)** Venn diagrams showing that 56 upregulated genes, and 1 downregulated gene are shared between endogenous and Tu-Gr1<sup>+</sup>CD11b<sup>+</sup> induced Sca-1<sup>+</sup> population in 4T1 tumor cells.

**(E)** UMAP plot showing clusters of cancer cells and myeloid cell populations in orthotopically growing 4T1-derived primary tumors extracted from the Sebastian dataset (see Materials and Methods for details).

**(F)** Circos diagram showing the potential interactions between cancer cells and different myeloid cell populations determined by CellPhoneDB (see Materials and Methods for details) based on the Sebastian dataset. Only OSMR and P2RY6 are shared with the common 56 gene list showed in panel **D**.

**(G)** UMAP plot showing the gene expression pattern of *Osm*, *Osmr*, *Il6st*, *Il6* and *Il6ra* in different cell populations in the Sebastian dataset.

**(H-I)** mRNA expression of *Osm*, *Osmr*, *Il6st*, *Il6* and *Il6ra* based on RNAseq data used to generate the heatmaps shown in **A & B**, respectively. *Osm* expression is not detected in sorted 4T1 cells.

Data are presented as mean of normalized count  $\pm$  SD. P values: \*,  $p < 0.05$ ; \*\*,  $p < 0.01$ ; \*\*\*,  $p < 0.001$ ; \*\*\*\*,  $p < 0.0001$ ; ns, non-significant (unpaired two-tailed student's t test for **H**, and unpaired two-tailed student's t test with Holm correction for **I**).

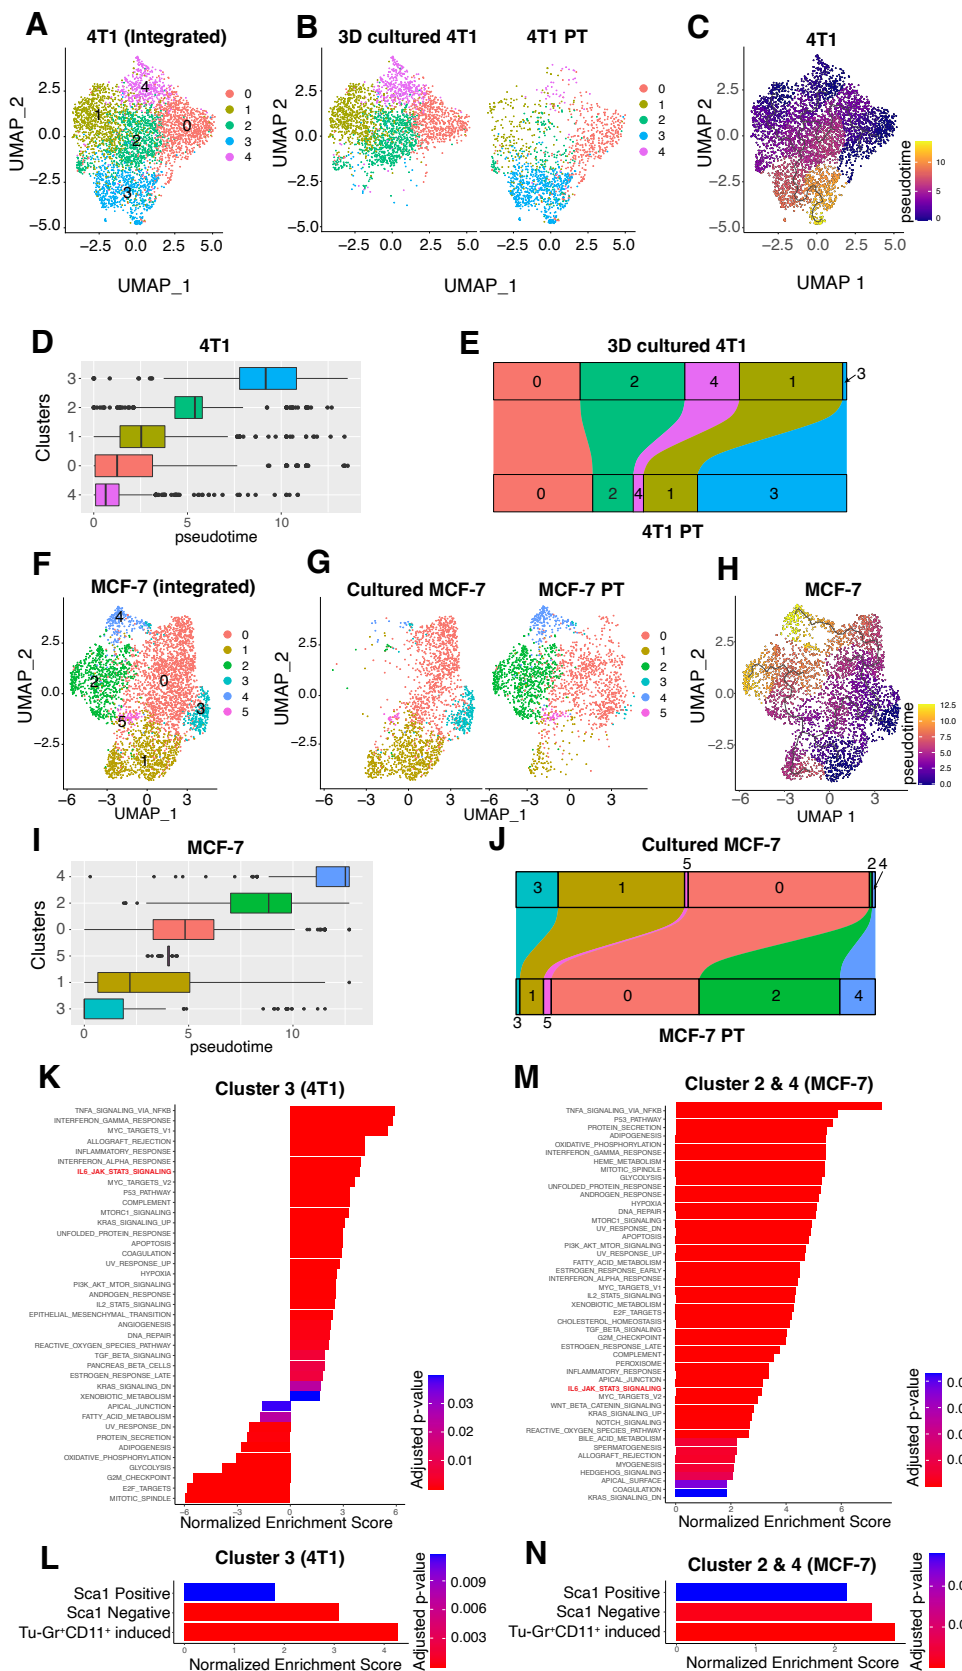

**Figure 4. Transformation dynamics of tumor cell populations induced by the tumor microenvironment**

**(A)** UMAP plots showing 4T1 clusters based on integrated scRNA-seq data from 4T1 cells in 3D culture or in primary tumor.

**(B)** Distribution of specific clusters in 4T1 cells in 3D culture or in primary tumor (PT).

**(C-D)** UMAP plot **(C)** and boxplot **(D)** showing the clusters in pseudo-time during the transformation of 4T1 cells from *ex vivo* culture to *in vivo*.

**(E)** Sankey diagram showing the dynamic of each cluster during the transformation of 4T1 cells from *ex vivo* culture to *in vivo*. Cluster 3 was largely expanded *in vivo*.

**(F)** UMAP plots showing MCF-7 clusters based on integrated scRNA-seq data from MCF-7 cells in culture or in primary tumor.

**(G)** Distribution of the specific clusters in cultured MCF7 cells or in MCF7 primary tumors (PT).

**(H-I)** UMAP plot **(H)** and boxplot **(I)** showing the clusters in pseudo-time during the transformation of MCF-7 cells from *ex vivo* culture to *in vivo*.

**(J)** Sankey diagram showing the dynamic of each cluster during the transformation of MCF-7 cells from *ex vivo* culture to *in vivo*. Cluster 2 and 4 were largely expanded *in vivo*.

**(K-L)** GESA analysis of Hallmark gene sets **(K)** and Sca1 Positive signature, Sca1 Negative Signature and Tu-Gr1<sup>+</sup>CD11b<sup>+</sup> induced signature **(L)** of cluster 3 in 4T1 data. Only the signatures with adjusted p-value <0.05 were shown.

**(M-N)** GESA analysis of Hallmark gene sets **(M)** and Sca1 Positive signature, Sca1 Negative Signature and Tu-Gr1<sup>+</sup>CD11b<sup>+</sup> induced signature **(N)** of cells in cluster 2 or cluster 4 in MCF-7 data. Only the signatures with adjusted p-value <0.05 were shown.

Analyses are based on publicly available data (4T1: GSM4812003 and GSM3502134; MCF-7: GSM4681765 and GSM5904917).



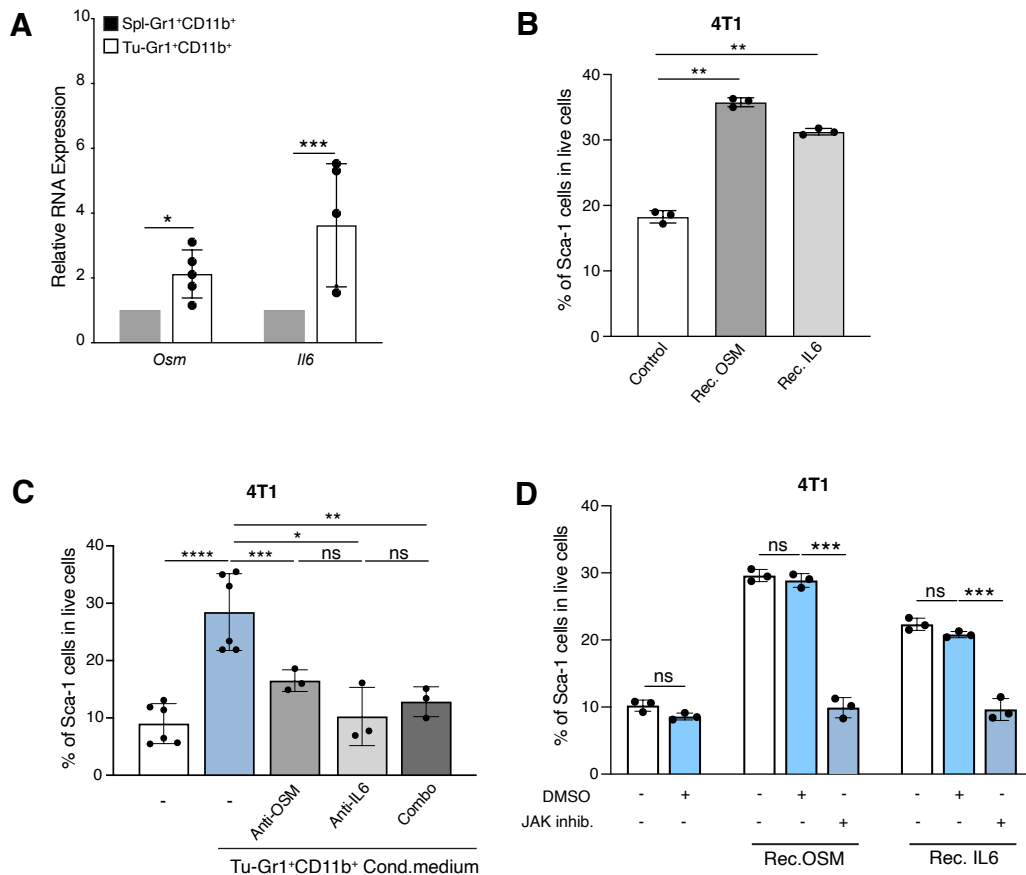

**Figure 5. Sca-1<sup>+</sup> population is modulated by the OSM/IL6-JAK pathway**

**(A)** Quantitative PCR analysis of *Osm* and *Il6* mRNA expression in Tu-Gr1<sup>+</sup>CD11b<sup>+</sup> and Spl-Gr1<sup>+</sup>CD11b<sup>+</sup>. Tu-Gr1<sup>+</sup>CD11b<sup>+</sup> express significantly higher *Osm* and *Il6* levels compared with Spl-Gr1<sup>+</sup>CD11b<sup>+</sup>. n = 4-5/group.

**(B)** Fraction of 4T1-Sca1<sup>+</sup> cells upon exposure to recombinant Il6 or Osm protein (1 µg/ml for 48 hours) as determined by flow cytometry. Both cytokines induced the Sca-1<sup>+</sup> population in cultured 4T1 tumor cells. n = 3/group.

**(C)** Inhibition of OSM and IL6 from Tu-Gr1<sup>+</sup>CD11b<sup>+</sup> conditioned medium with anti-OSM or anti-IL6 neutralizing antibody as indicated. Treatment with either antibody significantly suppressed the Sca-1<sup>+</sup> population enrichment. n = 3-6/group.

**(D)** Treatment with the JAK inhibitor Ruxolitinib (5 µM) of cultured 4T1 cells stimulated with recombinant IL6 or OSM protein (1 µg/ml, 48 hours exposure) as indicated. Ruxolitinib inhibited Sca-1<sup>+</sup> population enrichment induced by recombinant IL6 or OSM protein. n = 3/group. Data are represented as mean ± SEM from 3 independent experiments. \*, p<0.05; \*\*, p< 0.01; \*\*\*, p< 0.001; \*\*\*\*, p< 0.0001; ns, non-significant (unpaired two-tailed student's t test for **A**, and one-way ANOVA with Dunnett's multiple-comparison test for **B** and **D**, and one-way ANOVA with Tukey multiple-comparison test for **C**).

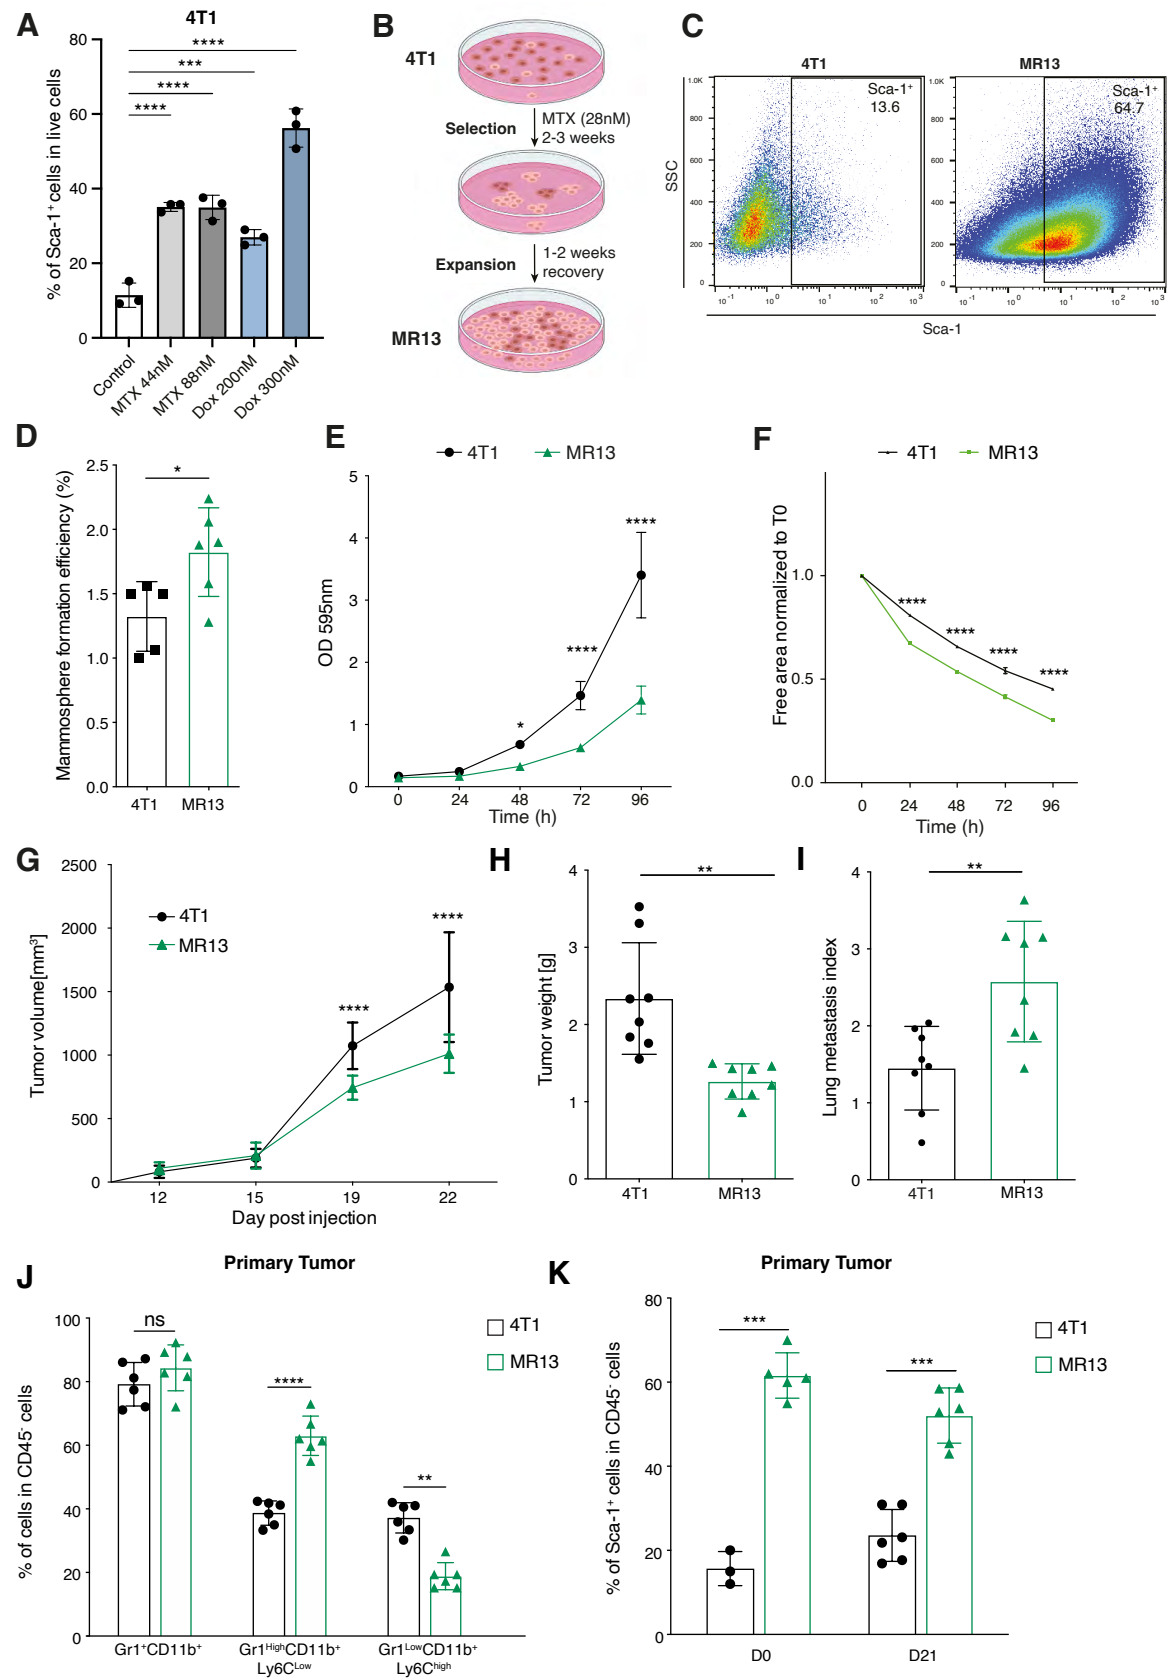

**Figure 6. Long term chemotherapy treatment of 4T1 cells induces a stable Sca-1<sup>+</sup> population (MR13) with higher metastatic capacity and CSC features**

**Figure 6. Long term chemotherapy treatment of 4T1 cells induces a stable Sca-1<sup>+</sup> population (MR13) with higher metastatic capacity and CSC features**

**(A)** Fraction of 4T1-Sca1<sup>+</sup> cells upon short-term (48 hours) Methotrexate (44 and 88 nM) and Doxorubicin (200 and 300 nM) treatments. All treatments induced enrichment of Sca-1<sup>+</sup> population. n = 3/group.

**(B)** Illustrative scheme of the experimental design to obtain chemotherapy resistant MR13 cells from 4T1.

**(C)** Dot plots representing Sca-1 expression vs SSC determined by flow cytometry in MR13 chemotherapy resistant cells vs parental 4T1 tumor cells in vitro.

**(D)** Quantification of the mammosphere forming efficiency of 4T1 and MR13 tumor cells. n = 5-6/group.

**(E)** Cell proliferation curve of 4T1 and MR13 tumor cells in vitro determined by crystal violet assay. The results are presented as mean of optical density (OD). n = 8/group.

**(F)** Cell motility of 4T1 and MR13 tumor cells determined by a scratch wound healing assay. n=5-6/group. Results are presented as cell-free area relative to the initial wound area from 3 independent experiments.

**(G)** Growth curves of primary tumors in BALB/c mice orthotopically injected with 4T1 and MR13 tumor cells (n=10-11/group).

**(H)** Tumor weight of 4T1 and MR13 tumors recovered from BALB/c mice at day 22 post injection (n=8-9/group).

**(I)** Lung metastasis index 23 days post injection. The number of metastatic nodules is determined by H&E staining and normalized based on the primary tumor weight (n=8-9/group).

**(J)** Frequency of different CD11b<sup>+</sup> myeloid cells subpopulations in primary tumors from MR13 and 4T1 injected mice determined by flow cytometry 21-days post injection (n= 6). Subpopulations are determined in CD45 positive, viable cell population.

**(K)** Percentage of Sca-1<sup>+</sup> tumor cells at time of injections (D0) of 4T1 and MR13 cells and in primary tumors recovered at day 21 (D21). Sca-1 expression is determined in CD45 negative, viable cell population. n = 3-6/group.

Data are represented as mean ± SEM from at least 3 independent experiments. \*, p<0.05; \*\*, p< 0.01; \*\*\*, p< 0.001; \*\*\*\*, p< 0.0001; ns, non-significant (one-way ANOVA with Dunnett's multiple-comparison test for **A**, unpaired two-tailed student's t test for **D**, **H-K**, and two-way ANOVA with Tukey's multiple comparison test for **E-G**).

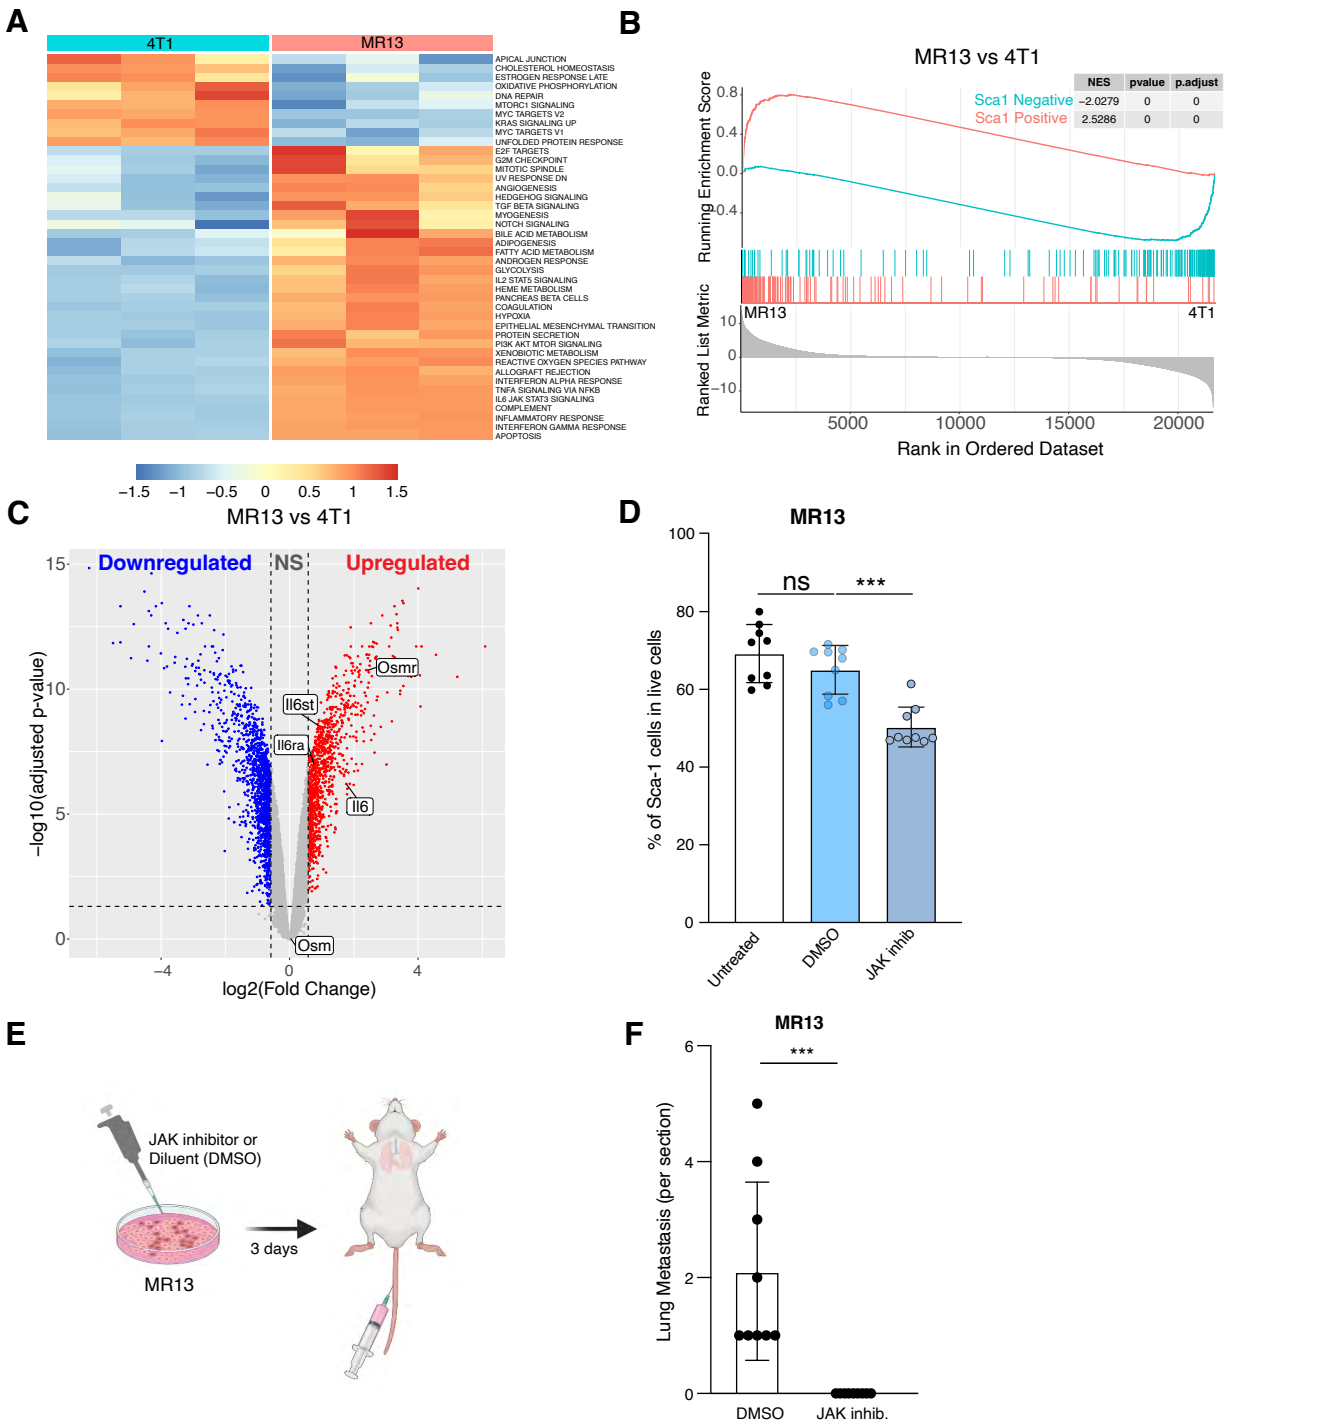

**Figure 7. IL6-JAK pathway promotes Sca-1<sup>+</sup> persistence and metastatic capacity in chemotherapy resistant MR13 tumor cells**  
**(A-B)** Gene expression analysis of parental 4T1 and chemotherapy resistant MR13 cells. Heat map represents the signature score of the hallmark pathways analysis. Results from 3 biological replicates are shown **(A)**. GSEA results showing that MR13 cells are positively enriched with for the Sca1 Positive signature and negatively with for the Sca1 Negative signature **(B)**.  
**(C)** Volcano plot showing the differential expression of *Osm*, *Osmr*, *Il6st*, *Il6* and *Il6ra* mRNA in MR13 vs 4T1 tumor cells.  
**(D)** Fraction of Sca-1<sup>+</sup> population in MR13 tumor cells treated for 48 hours with Ruxolitinib (5  $\mu$ M) relative to vehicle control (DMSO) treatment.  
**(E)** Illustrative scheme of the experimental design for testing the effect of Ruxolitinib on MR13 metastatic capacity shown in F. MR13 tumor cells were treated with Ruxolitinib or DMSO in vitro for 72 hours and then injected into the mice tail vein. Lungs were examined for metastasis 10 days after tumor cell injection.  
**(F)** Number of metastatic nodules in the lungs from mice injected with MR13 treated in vitro with Ruxolitinib or DMSO and indicated (n=9/group).  
 Data are represented as mean values  $\pm$  SEM from 3 independent experiments. P values: ns, non-significant, \*\*\*< 0.001 (one-way ANOVA with Dunnett's multiple-comparison test for **D**, and unpaired two-tailed student's t test for **F**).

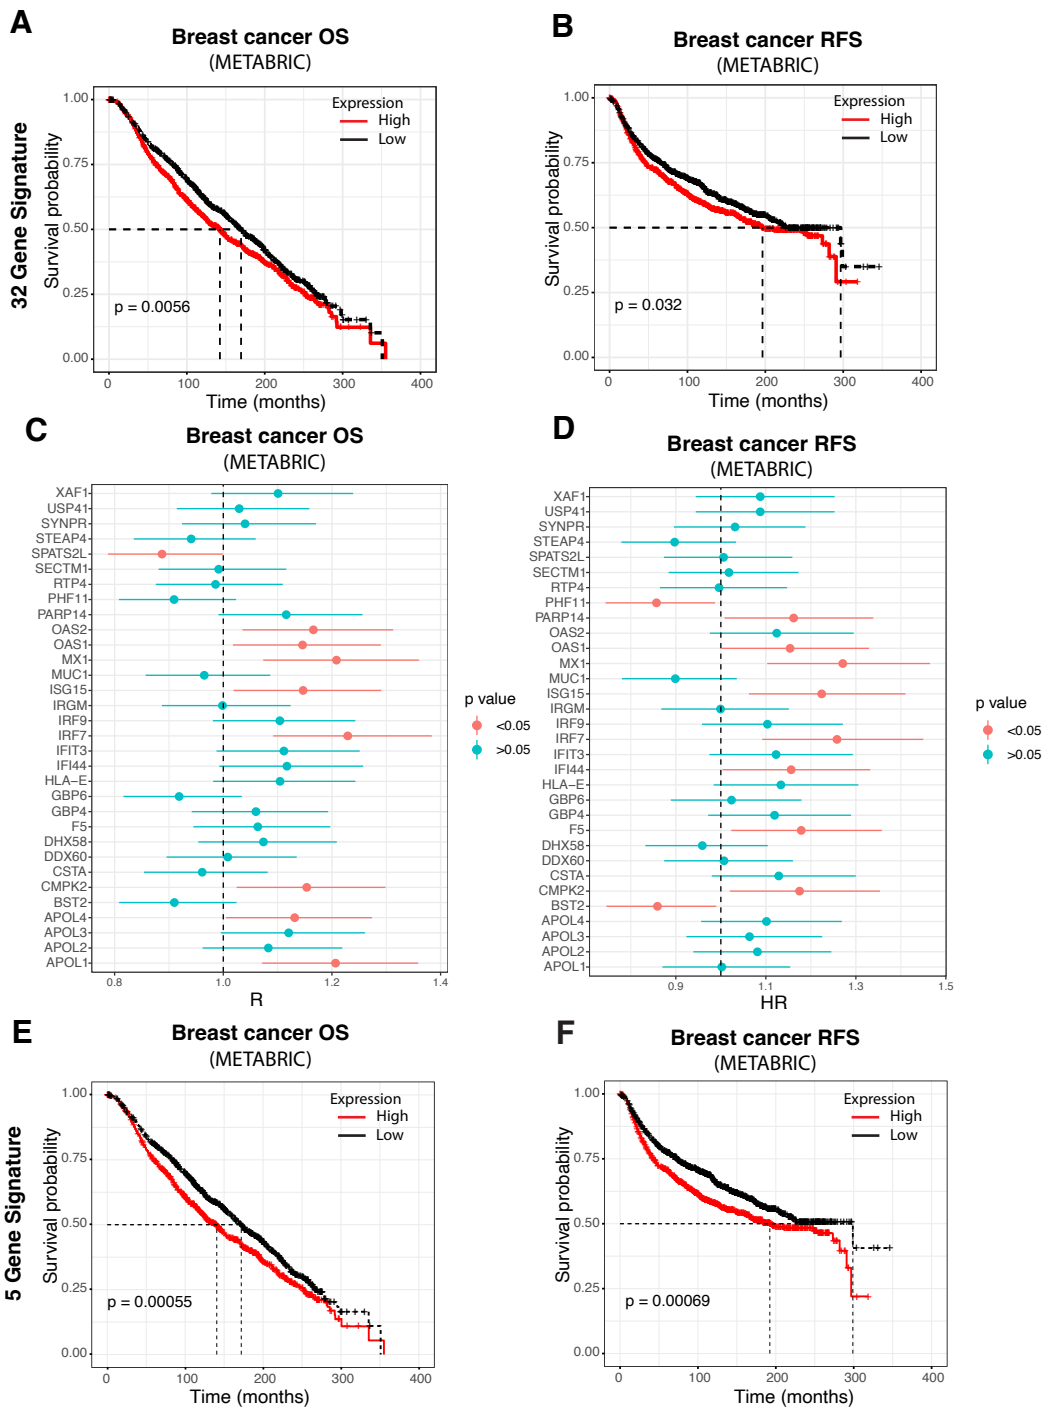

**Figure 8. Tu-Gr1<sup>+</sup>CD11b<sup>+</sup>-induced tumor cell signature predicts worse outcome in breast cancer patients**  
**(A-B)** Kaplan-Meier curves showing overall survival (OS) **(A)** or relapse-free survival (RFS) **(B)** for breast cancer patients according to high or low expression of an orthologue 32 gene signature, based on the Tu-Gr1<sup>+</sup>CD11b<sup>+</sup>-induced 4T1 cell signature, in the METABRIC datasets.  
**(C-D)** Forest plots showing the Cox proportional hazard regression (HR) for OS **(C)** and RFS **(D)** of the individual 32 orthologues of the Tu-Gr1<sup>+</sup>CD11b<sup>+</sup>-induced signature, based on gene expression in tumor samples from METABRIC dataset.  
**(E-F)** Kaplan-Meier curves showing OS **(E)** and RFS **(F)** according to the reduced 5 orthologue gene signature expression in the METABRIC datasets.  
The p value for **A, B, E, F** was calculated using the log-rank test and high and low expression levels were stratified by median values.

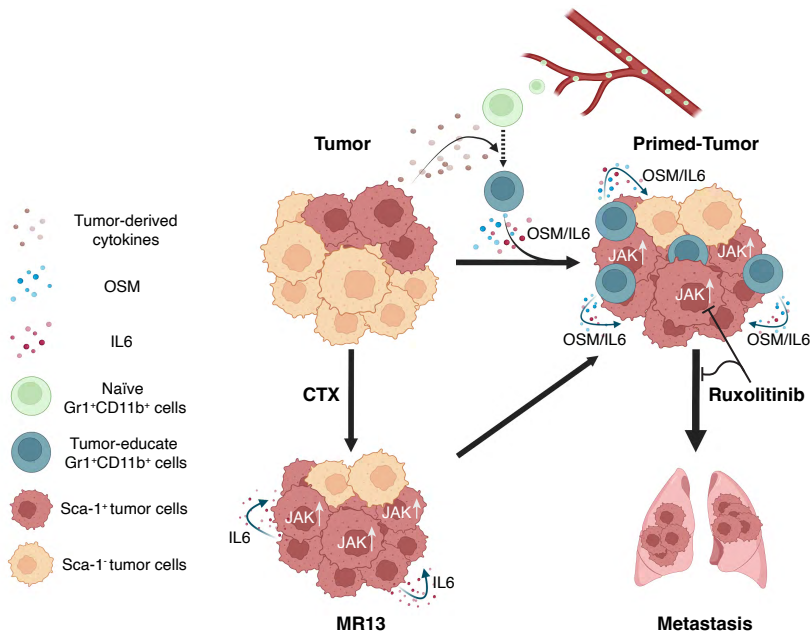

**Figure 9 Illustrative scheme of the proposed model for cancer cell plasticity modulated by OSM/IL6 during tumor progression and chemotherapy**

Parental tumor cells maintain a small portion of highly metastatic Sca-1<sup>+</sup> population. During tumor progression, naïve Gr1<sup>+</sup>CD11b<sup>+</sup> are recruited to the TME and educated into Tu-Gr1<sup>+</sup>CD11b<sup>+</sup> by tumor-derived factors. In turn, Tu-Gr1<sup>+</sup>CD11b<sup>+</sup> secrete OSM and IL6 to convert Sca-1<sup>+</sup> population into a highly metastatic Sca-1<sup>+</sup> population. Chemotherapy (CTX) enriched for Sca-1<sup>+</sup> population due to its intrinsic resistance against cytotoxic treatment. Resistant cells express IL6 to maintain the high portion of Sca-1<sup>+</sup> population with high metastatic ability. JAK inhibitor Ruxolitinib suppresses the conversion to Sca-1<sup>+</sup> population and metastasis. Inhibition of OSM, IL6 and the activated downstream kinase JAK are candidate therapeutic targets to impinge on metastatic breast cancer progression during natural evolution and following therapy-resistance.
