1 **Tumor-educated Gr1<sup>+</sup>CD11b<sup>+</sup> cells instigate breast cancer metastasis by twisting**  
2 **cancer cells plasticity via OSM/IL6–JAK signaling**

3  
4 Sanam Peyvandi<sup>1, +, \*</sup>, Manon Bulliard<sup>1, +</sup>, Annamaria Kauzlaric<sup>2</sup>, Oriana Coquoz<sup>1</sup>, Yu-Ting  
5 Huang<sup>1</sup>, Nathalie Duffey<sup>1, +</sup>, Laetitia Gafner<sup>1</sup>, Gireca Lorusso<sup>1</sup>, Nadine Fournier<sup>2</sup>, Qiang  
6 Lan<sup>1,3,\*,#</sup>, and Curzio Rüegg<sup>1,\*,#</sup>

7  
8 <sup>1</sup> Pathology Unit, Department of Oncology, Microbiology and Immunology (OMI), Faculty  
9 of Science and Medicine, University of Fribourg, 1700 Fribourg, Switzerland;

10 <sup>2</sup> Translational Data Science Group, Swiss Institute of Bioinformatics, Lausanne,  
11 Switzerland;

12 <sup>3</sup> Cell and Tissue Dynamics Research Program, Institute of Biotechnology, Helsinki  
13 Institute of Life Science (HiLIFE), University of Helsinki, Helsinki, Finland.

14

15 \* These authors contributed equally as corresponding authors.

16

17

18 + Current affiliations: S.P., Immunobiology Department, University of Lausanne (UNIL),  
19 Switzerland; M.B., Swiss Institute for Experimental Cancer Research (ISREC), Ecole  
20 Polytechnique Fédérale Lausanne (EPFL) UPCDA SV 2833 (Bâtiment SV) Lausanne,  
21 Switzerland; N.D., Department of Oncology, Centre Hospitalier Universitaire Vaudois  
22 (CHUV), University of Lausanne (UNIL), Switzerland; Y-T.H., Daiichi Sankyo Co., Ltd.  
23 Taipei City, Taiwan

24

25 # Lead contacts and co-senior authors:

26 # C.R. ([curzio.ruegg@unifr.ch](mailto:curzio.ruegg@unifr.ch); +4126 300 8766), Department of Oncology, Microbiology,  
27 Immunology, Faculty of Science and Medicine, University of Fribourg, Chemin du Musée  
28 18, Per 17, CH-1700 Fribourg, Switzerland

29 # Q.L. ([qiang.lan@helsinki.fi](mailto:qiang.lan@helsinki.fi)) Cell and Tissue Dynamics Research Program, Institute of  
30 Biotechnology, Helsinki Institute of Life Science (HiLIFE), Biocenter 2, P.O. Box 56,  
31 FIN-00014, University of Helsinki, Helsinki, Finland

32

33 **Running title:** OMS/IL6 twist breast cancer plasticity to promote metastasis

34

35 **Keywords:** Breast cancer metastasis, chemotherapy, cancer stem cells, GR1, Oncostatin  
36 M, IL6, JAK, plasticity, heterogeneity

37

38 **Abstract**

39 Cancer cell plasticity contributes to tumor therapy resistance and metastasis formation,  
40 which represent the main causes of cancer-related death for most cancers, including  
41 breast cancer. The tumor microenvironment drives cancer cell plasticity and metastasis  
42 and unravelling the underlying cues may provide novel effective strategies to manage  
43 metastatic disease. Here we show that stem cell antigen-1 positive (Sca-1<sup>+</sup>) murine breast  
44 cancer cells enriched during tumor progression and metastasis have higher *in vitro* cancer  
45 stem cell-like properties, enhanced *in vivo* metastatic ability, and initiate primary tumors  
46 rich in Gr1<sup>high</sup>CD11b<sup>+</sup>Ly6C<sup>low</sup> cells. In turn, tumor-educated Gr1<sup>+</sup>CD11b<sup>+</sup> (Tu-Gr1<sup>+</sup>CD11b<sup>+</sup>)  
47 cells rapidly and transiently convert low metastatic 4T1-Sca-1<sup>-</sup> cells into highly metastatic  
48 4T1-Sca-1<sup>+</sup> cells via secreted OSM and IL6. Moreover, chemotherapy-resistant and highly  
49 metastatic 4T1-derived cells maintain high Sca-1<sup>+</sup> frequency through cell autonomous IL6  
50 production. Inhibition of OSM, IL6 or JAK suppressed Tu-Gr1<sup>+</sup>CD11b<sup>+</sup>-induced Sca-1<sup>+</sup>  
51 population enrichment *in vitro*, while JAK inhibition abrogated metastasis of chemotherapy-  
52 enriched Sca-1<sup>+</sup> cells *in vivo*. Importantly, Tu-Gr1<sup>+</sup>CD11b<sup>+</sup> cells invoked a gene signature  
53 in tumor cells predicting shorter OS and RFS in breast cancer patients. Collectively, our  
54 data identified OSM/IL6-JAK as a clinically relevant paracrine/autocrine axis instigating  
55 breast cancer cell plasticity triggering metastasis.

56

## 57 Introduction

58 Metastasis accounts for over 90% of cancer-related death, calling for new strategies  
59 to prevent cancer cell dissemination and metastasis formation <sup>1</sup>. Recent studies using  
60 single-cell lineage tracing and single-cell RNA sequencing (scRNA-seq) technologies have  
61 provided detailed information about intratumor heterogeneity <sup>2,3</sup>, whereby genetically,  
62 epigenetically and functionally diverse subpopulations of cancer cells exist within the tumor  
63 mass, spatially and temporally <sup>4</sup>. Intratumor heterogeneity may arise by modulating cancer  
64 cell plasticity, especially of cancer stem cells (CSCs), through cell-intrinsic and -extrinsic  
65 mechanisms <sup>5,6</sup>.

66 Multiple CSC subpopulations appear to co-exist within the primary tumor mass  
67 resulting in high degree of tumor cell heterogeneity and increased aggressiveness <sup>7</sup>  
68 including in breast cancer <sup>4,8–11</sup>. In particular, CSCs can acquire metastasis initiating  
69 capacities <sup>12</sup> and resistance to therapy, resulting in cancer relapse <sup>4</sup>. Moreover, non-CSCs  
70 within the tumor bulk may acquire CSC properties to repopulate the tumor<sup>4</sup>. While CSC are  
71 defined rather functionally by their ability to initiate tumors and metastasis in low number  
72 *in vivo*, several cell surface markers associated with CSC features have been reported,  
73 including CD44, CD24, Sca-1, CD61, CD49f were used to identify breast CSCs <sup>13,14</sup>.

74 The interaction of tumor cells with the tumor microenvironment (TME) contributes to  
75 tumor cell plasticity and tumor heterogeneity <sup>15,16</sup>. Cells of the TME also promote tumor  
76 escape and metastasis through multiple mechanisms, including promotion of  
77 angiogenesis, cell survival, invasion, epithelial-mesenchymal transition (EMT), and  
78 immunosuppression <sup>17–22</sup>. Recently, they have been reported to instigate expansion of  
79 CSC with metastatic ability (also known as metastasis-initiating cells) in different cancers  
80 <sup>17,23,24</sup>. Thus, the TME dynamics is a key driver of cancer cell plasticity and heterogeneity  
81 promoting tumor growth, progression and metastasis <sup>4</sup>. Accurate characterization of the

82 regulation of tumor plasticity and heterogeneity by the TME may reveal novel opportunities  
83 for developing effective anti-metastatic therapies <sup>8,14</sup>.

84 TME-derived Oncostatin M (OSM) has been shown to mediate tumor progression  
85 and CSC stemness by activating its receptor OSMR <sup>25</sup>. OSM belongs to the IL6 family of  
86 cytokines (including IL6 itself, IL11 and LIF) <sup>26,27</sup>, whose members bind to dimeric receptors  
87 sharing a common subunit (gp130 or IL6ST) and activate JAK-STAT, RAS-MAPK and  
88 PI3K-AKT pathways <sup>28,29</sup>. Increased OSM or IL6 expression correlates with reduced  
89 survival in breast cancer patients <sup>30,31</sup>. OSM was shown to drive breast cancer progression  
90 and metastasis through direct effects on cancer cells, such as suppression of estrogen  
91 receptor (ER) expression <sup>31</sup> and promotion of EMT <sup>25,32</sup>, and indirect effects via TME cells,  
92 in particular the reprogramming of tumor associated macrophages and fibroblasts <sup>33–36</sup>.

93 Here, by assessing the metastatic evolution of murine triple-negative breast cancer  
94 (TNBC) models *in silico* and *in vivo*, we observed that the Sca-1<sup>+</sup> tumor cell subpopulation  
95 is enriched during tumor progression. We show that tumor-educated Gr1<sup>+</sup>CD11b<sup>+</sup> cells  
96 (Tu-Gr1<sup>+</sup>CD11b<sup>+</sup>), but not naïve Gr1<sup>+</sup>CD11b<sup>+</sup> cells from spleen (Spl-Gr1<sup>+</sup>CD11b<sup>+</sup>) or bone  
97 marrow (BM-Gr1<sup>+</sup>CD11b<sup>+</sup>) in tumor-bearing mice, modulate tumor plasticity via OSM/IL6-  
98 JAK signaling by rapidly and transiently converting 4T1-Sca-1<sup>-</sup> cells into 4T1-Sca-1<sup>+</sup> cells  
99 with high metastatic capacity. Prolonged exposure of 4T1 cells to chemotherapy stably  
100 enriched for metastatic Sca-1<sup>+</sup> cells via an autocrine IL6-JAK signaling loop. A short *in vitro*  
101 treatment of these chemo-resistant cells with the JAK inhibitor Ruxolitinib, suppressed their  
102 metastatic capacity. Importantly, Tu-Gr1<sup>+</sup>CD11b<sup>+</sup> invoked a gene expression signature in  
103 4T1 cells that predicted shorter overall survival (OS) and relapse-free survival (RFS) in  
104 breast cancer patients, reinforcing the clinical relevance of these findings.

105 Our results reveal a novel mechanism modulating tumor plasticity and triggering the  
106 emergence of cancer cells with enhanced metastatic capacity, through paracrine (Tu-

107 Gr1<sup>+</sup>CD11b<sup>+</sup>-mediated) and cell autonomous (chemotherapy-induced) OSM/IL6-JAK  
108 dependent signaling. The OSM/IL6-JAK axis may be considered as a candidate of  
109 actionable clinical targets to impinge on metastatic progression and therapy resistance.

110

## 111 **Results**

### 112 **The Sca-1<sup>+</sup> population is enriched during tumor progression and has higher *in vivo*** 113 **metastatic capacity**

114 To investigate tumor cell heterogeneity during tumor progression, we first examined  
115 the expression of the previously reported breast CSC markers CD24, CD44, CD61, Sca-1  
116 and CD49f<sup>13</sup> in the publicly available RNA sequencing (RNAseq) dataset from Ross *et al.*  
117 encompassing several murine breast cancer models<sup>37</sup>. This dataset includes data from  
118 cultured cancer cells (In\_Culture), orthotopic primary tumors (OT\_PT), spontaneous lung  
119 metastases (OT\_LuM), and experimental lung metastases after tail vein injection  
120 (TV\_LuM) (Fig. 1a and Supplementary Fig. 1a). *Sca-1* expression was elevated in lung  
121 metastasis in 4T1, 6DT1, Mvt1 and Met1 models compared with the respective primary  
122 tumors. Interestingly, in 4T1, 6DT1 and Mvt1 models, *Sca-1* expression was also elevated  
123 in experimental lung metastases compared with cultured cells. However, the expression of  
124 *Cd24*, *Cd44*, *Cd61* and *Cd49f* were not altered, or their expression pattern was inconsistent  
125 during progression (Supplementary Fig. 1a). Thus, increased *Sca-1* expression during  
126 metastasis is consistently observed in different preclinical breast cancer models.

127 To investigate whether the increased *Sca-1* expression within the tumor mass was  
128 due to an increased gene expression in all cancer cells or to the enrichment of a Sca-1<sup>+</sup>  
129 population, we orthotopically injected 4T1 tumor cells and determined the frequency of  
130 different cell populations present in the primary tumor and lung metastases 30 days later  
131 by flow cytometry (Fig. 1b). We observed that the frequency of both Sca-1<sup>+</sup> and CD61<sup>+</sup>

132 populations increased in lung metastases compared to primary tumors (Fig. 1c). In  
133 contrast, the CD24<sup>+</sup>, CD44<sup>+</sup> and CD49f<sup>+</sup> populations were not significantly altered.

134 The enrichment of the Sca-1<sup>+</sup> population in lung metastases prompted us to ask  
135 whether Sca-1<sup>+</sup> cells actively contribute to the metastasis. To this end, we isolated 4T1-  
136 Sca-1<sup>+</sup> and 4T1-Sca-1<sup>-</sup> cells by magnetic activated cell sorting (MACS) from parental 4T1  
137 cells, which contains low frequency of Sca-1<sup>+</sup> population (10-15%) (Supplementary Fig.  
138 1b, c), and examined their metastatic ability *in vivo*. In the orthotopic injection model, 4T1-  
139 Sca-1<sup>+</sup> cells formed significantly more lung metastases than 4T1-Sca-1<sup>-</sup> cells, while there  
140 was no significant difference in primary tumor growth (Fig. 1d-f). Upon tail vein injection,  
141 4T1-Sca-1<sup>+</sup> cells displayed significantly greater lung colonization ability compared to 4T1-  
142 Sca-1<sup>-</sup> cells and a non-significant increase compared to parental 4T1 cells (Fig. 1g-i). In  
143 addition, 4T1-Sca-1<sup>+</sup> cells showed significantly higher *in vitro* mammosphere forming  
144 efficiency than 4T1-Sca-1<sup>-</sup> cells (Supplementary Fig. 2a), while *in vitro* cell growth,  
145 anchorage-independent survival, and cell motility were comparable (Supplementary Fig.  
146 2b-d).

147 These results suggest that 4T1-Sca-1<sup>+</sup> and 4T1-Sca-1<sup>-</sup> cells have similar tumorigenic  
148 potential, while 4T1-Sca-1<sup>+</sup> cells have higher metastasis-initiating capacity.

149

## 150 **The Sca-1<sup>+</sup> population is plastic *in vitro* and *in vivo***

151 Growing evidence indicates that cancer cells possess plastic features, which can be  
152 modulated by both cell-intrinsic factors and microenvironmental cues<sup>37,38</sup>. To characterize  
153 the observed plasticity of 4T1-Sca-1<sup>+</sup> cells, we first investigated isolated 4T1-Sca-1<sup>+</sup> and  
154 4T1-Sca-1<sup>-</sup> cells *in vitro*. The abundance of Sca-1<sup>+</sup> population in 4T1-Sca-1<sup>+</sup> cells enriched  
155 by MACS sorting (> 75%) gradually decreased to 50% after 4 days of culture  
156 (Supplementary Fig. 2e, upper panel), while the Sca-1<sup>-</sup> cells (negatively enriched by

157 MACS) regenerated a Sca-1<sup>+</sup> population (from less than 1% to 19%) (Supplementary Fig.  
158 2e, lower panel). Consistently, after orthotopic injection of 4T1-Sca-1<sup>+</sup> cells, the abundance  
159 of the Sca-1<sup>+</sup> population in the derived tumors decreased from 75% to about 40% after 23  
160 days of growth, while in tumors generated from 4T1-Sca-1<sup>-</sup> cells it increased from less than  
161 1% to 15% (Supplementary Fig. 2f), similar to the frequency of Sca-1<sup>+</sup> population in tumors  
162 derived from parental 4T1 cells (Fig. 1c). In addition, when tumor cells derived from primary  
163 tumors and lung metastases of parental 4T1-injected mice were cultured *ex vivo*, the  
164 abundance of the Sca-1<sup>+</sup> population significantly decreased from 20% to 4.5% and 60% to  
165 19%, respectively (Supplementary Fig. 2g).

166 From these observations we conclude that both Sca-1<sup>+</sup> and Sca-1<sup>-</sup> populations are  
167 highly plastic and this plasticity appears to be modulated *in vivo*.

168

### 169 **Tumor-educated Gr1<sup>+</sup>CD11b<sup>+</sup> cells expand the metastatic Sca-1<sup>+</sup> population**

170 Immune cells in the TME are critical determinants of tumor cells functions and  
171 behaviors, including metastatic capacity<sup>39</sup>. To collect evidence for a potential correlation  
172 between immune cells and the Sca-1<sup>+</sup> population, we characterized the inflammatory cells  
173 infiltrating the orthotopic primary tumors. We observed a significant increase of the  
174 Gr1<sup>high</sup>CD11b<sup>+</sup>Ly6C<sup>low</sup> population and a significant decrease of the Gr1<sup>low</sup>CD11b<sup>+</sup>Ly6C<sup>high</sup>  
175 population in tumors derived from the 4T1-Sca-1<sup>+</sup> cells, compared to tumors derived from  
176 the 4T1-Sca-1<sup>-</sup> cells (Fig. 2a). Gr1<sup>high</sup>CD11b<sup>+</sup>Ly6C<sup>low</sup> cells are immature myeloid  
177 progenitors mobilized from the bone marrow by tumor-derived signals capable of  
178 establishing an immunosuppressive environment facilitating tumor progression and  
179 metastasis<sup>40,41</sup>. Gr1<sup>+</sup>CD11b<sup>+</sup> cells form a homogenous population in the circulation  
180 (Supplementary Fig. 3a), consistent with the literature<sup>42</sup>, while in the TME they  
181 differentiated into two distinct subpopulations, Gr1<sup>high</sup> and Gr1<sup>low</sup>. To examine the direct



182 contribution of the tumor-educated Gr1<sup>+</sup>CD11b<sup>+</sup> cells in promoting the enrichment of the  
183 Sca-1<sup>+</sup> population, we isolated Gr1<sup>+</sup> cells from primary tumors, bone marrow and spleen of  
184 4T1 tumor-bearing BALB/c mice by MACS, and co-cultured them *in vitro* with parental 4T1  
185 cells (Fig. 2b). Gr1<sup>+</sup> cells isolated from tumors (Tu-Gr1<sup>+</sup>CD11b<sup>+</sup>), but not from spleen (Spl-  
186 Gr1<sup>+</sup>CD11b<sup>+</sup>) or bone marrow (BM-Gr1<sup>+</sup>CD11b<sup>+</sup>), significantly induced the expansion of a  
187 Sca-1<sup>+</sup> population in 4T1 cells (from 12.5% to 81%, p<0.001) in 48 hours (Fig. 2c). To test  
188 whether the expansion of a Sca-1<sup>+</sup> population from 4T1 cells required direct contact with  
189 Tu-Gr1<sup>+</sup>CD11b<sup>+</sup> or was mediated by soluble factors, we compared the induction in two  
190 different co-culture setups, either in standard wells (cell contact) or in Transwells, where  
191 Tu-Gr1<sup>+</sup>CD11b<sup>+</sup> and 4T1 cells were separated by a filter with 0.4 μm pores (Fig. 2d). We  
192 did not observe any significant difference in the induction efficiency of Sca-1<sup>+</sup> populations  
193 (measured by flow cytometry) between the two conditions and increasing the 4T1:Tu-  
194 Gr1<sup>+</sup>CD11b<sup>+</sup> cell ratio from 1:1 to 1:3 did not further expand the Sca-1<sup>+</sup> population (Fig.  
195 2e). Furthermore, conditioned medium from co-cultured Tu-Gr1<sup>+</sup>CD11b<sup>+</sup> and 4T1 cells was  
196 also capable of subsequently expanding the Sca-1<sup>+</sup> population from 4T1 cells alone  
197 (Supplementary Fig. 3b). Interestingly, the Tu-Gr1<sup>+</sup>CD11b<sup>+</sup> induced Sca-1<sup>+</sup> population  
198 appeared more stable in time compared to the isolated 4T1-Sca-1<sup>+</sup> cells (Supplementary  
199 Fig. 3c and Supplementary Fig. 2e). More importantly, when Gr1<sup>+</sup>CD11b<sup>+</sup> cells-primed 4T1  
200 cells were injected into the tail vein, Tu-Gr1<sup>+</sup>CD11b<sup>+</sup> primed ones showed higher lung  
201 colonization capacity compared to Spl-Gr1<sup>+</sup>CD11b<sup>+</sup> primed one (Fig. 2f-h).

202 These results imply that tumor-educated Gr1<sup>+</sup>CD11b<sup>+</sup> cells induce the emergence of  
203 a highly metastatic Sca-1<sup>+</sup> population through secreted factors.

204  
205 **Tu-Gr1<sup>+</sup>CD11b<sup>+</sup>-induced and tumor-inherent Sca-1<sup>+</sup> populations display distinct**  
206 **gene expression profiles**

207 To unravel the molecular basis for the metastatic capacity of the inherent 4T1- Sca-1<sup>+</sup>  
208 population and the Tu-Gr1<sup>+</sup>CD11b<sup>+</sup> induced Sca-1<sup>+</sup> population, we first performed  
209 transcriptomic profiling of 4T1-Sca-1<sup>+</sup> and 4T1-Sca-1<sup>-</sup> cells isolated from the parental 4T1  
210 line. Pathway enrichment analysis showed that 4T1-Sca-1<sup>+</sup> and 4T1-Sca-1<sup>-</sup> cells  
211 expressed different genes associated with distinct signaling pathways (Fig. 3a). The top  
212 200 significantly upregulated and downregulated genes were extracted as Sca1 Positive  
213 and Sca1 Negative signatures, respectively (Supplementary Table 1). Next, we performed  
214 transcriptomic profiling of Tu-Gr1<sup>+</sup>CD11b<sup>+</sup>-primed 4T1, Spl-Gr1<sup>+</sup>CD11b<sup>+</sup>-primed 4T1 and  
215 parental 4T1 cells. Pathway enrichment analysis revealed that Tu-Gr1<sup>+</sup>CD11b<sup>+</sup> and Spl-  
216 Gr1<sup>+</sup>CD11b<sup>+</sup> priming induced distinct transcriptomic alterations in 4T1 cells (Fig. 3b). To  
217 focus on the transcriptomic alternations related to the Sca-1<sup>+</sup> population conversion, we  
218 compared Tu-Gr1<sup>+</sup>CD11b<sup>+</sup>-primed vs Spl-Gr1<sup>+</sup>CD11b<sup>+</sup>-primed cells. Interestingly, Tu-  
219 Gr1<sup>+</sup>CD11b<sup>+</sup>-primed 4T1 cells expressed both Sca-1 Positive and Sca-1 Negative  
220 signatures (Fig. 3c), suggesting that Tu-Gr1<sup>+</sup>CD11b<sup>+</sup> may twist tumor plasticity by  
221 converting the 4T1-Sca-1<sup>-</sup> cells into 4T1-Sca-1<sup>+</sup> cells, rather than expanding the pre-  
222 existing 4T1-Sca-1<sup>+</sup> population.

223 To test whether, despite the diverse transcriptional profiles across different Sca-1<sup>+</sup>  
224 populations, there could be a common molecular mechanism underlying their induction  
225 and metastatic capacity, we compared the significantly differentially expressed genes  
226 between 4T1-Sca-1<sup>+</sup> versus 4T1-Sca-1<sup>-</sup> and Tu-Gr1<sup>+</sup>CD11b<sup>+</sup> primed 4T1 versus Spl-  
227 Gr1<sup>+</sup>CD11b<sup>+</sup> primed 4T1 cells. Strikingly, among a total of 1118 up- and 423 down-  
228 regulated genes found when comparing the two conditions, only 56 up- and one down-  
229 regulated genes were shared (Fig. 3d and Supplementary Table 1). This observation was  
230 consistent with the notion that the Sca-1<sup>+</sup> population in Tu-Gr1<sup>+</sup>CD11b<sup>+</sup> primed 4T1 cells  
231 was different from the inherent 4T1-Sca-1<sup>+</sup> cells. Nonetheless, the fact that the 4T1-Sca-

232 1<sup>+</sup> cells and Tu-Gr1<sup>+</sup>CD11b<sup>+</sup> primed 4T1 cells possessed similar *in vivo* metastatic capacity  
233 suggested that among these common pathways some were relevant for 4T1 metastases  
234 formation. To this end, we analyzed the publicly available scRNA-seq dataset from 4T1  
235 primary tumors of Sebastian et al. <sup>43</sup>. In this dataset, several cell types, including cancer  
236 cells, epithelial cells, fibroblasts, distinct subpopulations of myeloid cells were identified <sup>43</sup>.  
237 To determine significant ligand-receptor interactions from the scRNA-seq data, we  
238 performed cell-cell interaction analysis with CellPhoneDB <sup>44</sup> by focusing on the interactions  
239 between epithelial/cancer cells and myeloid cells (Fig. 3e, f). The analysis identified 160  
240 ligand-receptor interaction pairs (Supplementary Table 2). Among those pairs, OSM  
241 receptor (OSMR) and Pyrimidinergic receptor P2Y6 (P2RY6) were the only ones present  
242 inside the 56 common genes shown in Fig. 3d. However, P2RY6 interacts with COPA  
243 (Coatomer Complex Subunit Alpha), a membrane protein involved in membrane traffic  
244 between endoplasmic reticulum and Golgi <sup>45</sup> and, thus, unlikely to mediate cell-cell contact-  
245 independent induction of Sca-1<sup>+</sup> population. As the IL6-JAK-STAT3 signaling pathway was  
246 upregulated both in the 4T1-Sca-1<sup>+</sup> population and Tu-Gr1<sup>+</sup>CD11b<sup>+</sup>-primed 4T1 cells (Fig.  
247 3a, b), we next examined the expression of *Osm*, *Osmr*, *Il6st*, *Il6*, and *Il6* receptor (*Il6ra*) in  
248 the Sebastian dataset (Fig. 3g). The expression of *Il6* and *Osm* was restricted to myeloid  
249 cells, with *Osm* expression being more prominent, similar to a previous report <sup>33</sup>. *Osmr* was  
250 predominantly expressed in tumor cells, while *Il6st* and *Il6ra* were homogenously  
251 expressed in all cell types.

252 We then explored their expression in the 4T1-Sca-1<sup>+</sup> cells and Tu-Gr1<sup>+</sup>CD11b<sup>+</sup>  
253 primed 4T1 cells. *Osm* and *Il6* expression were very low in all samples (normalized count  
254 number less than 7 on average) (Fig. 3h, i), consistent with data in the Sebastian dataset  
255 (Fig. 3g). *Osmr* and *Il6ra*, however, were highly expressed in 4T1-Sca-1<sup>+</sup> cells compared  
256 with 4T1-Sca-1<sup>-</sup> cells, while the expression of *Il6st* was abundant in both populations,

257 though higher in 4T1-Sca-1<sup>+</sup> cells (Fig. 3h). On the other hand, only *Osmr* was significantly  
258 upregulated in Tu-Gr1<sup>+</sup>CD11b<sup>+</sup> primed 4T1 compared with Spl-Gr1<sup>+</sup>CD11b<sup>+</sup> primed 4T1  
259 (Fig. 3i).

260 Taken together, these results suggest that OSM/OSMR and IL6/IL6R signaling  
261 pathways may be involved in the Tu-Gr1<sup>+</sup>CD11b<sup>+</sup>-mediated expansion of 4T1-Sca-1<sup>+</sup> cells.

262

### 263 **Tu-Gr1<sup>+</sup>CD11b<sup>+</sup> cells promote Sca-1<sup>-</sup> to Sca-1<sup>+</sup> population conversion**

264 The above results strongly implied that Tu-Gr1<sup>+</sup>CD11b<sup>+</sup> cells convert Sca-1<sup>-</sup>  
265 population into the Sca-1<sup>+</sup> one. To further test this hypothesis, we compared the cell  
266 population dynamics in cultured cells and the orthotopic primary tumor by analyzing  
267 publicly available scRNA-seq datasets. By integrating scRNA-seq data from 3D cultured  
268 4T1 cells (GSM4812003)<sup>46</sup> and tumor cells isolated from orthotopically fat pad-injected 4T1  
269 primary tumor (PT) (GSM3502134)<sup>47</sup> (Fig. 4a, b), we observed 5 clusters. Clusters 0, 1, 2,  
270 4 were predominant in cultured tumor cells, while cluster 3 was predominant in primary  
271 tumors. Single-cell trajectories analysis confirmed that cluster 3 was at the end of the  
272 transformation process (Fig. 4c, d). The population dynamics also showed that the fraction  
273 of cells in clusters 1, 2 and 4 decreased during the transformation, the one in cluster 0 only  
274 minimally increased, while the fraction in cluster 3 massively increased (Fig. 4e).  
275 Importantly, very few cultured 4T1 cells expressed *Sca-1* while it was abundantly  
276 expressed in the majority of cells in the primary tumor (Supplementary Fig. 4a, upper  
277 panel). Consistently, the fraction of cells expressing *Osmr* was higher in the primary tumor  
278 compared to cultured cells (Supplementary Fig. 4a, lower panel). Similar observations  
279 were obtained when analyzing scRNA-seq data from ER<sup>+</sup> human breast cancer model  
280 MCF-7. After integrating data from cultured MCF-7 cells (GSM4681765) and tumor cells  
281 that were isolated from MCF-7 intraductal injected mammary gland (GSM5904917)<sup>48</sup>, 6

282 clusters were identified (Fig. 4f), with clusters 1 and 3 predominant in the cultured MCF-7  
283 cells, while clusters 2 and 4 were predominant in the primary tumor (Fig. 4g). Further  
284 analysis showed that clusters 2 and 4 expanded during *in vitro* to *in vivo* tumor cell  
285 transformation and represented nearly 50% of the *in vivo* primary tumor cells (Fig. 4h-j).  
286 Although there is no human homolog of *Sca1* gene, *OSMR* expressing cells were  
287 increased upon tumor implantation, especially in clusters 2 and 1 (Supplementary Fig.4b).

288 To further investigate the signals involved in this transformation, we performed  
289 GSAE analysis for cluster 3 in 4T1 cells and clusters 2 and 4 in MCF-7 cells, respectively  
290 (Fig. 4k-n). By comparing the Hallmark gene signatures, IL6-JAK-STAT3 signature was  
291 significantly upregulated in both cell populations (Fig. 4k, m). Interestingly, *Sca1* Positive  
292 and *Sca1* Negative signatures were both upregulated (Fig. 4l, n), which is consistent with  
293 our *ex vivo* induction experiment (Fig. 3c). To validate the involvement of Tu-Gr1<sup>+</sup>CD11b<sup>+</sup>  
294 during the cell population transformation, we extracted the top 50 upregulated genes  
295 (Supplementary Table 3) identified by comparing the Tu-Gr1<sup>+</sup>CD11b<sup>+</sup> with the Sp-  
296 Gr1<sup>+</sup>CD11b<sup>+</sup>-stimulated 4T1 cells as Tu-Gr1<sup>+</sup>CD11b<sup>+</sup> induced signature. Both cell  
297 populations predominant in the primary tumor in both 4T1 and MCF-7 models, upregulated  
298 the Tu-Gr1<sup>+</sup>CD11b<sup>+</sup> induced signature (Fig. 4l, n).

299 These data, together with our *in vivo* observations (Fig. 1a-c) and *ex vivo* coculture  
300 experiments (Fig. 2b-e and Fig. 3c), indicate that Tu-Gr1<sup>+</sup>CD11b<sup>+</sup> convert the *Sca1*<sup>-</sup>  
301 population to *Sca1*<sup>+</sup> population, likely, via OSM/IL6 signaling pathway.

302  
303 **OSM/IL6-JAK pathway mediates Tu-Gr1<sup>+</sup>CD11b<sup>+</sup>-induced *Sca1*<sup>+</sup> population**  
304 **enrichment**

305 To experimentally interrogate the role of OSM/IL6 in modulating the *Sca1*<sup>+</sup>  
306 population, we first measured *Osm* and *Il6* mRNA expression in Spl-Gr1<sup>+</sup>CD11b<sup>+</sup> and Tu-

307 Gr1<sup>+</sup>CD11b<sup>+</sup>. Indeed, both *Osm* and *Il6* mRNA levels were significantly elevated in Tu-  
308 Gr1<sup>+</sup>CD11b<sup>+</sup> (Fig. 5a). To functionally validate the role of OSM/IL6 in the generation of  
309 Sca-1<sup>+</sup> population, we treated 4T1 cells directly with recombinant OSM and IL6 proteins *in*  
310 *vitro* and measured the effect on the Sca-1<sup>+</sup> population. After 2 days of treatment, both  
311 OSM and IL6 significantly increased the frequency of Sca-1<sup>+</sup> cells from 16% to 38.8% and  
312 26.5%, respectively (Fig. 5b). Conversely, blocking OSM and IL6 activities using anti- OSM  
313 or -IL6 neutralizing antibodies significantly reduced the emergence of Sca-1<sup>+</sup> population  
314 induced by Tu-Gr1<sup>+</sup>CD11b<sup>+</sup> conditioned medium (Fig. 5c). The combination of anti-OSM  
315 and -IL6 antibodies did not have additive effects suggesting that OSM and IL6 both  
316 contribute in promoting Sca-1<sup>+</sup> population by sharing the same signaling cascades.

317 OSMR and IL6R signal by activating the intracellular Janus tyrosine kinase (JAK)  
318 <sup>49</sup>. To explore the involvement of the JAK pathway in the emergence of the Sca-1<sup>+</sup>  
319 population, we treated 4T1 cells with the JAK inhibitor (Ruxolitinib) during exposure to  
320 recombinant OSM and IL6. Ruxolitinib treatment prevented the emergence of the Sca-1<sup>+</sup>  
321 population in response to recombinant OSM and IL6 (Fig. 5d).

322 From these results, we conclude that OSM/IL6-JAK pathway mediates Tu-  
323 Gr1<sup>+</sup>CD11b<sup>+</sup> -induced Sca-1<sup>+</sup> population enrichment.

324  
325 **Tu-Gr1<sup>+</sup>CD11b<sup>+</sup>-induced Sca-1<sup>+</sup> population and 4T1-inherent Sca-1<sup>+</sup> population have**  
326 **distinct CSC and EMT gene expression profiles**

327 OSM/IL6-JAK signaling has been reported to support tumor progression by promoting  
328 a CSC phenotype and epithelial-mesenchymal plasticity <sup>25,36,50</sup>. To further characterize  
329 CSC and EMT features in 4T1-Sca-1<sup>+</sup> cells and Tu-Gr1<sup>+</sup>CD11b<sup>+</sup> induced Sca-1<sup>+</sup>  
330 population, we used our RNAseq data to explore the expression of 17 stem cell and EMT  
331 markers (Supplementary Fig. 5). The stem cell markers *Oct4* (*Pou5f1*), *Sox2* and *Nanog*

332 were undetectable or very low in all or some samples. 4T1-Sca-1<sup>+</sup> cells had higher  
333 expression of *Aldh1a1*, *Aldh3a1* and *Podxl* but lower expression of *Klf4* and *Sox9*  
334 compared to 4T1-Sca-1<sup>-</sup> cells. There was no difference in the expression of *Abcg2* and  
335 *Has2*. Tu-Gr1<sup>+</sup>CD11b<sup>+</sup> primed 4T1 cells had higher expression of *Klf4* and *Has2*, lower  
336 expression of *Aldh1a1*, *Aldh3a1* and *Sox9*, and similar expression of *Podxl* when  
337 compared with Spl-Gr1<sup>+</sup>CD11b<sup>+</sup> primed 4T1. Among them, only *Has2* expression was  
338 specifically elevated in Tu-Gr1<sup>+</sup>CD11b<sup>+</sup> primed 4T1 compared with control 4T1 and Spl-  
339 Gr1<sup>+</sup>CD11b<sup>+</sup>-primed 4T1 (Supplementary Fig. 5a). On the other hand, 4T1-Sca-1<sup>+</sup> cells  
340 had lower expression of *Cdh1* and higher expression of *Snail1*, *Twist1*, *Vim* and *Foxc1*  
341 which support an EMT status, although *Zeb1* expression was reduced (Supplementary Fig.  
342 5b). Globally, the expression of most of the EMT genes were similar between Tu-  
343 Gr1<sup>+</sup>CD11b<sup>+</sup> and Spl-Gr1<sup>+</sup>CD11b<sup>+</sup> primed 4T1 cells, except for *Snail2* and *Vim*, whose  
344 expression was suppressed in Tu-Gr1<sup>+</sup>CD11b<sup>+</sup> primed 4T1 (Supplementary Fig. 5b).

345 Taken together, these results indicate that the Tu-Gr1<sup>+</sup>CD11b<sup>+</sup>-induced Sca-1<sup>+</sup>  
346 population and inherent Sca-1<sup>+</sup> population have different CSC and EMT transcriptional  
347 profiles, reinforcing the notion that, Tu-Gr1<sup>+</sup>CD11b<sup>+</sup>-induced Sca-1<sup>+</sup> population are not just  
348 enriched tumor-inherent Sca-1<sup>+</sup> population

349

### 350 **Chemotherapy enriches a Sca-1<sup>+</sup> population with CSC features**

351 CSC and cancer cell plasticity contribute to drug resistance in various tumor types,  
352 including breast cancer<sup>51–55</sup>. The above results, including the significantly elevated  
353 expression of *Aldh3a1* (a marker of drug resistance) in the 4T1-Sca-1<sup>+</sup> population  
354 prompted us to investigate the resistance of this population to chemotherapy. To this end,  
355 we treated 4T1 cells for 48 hours *in vitro* with methotrexate (MTX) and doxorubicin (Dox),  
356 two widely used chemotherapy drugs, including in breast cancer. The 48 hours treatment



357 of either drug increased the frequency of Sca-1<sup>+</sup> population in 4T1 cells (Fig. 6a). Next, we  
358 mimicked a clinically relevant situation of cancer cells escaping chemotherapy by exposing  
359 4T1 cells to 28 nM MTX, which is slightly higher than the IC<sub>50</sub> concentration of the drug  
360 (REF!!), for up to 3 weeks and recovered the surviving cells by switching to normal medium  
361 (Fig. 6b). The selected cell line, named MR13, was highly enriched in Sca-1<sup>+</sup> cells (>60%)  
362 (Fig. 6c). Compared to parental 4T1 tumor cells, MR13 cells exhibited a higher  
363 mammosphere forming efficiency (Fig. 6d), lower *in vitro* proliferative capacity (Fig. 6e),  
364 increased survival under non-adhesive conditions (Fig. 6f) and increased cell mobility (Fig.  
365 6g), which were consistent with CSC-like properties. When tested in a 48-hours cytotoxicity  
366 assay, MR13 cells were more resistant against MTX compared to parental 4T1  
367 (Supplementary Fig. 6a).

368

### 369 **MR13-derived tumors are highly metastatic and rich in Gr1<sup>high</sup>CD11b<sup>+</sup> Ly6C<sup>low</sup> cells**

370 To characterize the *in vivo* behavior of MR13 cells, we orthotopically implanted them  
371 into BALB/c mice and monitored the progression. MR13 cells formed smaller primary  
372 tumors relative to parental 4T1 cells, that were more metastatic to the lung (Fig. 6h-j) and  
373 enriched in Gr1<sup>high</sup>CD11b<sup>+</sup> Ly6C<sup>low</sup> cells compared to 4T1 tumors (Fig. 6k), similarly to 4T1-  
374 Sca-1<sup>+</sup>-derived tumors (Fig. 2a). Strikingly, we observed metastases in the heart  
375 (Supplementary Fig. 6b), which we never observed with the parental 4T1 cells. MR13 cells  
376 retained a large fraction of the Sca-1<sup>+</sup> population *in vitro*, even when cultured in the  
377 absence of MTX (Fig. 6c) and upon *in vivo* expansion (Fig. 6l). Such stability of Sca-1  
378 population contrasted with 4T1-Sca-1<sup>+</sup> cells and Tu-Gr1<sup>+</sup>CD11b<sup>+</sup>-primed 4T1 cells  
379 (Supplementary Fig. 2e, g) that, upon isolation or induction reverted to a Sca-1<sup>-</sup> phenotype,  
380 suggesting that MR13 line was capable of self-sustain its own Sca-1<sup>+</sup> population.



381 Taken together, chemotherapy-selected MR13 cells share some similar *in vivo*  
382 characteristics as 4T1-Sca-1<sup>+</sup> cells, while they are capable of self-sustaining high Sca-1<sup>+</sup>  
383 abundancy both *in vitro* and *in vivo*.

384  
385 **IL6/IL6R-JAK autocrine signaling maintains Sca-1 positivity and metastatic capacity**  
386 **in MR13 cells**

387 To better understand the chemotherapy-induced alterations in MR13 cells, we  
388 performed transcriptomic analyses comparing MR13 and parental 4T1 cells. Pathway  
389 enrichment analysis showed that the IL6-JAK-STAT3 signature was also elevated in MR13  
390 cells (Fig. 7a). Importantly, MR13 gene expression significantly positively correlated with  
391 the Sca1 Positive signature. At the same time, it negatively correlated with the Sca1  
392 Negative signature (Fig. 7b). This observation suggested that chemotherapy enriched for  
393 the inherent 4T1-Sca-1<sup>+</sup> population, rather than converting plastic Sca-1<sup>-</sup> cells, as observed  
394 upon Tu-Gr1<sup>+</sup>CD11b<sup>+</sup>-stimulation. In addition, *Osmr*, *Il6*, *Il6ra* and *Il6st* were all  
395 overexpressed in MR13 cells compared to parental 4T1 cells, while the *Osm* expression  
396 was not altered (Fig. 7c). To functionally validate the IL6-JAK signaling pathway in Sca-1<sup>+</sup>  
397 population maintenance, we treated MR13 cells with Ruxolitinib *in vitro* for 48 hours. The  
398 treatment significantly decreased the fraction of Sca-1<sup>+</sup> cells (Fig. 7d). Importantly, *in vitro*  
399 treatment of MR13 cells with Ruxolitinib for 3 days nearly completely abolished their lung  
400 metastatic capacity upon tail vein injection (Fig. 7e-f).

401 Altogether, these data suggest that MR13 cells sustain the metastatic Sca-1<sup>+</sup>  
402 population through cell-autonomous activation of the IL6-JAK signaling pathway.

403  
404 **Tu-Gr1<sup>+</sup>CD11b<sup>+</sup> invoked tumor cell signature predicts shorter overall and relapse-**  
405 **free survival in breast cancer patients**

406 To evaluate the clinical relevance of the crosstalk between Tu-Gr1<sup>+</sup>CD11b<sup>+</sup> and tumor  
407 cells, we tested whether the Tu-Gr1<sup>+</sup>CD11b<sup>+</sup>-induced 4T1 signature could predict cancer  
408 progression in patients. To this end, we interrogated the METABRIC dataset <sup>56</sup> with the  
409 Tu-Gr1<sup>+</sup>CD11b<sup>+</sup>-induced signature. Thirty-two human orthologue genes (Supplementary  
410 Table 3) in the murine 50 genes signature were present in the METABRIC dataset. Patients  
411 with the higher expression level of the signature had shorter overall survival (OS;  $p =$   
412 0.0056) and relapse-free survival (RFS;  $p = 0.032$ ) (Fig. 8a, b). Notably, OSM expression  
413 positively correlated with the signature in all patients (Supplementary Fig. 7a), suggesting  
414 OSM do contribute to altered signature expression in patients. Of the thirty-two genes, five  
415 (*MX1*, *IRF7*, *OAS1*, *CMPK2*, *ISG15*) were commonly discriminant for a shorter OS and  
416 RFS (Fig. 8c, d), and taken together, they further enhanced the predictive power (OS:  
417  $p=0.00055$ ; RFS:  $p=0.00069$ ) (Fig. 8e, f).

418 These data indicate that a small set of genes issued from the murine tumor cell  
419 signature invoked by Tu-Gr1<sup>+</sup>CD11b<sup>+</sup> cells can predict a shorter OS and RFS in breast  
420 cancer patients, thereby reinforcing the clinical significance of the proposed model.

421

## 422 **Discussion (1470 words -> 1689 NOW ... OMG)**

423 Metastatic disease and therapy resistance are the leading causes of breast cancer  
424 mortality, calling for novel approaches to effectively prevent and cure for metastasis and  
425 therapy resistance. This is particularly relevant for TNBC, where in spite of the recent  
426 encouraging results with targeted therapies, such as PARP inhibitors for tumors with  
427 germline BRCA mutations, or checkpoint inhibitors for PD-L1<sup>+</sup> tumors, management of  
428 metastatic disease remains challenging <sup>57-60</sup>. It has been proposed that CSCs present in  
429 the primary tumor are responsible for tumor persistence, metastasis, and therapy  
430 resistance <sup>52,61</sup>. Enrichment and differentiation of CSC contribute to tumor heterogeneity

431 17,19–22. Importantly, CSC features can be intrinsic or plastic and be modulated by cues from  
432 the TME<sup>62–64</sup>.

433 Here, we have interrogated the contribution of the Sca-1<sup>+</sup> population to breast  
434 cancer metastasis and its modulation by the TME. We reported that tumor-educated  
435 Gr1<sup>+</sup>CD11b<sup>+</sup> cells (Tu-Gr1<sup>+</sup>CD11b<sup>+</sup>) instigate cancer metastasis by twisting cancer cell  
436 plasticity and enriching for a Sca-1<sup>+</sup> population, with enhanced metastatic capacity. We  
437 identified OSM/IL6-JAK as a paracrine communication axis between Tu-Gr1<sup>+</sup>CD11b<sup>+</sup> and  
438 breast cancer cells and as an autocrine loop in chemotherapy-resistant tumor cells,  
439 promoting tumor heterogeneity, CSC features and metastatic capacity. Importantly, breast  
440 cancer patients expressing high levels of the human orthologues of the gene expression  
441 signatures invoked by Tu-Gr1<sup>+</sup>CD11b<sup>+</sup> have significantly shorter OS and RFS, reinforcing  
442 the clinical significance of our findings. While some of these elements have been reported  
443 individually before, our results extend these observations by providing an integrative view  
444 of paracrine (Tu-Gr1<sup>+</sup>CD11b<sup>+</sup>-induced) and autocrine (chemotherapy-induced)  
445 communication in regulating tumor heterogeneity, cancer cell plasticity, metastasis, and  
446 resistance to chemotherapy.

447 A main observation stemming from this study is that Sca-1<sup>+</sup> population exists under  
448 three different conditions: as inherent 4T1-Sca-1<sup>+</sup> population, upon exposure to Tu-  
449 Gr1<sup>+</sup>CD11b<sup>+</sup> cells and upon chemotherapy treatment (MR13). All these populations had  
450 higher metastatic ability compared to their counterpart controls. GSEA analysis  
451 suggested that the Tu-Gr1<sup>+</sup>CD11b<sup>+</sup>-induced Sca-1<sup>+</sup> population was likely to convert from  
452 the Sca-1<sup>-</sup> population (Fig. 3c and Fig. 4), while the Sca-1<sup>+</sup> population surviving  
453 chemotherapy (MR13) appeared to be enriched from an inherent Sca-1<sup>+</sup> population (Fig.  
454 7b). In addition, the different gene expression signature of Tu-Gr1<sup>+</sup>CD11b<sup>+</sup>-induced Sca-  
455 1<sup>+</sup> population relative to the inherent Sca-1<sup>+</sup> cells suggest a remarkable functional

456 plasticity of these cells. This plasticity is further supported by comparing single cell gene  
457 expression of murine 4T1 and human MCF-7 breast cancer cells, using publicly available  
458 scRNA-seq datasets, before and after *in vivo* growth (Fig. 4). *In vivo*, tumor cells undergo  
459 a transformation enriching for Sca-1 (in the mouse), OSMR expressing cells, Sca1  
460 Positive, Sca1 Negative and Tu-Gr1<sup>+</sup>CD11b<sup>+</sup>-induced signatures, and IL6-JAK signaling  
461 pathway from precursor cells (Sca-1<sup>-</sup> in the mouse) (Fig. 4). Gong *et al.* have reported  
462 that sorted Sca-1<sup>-</sup> 4T1 cells could be transiently transformed into a Sca-1<sup>+</sup> population by  
463 radiotherapy<sup>65</sup>. An analogous observation was reported in colorectal cancer, where  
464 selective ablation of LGR5<sup>+</sup> CSCs in organoids leads to initial tumor regression, followed  
465 by regrowth driven by LGR5<sup>+</sup> CSCs reemerging from the LGR5<sup>-</sup> population<sup>66</sup>. Taken  
466 together, our observations further consolidate the notion that cancer consists of a  
467 heterogenous and plastic tumor mass, including highly metastatic cell populations, by  
468 demonstrating that tumor recruited and educated Gr1<sup>+</sup>CD11b<sup>+</sup> cells contribute to such  
469 plasticity by inducing the conversion of low metastatic Sca-1<sup>-</sup> population into a highly  
470 metastatic Sca-1<sup>+</sup> population. Dedicated time course scRNA-seq analyses together with  
471 lineage tracing experiments may help to further characterize the detailed origin,  
472 development, fate, and function of these Sca-1<sup>+</sup> populations during cancer progression.

473 Recruitment and accumulation of Gr1<sup>+</sup>CD11b<sup>+</sup> cells in the TME, particularly through  
474 the chemokines CCL2, CXCL1 and CXCL2, or IL-33, is considered a critical step for their  
475 contribution to tumor progression and metastasis<sup>67-70</sup>. Consistent with these observations,  
476 tumors derived from sorted 4T1-Sca-1<sup>+</sup> cells, or MR13 cells that are intrinsically enriched  
477 for Sca-1<sup>+</sup> cells, have a higher content of Gr1<sup>high</sup>CD11b<sup>+</sup>Ly6C<sup>low</sup> cells compared to tumors  
478 derived from 4T1-Sca-1<sup>-</sup> or parental 4T1 cells, respectively (Fig. 2a and 5k). Beyond  
479 recruitment, tumor-mediated education of Gr1<sup>+</sup>CD11b<sup>+</sup> cells appears to be necessary to  
480 gain higher metastatic activity: Only Gr1<sup>+</sup>CD11b<sup>+</sup> cells recovered from primary tumors (but

481 not from spleen or bone marrow) induced Sca-1 positivity and enhanced metastatic ability  
482 in 4T1 cells (Fig. 2c, e). The role of Gr1<sup>+</sup>CD11b<sup>+</sup> cells in promoting metastasis has been  
483 mainly attributed to promotion of angiogenesis, EMT and immunosuppression<sup>17,68</sup>. Peng  
484 *et al.*, reported the ability of those cells to endow CSC-like features to breast cancer cells  
485 but their metastatic capacity was not interrogated<sup>17</sup>. Our observations suggest a self-  
486 sustaining positive feedback mechanism between highly metastatic cancer cells (Sca-1<sup>+</sup>  
487 population) and Gr1<sup>+</sup>CD11b<sup>+</sup> cells: inherent Sca1<sup>+</sup> CSC-like, metastatic, cells promote  
488 recruitment and local education of Gr1<sup>+</sup>CD11b<sup>+</sup> cells, which in turn promote tumor  
489 heterogeneity, cancer cell plasticity and metastatic capacity by converting low-metastatic  
490 Sca1<sup>-</sup> cells into additional high-metastatic Sca1<sup>+</sup> cells (Fig. 9).. Recently, it was reported  
491 that neutrophils escorting blood circulating tumor cells (CTCs) expands the metastatic  
492 potential of CTCs<sup>71</sup>. While this effect was attributed to the promotion of cell cycle  
493 progression of CTCs through direct contact with the neutrophils, in light of our findings, one  
494 may also consider the possibility that clustered neutrophils may also promote the  
495 expansion of a CSCs-like phenotype with higher metastatic capacity. Interestingly, OSM  
496 was reported to be expressed by neutrophils cocultured with breast cancer cells<sup>36</sup> and to  
497 promote phenotypic changes associated with mesenchymal and stem cell-like  
498 differentiation in breast cancer<sup>36,72</sup>. Together with our observation, these findings further  
499 reinforce the notion that boosting the *Osm* expression in Gr1<sup>+</sup>CD11b<sup>+</sup> cells is part of their  
500 educating program prompted by the tumor. One outstanding question raised by these  
501 observations is by which mechanisms and pathways cancer cells, in particular Sca-1<sup>+</sup>  
502 ones, educate Gr1<sup>+</sup>CD11b<sup>+</sup> cells to acquire cancer plasticity-promoting activity.

503 Besides directly activating tumor cells, OSM has also been shown to remodel  
504 macrophages and fibroblasts of the TME<sup>33,36</sup>. Araujo *et al.* recently reported that OSM  
505 derived from tumor-infiltrating myeloid cells reprogram fibroblasts to secrete VEGF and the

506 chemokines CXCL1 and CXCL16, resulting in enhanced myeloid cell recruitment and  
507 breast cancer progression <sup>33</sup>. Here we extend these observations by demonstrating that  
508 tumor-educated Gr1<sup>+</sup>CD11b<sup>+</sup>-derived OSM/IL6 twist cancer cell plasticity by promoting a  
509 rapid but reversible conversion of Sca-1<sup>-</sup> cells into more metastatic Sca-1<sup>+</sup> cells (Fig. 5b).  
510 We further broaden the implications of the OSM/IL6-JAK axis, by demonstrating that MR13  
511 cells that have escaped chemotherapy hijacked this paracrine mechanism in a cell  
512 autonomous manner by elevating the *Il6* expression (Fig. 9). Significantly, a short *in vitro*  
513 treatment with Ruxolitinib effectively abrogated their metastatic capacity (Fig. 7e, f).

514 While OSM/OSMR is the only interaction pair identified by the cell-cell interaction  
515 analysis (Fig. 3f, g), it is possible that other molecular mechanisms may also play roles in  
516 modulating Sca-1<sup>+</sup> cell plasticity and metastasis. One candidate is the IL6/IL6R  
517 communication axis, which was less prominent in the cell-cell communication analysis (Fig.  
518 3f, g), but was highly expressed in our experimental data in Tu-Gr1<sup>+</sup>CD11b<sup>+</sup> compared with  
519 Spl-Gr1<sup>+</sup>CD11b<sup>+</sup> (Fig. 5a), and in chemotherapy-resistant MR13 cells compared with 4T1  
520 (Fig. 7c). Moreover, the neutralization of IL6 also suppressed the Tu-Gr1<sup>+</sup>CD11b<sup>+</sup>  
521 conditioned medium induced Sca-1<sup>+</sup> cell enrichment, much alike OSM inhibition (Fig. 5c).

522 Importantly, we demonstrated that a human orthologue signature of the 4T1 gene  
523 expression signature invoked by Tu-Gr1<sup>+</sup>CD11b<sup>+</sup> can predict a significantly shorter OS and  
524 RFS in breast cancer patients (Fig. 8). This finding strengthens the clinical significance of  
525 the observed crosstalk between Tu-Gr1<sup>+</sup>CD11b<sup>+</sup> and tumor cells. Strikingly, the five genes  
526 that significantly contribute to the discriminatory power of the signature are genes related  
527 to native or viral immunity or regulated by interferon. While expression of interferons and  
528 interferon response genes in breast cancer has been mainly associated with tumor  
529 suppression and improved survival <sup>73</sup>, there is evidence also correlating interferon  
530 responses with tumor promotion, therapy resistance and reduced survival <sup>74</sup>. As

531 JAKs/STATS are activated by both IFN and OSM/IL6 receptors, it is conceivable that  
532 OSM/IL6 only activates a subset of the IFN-induced genes with tumor-promoting activity,  
533 as the case for Mx1<sup>75</sup>. Consistent with our findings, JAK/STAT signaling has recently been  
534 shown to initiate the lineage plasticity in prostate cancer as well as to promote lineage  
535 plasticity-driven targeted therapy resistance in a stem-like subpopulation of prostate cancer  
536 <sup>76,77</sup>. On the other hand, Aouad *et al.* showed that epithelial-mesenchymal plasticity is  
537 essential for the generation of a dormant cell state of ER<sup>+</sup> breast cancer during progression,  
538 and the activation of IL6-JAK-STAT signaling triggers tumor cell awakening and recurrence  
539 <sup>48</sup>.

540 One crucial question raised by these results is whether the OSM/IL6-JAK pathway is  
541 a potential actionable clinical target to impinge on metastatic progression and therapy  
542 resistance. In particular, the observation that a short *in vitro* treatment of the highly  
543 metastatic MR13 cells profoundly suppressed their metastatic capacity *in vivo* (Fig. 7e, f),  
544 suggests potential long-lasting effects consistent with an adjuvant effect. JAK inhibitors are  
545 being tested in clinical trials in breast cancer. A phase I study combining Ruxolitinib with  
546 paclitaxel in HER2-negative metastatic breast cancer showed good tolerability and  
547 evidence of activity <sup>78</sup>. A phase I/II trial of Ruxolitinib in combination with trastuzumab in  
548 metastatic HER2 positive breast cancer and a phase II study combining Ruxolitinib with  
549 capecitabine in advanced HER2<sup>-</sup> breast cancer, however, did not improve progression-free  
550 survival <sup>79,80</sup>. The absence of benefits in these studies in advanced breast cancer and our  
551 reported mechanistic observations on metastatic progression, raise the question of  
552 whether the JAK inhibitors should be considered in adjuvant setting in high-risk patients,  
553 to prevent progression to metastases, rather than treating patients already bearing  
554 metastases.

555 In conclusion, we reported here that a subpopulation of tumor cells within the tumor



556 mass educates required Gr1<sup>+</sup>CD11b<sup>+</sup> cells to convert a low metastatic subpopulation into  
557 highly metastatic one, through the OSM/IL6-JAK signaling axis (Fig. 9). The clinical  
558 relevance of this observation is supported by human transcriptomic data. This process is  
559 hijacked by tumor cells that survived chemotherapy and evolved toward a highly metastatic  
560 phenotype via cell autonomous IL6-JAK signaling. Importantly, a short *in vitro* treatment  
561 with a clinically approved JAK inhibitor, Ruxolitinib, suppresses their metastatic capacity  
562 these cells *in vivo*. These results should stimulate considering testing JAK inhibitors in the  
563 adjuvant setting in TNBC breast cancer patients at high-risk for metastatic progression.

564

565

## 566 **Methods**

567 **Cell culture.** The 4T1 murine breast cancer cell line was kindly provided by Dr Fred R.  
568 Miller (Michigan Cancer Foundation, Detroit, MI, USA). 4T1 cells were cultured in high  
569 glucose DMEM supplemented with 10% heat-inactivated FBS, 1% penicillin–streptomycin  
570 (P/S, from Gibco) and 1% Non-Essential Amino Acid (Gibco).

571

572 **Tumor models.** 4T1, MR13, sorted 4T1-Sca-1<sup>+</sup> and 4T1-Sca-1<sup>-</sup> (5x10<sup>4</sup> cells in 50µl  
573 PBS/10% of 8.1 mg/ml Matrigel Matrix, were injected in the fourth right mammary gland of  
574 mice. Prior to surgery, ketamine (1.5 mg/kg) and xylazine (150 mg/kg) (both from Graeub)  
575 were injected intra-peritoneally to anesthetize the animals. Immune cell populations were  
576 analyzed at different time points post-tumor cell injection. Tumor length and width were  
577 measured twice a week with caliper and used to calculate tumor volume by the following  
578 equation: volume = (length x width<sup>2</sup>) x π/6. Tumors were collected and weighted at  
579 necropsy. For the intravenous injections, 2x10<sup>5</sup> sorted 4T1-Sca-1<sup>+</sup> and 4T1- Sca-1<sup>-</sup> tumor  
580 cells resuspended in a volume of 50 µl of PBS were injected into the mice tail vein. Lung



581 metastases were quantified 10 days post-injection. At each indicated time point, mice were  
582 sacrificed according to defined ethical criteria and were killed by CO<sub>2</sub> inhalation followed  
583 by neck dislocation or terminal bleeding. All animal procedures were performed in  
584 accordance with the Swiss legislations on animal experimentation and approved by the  
585 Cantonal Veterinary Service of the Cantons Vaud and Fribourg for experiments in  
586 Lausanne and Fribourg (VD\_1486.2; 2017\_34\_FR; 2017\_34\_FR, 2014\_58\_FR; 2011-33-  
587 FR).

588  
589 **Reagents and chemicals.** Growth factor reduced Matrigel Matrix (MG) was obtained from  
590 Becton Dickinson (BD Biosciences). Collagenase I was purchased from Worthington and  
591 DNase I from Roche. Bovine serum albumin (BSA), crystal violet (CV) and  
592 paraformaldehyde (PFA) were obtained from Sigma-Aldrich. Drugs, inhibitors and  
593 cytokines: Doxorubicin and Methotrexate (generously provided by the Department of  
594 Oncology, University Hospital, University of Lausanne, Lausanne, Switzerland),  
595 Ruxolitinib (JAK inhibitor, Cat N°7064, Biotechne), anti-mouse Oncostatin M (R&D  
596 systems), anti-mouse IL-6 (BioXCell), recombinant mouse Oncostatin M and IL-6  
597 (Biolegend, Cat #: 762802 & 575702 respectively).

598  
599 **Antibodies.** The following anti-mouse antibodies were used following manufacturer's  
600 instructions: anti-CD16/CD32 Fc blocking antibody (BD Biosciences), anti-CD24-FITC  
601 (clone M1/69, eBioscience), anti-CD29-PE and-PE-Cy5 (clone HMβ1-1, BioLegend), anti-  
602 Sca-1-APC (clone D7, eBioscience), anti-CD61-Alexa 647 (clone 2C9.62(HMβ3-1),  
603 BioLegend, anti-CD45-PE (clone 30-F11, BD Biosciences), anti-Gr1-eFlour450 (clone  
604 RB6-8C5,eBioscience), anti-Ly6C FITC (clone HK1.4, BioLegend), anti-Ly6G-APC (clone  
605 1A8-Ly6g,eBioscience), anti-F4/80 PerCP/Cy5 (clone BM8, eBioscience), anti-CD11b-PE-

606 Cy7 (clone M1/70, eBioscience), anti-CD11c-APC-eFluor780 (clone N418, eBioscience),  
607 anti-CD4-FITC (clone 6K1.5, eBioscience), anti-CD8-PE (clone 53-6.7, eBioscience), anti-  
608 B220-APC (clone RA3-6B2, eBioscience), anti-CD49b-eFlour450 (clone DX5, BioLegend),  
609 Annexin V-APC (clone B217656, BioLegend), Propidium Iodide-PerCP (Clone V13245,  
610 Life technologies).

611  
612 **Magnetic cell sorting (MACS).** MACS separators were used for positive and negative cell  
613 selections based on manufacturer's instructions. Briefly, cells were counted and resuspend  
614 in 500  $\mu$ l of MACS buffer with 10  $\mu$ l of fluorescent coupled antibody of interest (APC-  
615 conjugated anti-Sca-1 and PE-conjugated anti-Gr1) per  $10^7$  cells added. Cells were  
616 incubated for 30 minutes in the dark at 4°C and then washed with MACS buffer. After  
617 centrifugation and resuspension in 80  $\mu$ l of MACS buffer per  $10^7$  cells, 20  $\mu$ l of anti- APC-  
618 conjugated magnetic beads (Miltenyi Biotec) per  $10^7$  cells was added. After a 20 minutes  
619 incubation in the dark at 4°C, cells were washed with MACS buffer. After the centrifugation  
620 they were resuspended in MACS buffer and the magnetic separation was performed using  
621 LS MACS column (maximum  $10^8$  labeled cells) for positive selection and LD MACS column  
622 (maximum  $10^8$  labeled cells) for negative selection (Miltenyi Biotec). The purity of positive  
623 subpopulation was >70% and <99% for the negative subpopulation.

624  
625 **Co-culture of Gr1<sup>+</sup>CD11b<sup>+</sup> cells sorted from tumors or spleen of 4T1 tumor bearing**  
626 **mice.** Gr1<sup>+</sup> cells were sorted from tumors or spleen at day 23 post-injection (see below  
627 Magnetic beads cell sorting section). Afterwards,  $1.5 \times 10^5$  4T1 cells were co-cultured in 6  
628 wells plates using Transwell plates (0.4  $\mu$ m, Nunc, ThermoFisher Scientific) with  
629 Gr1<sup>+</sup>CD11b<sup>+</sup> sorted cells (top) and 4T1 cells (bottom) at different 4T1: Gr1<sup>+</sup>CD11b<sup>+</sup> ratios

630 (1:1, 1:3 and 1:5). After 48 hours of co-culture, cells were analyzed for Sca-1 expression  
631 and gene expression by flow cytometry and semi-quantitative real-time qPCR as indicated.

632  
633 **Flow cytometry analysis on tissue samples.** Mice were sacrificed at different time points  
634 for blood and tumors collection. Tumors were cut in small pieces with scissors, washed,  
635 and digested in serum free medium supplemented with Collagenase I and DNase I  
636 (Roche). The mixture was incubated at 37 °C for 45 minutes on a shaking platform.  
637 Subsequently, serum-supplemented medium was added to neutralize the enzymatic  
638 reaction and the tissue suspensions were filtered through a 100 µm and a 70 µm sterile  
639 nylon gauzes. Upon centrifugation (5 minutes at 1400 rpm), pellets were recovered and  
640 red blood cells lysed with ACK buffer (Biolegend). The staining procedure and the flow  
641 cytometry acquisition are as described previously<sup>81</sup>. Data acquisition was performed using  
642 the FACSCalibur (BD Biosciences) or MACSQuant flow cytometer from Miltenyi Biotec and  
643 data analyzed by FlowJo v10.0.7 (tree Stat Inc.).

644  
645 ***In vitro* cell proliferation assay.** Cells were collected and seeded in tissue culture 96-  
646 wells-plates (Costar) at 3'000 cells/well. Cells were grown in complete medium for 24, 36,  
647 72 and 96 hours. At each time point cells were washed once with PBS, then fixed with 4%  
648 PFA and stained with 0.5% crystal violet solution for 0.5 hours. The stained cells were  
649 gently washed with deionized water to remove the extra dye and air-dried overnight at  
650 room temperature. After solubilizing the dye with crystal violet eluting buffer (70% ethanol  
651 and 1% acetic acid), cell viability was assessed by reading the absorbance at 595 nm  
652 wavelength in a multiwell plate reader (Modulus II microplate reader, Turner Biosystems).  
653 Results were analyzed by Prism (Graph pad software, Inc.) expressed as mean values of  
654 optical density (OD) of octuplet determinations ± SEM.

655  
656 ***In vitro* cytotoxic assay.** Tumor cells were plated at a concentration of 3'000 cell/well into  
657 96-wells plates. The following day, a series of concentrations of the different drugs were  
658 supplemented to the culture medium. Untreated control cells were kept in normal culture  
659 medium. Cell viability of each well was assessed with crystal violet staining 48 hours after  
660 treatment, as described above. Results were analyzed by Prism software by a non-linear  
661 regression analysis and expressed as relative cell viability compared with non-treated  
662 control. The 50% maximum inhibition concentrations (IC<sub>50</sub>) were used to determine the  
663 drug-resistant ability of treated cells.

664  
665 **Real-time reverse transcription qPCR and primers.** Changes in mRNA expression  
666 levels were determined by semi-quantitative real-time qPCR. RNA samples were obtained  
667 from adherent cells using RNeasy kit from QIAGEN according to manufacturer's  
668 instructions. From each sample, 1 µg RNA was retro-transcribed using SuperScript II  
669 Reverse Transcriptase kit (Life Technologies – Invitrogen), according to manufacturer's  
670 instructions. The reactions were performed in a StepOnePlus™ thermocycler (Applied  
671 Biosystems, Life Technologies – Invitrogen) using the KapaSYBR® FAST SYBR Green  
672 Master Mix (Kapa Biosystems). Each reaction was performed in triplicates and values were  
673 normalized to murine 36B4 housekeeping gene. The comparative C<sub>t</sub> method was used to  
674 calculate the difference of gene expression between samples. The following murine-  
675 specific primers (Microsynth AG) were used:

676 Sca-1 (F:5'-TCAGGAGGCAGCAGTTATTGTG-3',R: 5'-TGGCAACAGGAAGTCTTCACG-  
677 3'), 36B4(F:5'-GTGTGTCTGCAGATCGGGTAC-3',R:5'-CAGATGGATCAGCCAGGAAG-  
678 3'), OSM (F: 5'- ATGCAGACACGGCTTCTAAGA-3', R: 5'- TTGGAGCAGCCACGATTG  
679 G-3'), OSMR: (F: 5'- CATCCCGAAGCGAAGTCTTGG-3', R: 5'-

680 GGCTGGGACAGTCCATTC TAAA-3'), IL-6: (F: 5'- TACCACTTCACAAGTCGGAGGC-3',  
681 R: 5'- CTGCAAGTGCATCAT CGTTGTTC-3').

682

683 **Histopathology.** Tumors and lungs were harvested at the end of the experiments, fixed in  
684 formalin and embedded in paraffin. 5 µm thick serial sections were cut from the tissue  
685 blocks. 3-4 sections taken at 100 µm distance were stained with hematoxylin and eosin  
686 (H&E) and used to assess tumor morphology and quantify lung metastasis. Slides were  
687 scanned by Nanozoomer (Hamamatsu Photonics) and metastasis were counted manually  
688 using NDP.viewer2 software (Hamamatsu Photonics). Metastatic index was calculated by  
689 normalizing the metastasis number with the volume of primary tumor.

690

691 **Anoikis assay.** A 6 wells plate was coated with 500 µl of 3% Poly (2-hydroxyethyl  
692 methacrylate) (poly-HEMA) (Sigma-Aldrich) dissolved in 95% ethanol overnight. Wells  
693 without poly-HEMA served as control. The day after,  $2 \times 10^5$  cells resuspended in DMEM  
694 medium were seeded. The plate was incubated at 37°C for 24 hours. Cells were collected,  
695 centrifuged and resuspended in 100 µl of 1x -binding buffer (1 ml of 5x annexin-binding  
696 buffer (Life Technologies, Invitrogen) in 4 ml of deionized water). 3 µl APC annexin V  
697 (BioLegend) and 1 µl of 100 µg/ml Propidium Iodide (PI) working solution (5 µl of 1mg/ml  
698 PI stock, Life Technologies, Invitrogen) in 45 µl of 1x annexin-binding buffer) were added  
699 to each 100 µl cell suspension. Cells were incubated for 15 minutes at room temperature  
700 protected from light. 200 µl of 1x annexin V-binding buffer was added to the cells and  
701 samples were kept on ice. Apoptotic (Annexin V<sup>pos</sup> and PI<sup>neg</sup>) and dead (PI<sup>pos</sup>) cells were  
702 analyzed by flow cytometry. Results were expressed as percentage of dead cells ± SEM.

703

704 **Mammosphere-forming assay** 5'000 cells/well were seeded in non-adhesive U bottom  
705 96-wells plate in a semi-solid MEGM medium supplemented with 20 ng/ml EGF, and 20  
706 ng/ml bFGF and heparin. Medium was gently replaced every 3 to 4 days. After 11 to 14  
707 days culture, mammospheres of 50 to 150  $\mu\text{m}$  diameter were detected under the  
708 microscope (bright field) and counted to quantify the sphere formation efficiency (SFE) as  
709 percentage of the initial number of seeded cells per well.

710  
711 **Bulk RNA sequencing and data analysis.** Four independent sorts of 4T1-Sca-1<sup>+</sup> and  
712 4T1-Sca-1<sup>-</sup> cells (as described in the magnetic cell sorting section) or four independent 4T1  
713 cells primed with Tu- Gr1<sup>+</sup>CD11b<sup>+</sup> or Spl-Gr1<sup>+</sup>CD11b<sup>+</sup> were prepared. RNAs of these cells  
714 were isolated using the NucleoSpin RNA protocol of Macherey-Nagel (as described in real-  
715 time (RT) qPCR and primers section). Samples were normalized for 1  $\mu\text{g}$  RNA in a volume  
716 of 20  $\mu\text{l}$ , sequenced on the NextSeq500 sequencer using the NextSeq 500/550 HT reagent  
717 v2 kit (Illumina) at the Swiss Integrative Center for Human Health (SICHH) in Fribourg, or  
718 the Lausanne Genomics Technologies Facility (GTF, UNIL) in Lausanne, Switzerland. For  
719 data analysis, all sequencing reads were processed for quality control, removal of low  
720 quality reads, adaptor sequence and ribosomal RNA by fastqc (0.11.8)<sup>82</sup>, multiqc (1.9)<sup>83</sup>,  
721 Trimmomatic (0.39)<sup>84</sup> and SortMeRNA(2.1)<sup>85</sup> accordingly. The filtered reads were mapped  
722 to the reference genome (mm10) using htseq-count (0.6.1)<sup>86</sup> or Salmon (0.99.0)<sup>87</sup>. The  
723 normalization of the read counts and the analysis of the differential expression between  
724 the groups of samples were performed with in R(v4.1.3), a free software environment  
725 available at <https://www.r-project.org/> using packages DESeq2 (v3.15)<sup>89</sup>. Pathway  
726 enrichment analysis was performed using packages GSVA(1.42.0)<sup>90</sup> and  
727 GSEABase(1.56.0)<sup>91</sup> with the input of DESeq2 normalized count numbers using ssgsea  
728 method comparing the Hallmark genesets from MSigDB (v7.4.1)<sup>92</sup> with default settings.

729 The significant altered pathways were determined by computing moderated t-statistics and  
730 false discovery rates with the `limma(3.50.3)`<sup>93</sup> for pair-wised comparison. The heatmaps  
731 were produced with R package `pheatmap(1.0.12)`<sup>94</sup> with default settings while pathway  
732 hierarchy clustering was performed by similarity based on Euclidean distance and the ward  
733 aggregation algorithm. The Sca1 Positive and Sca1 Negative signatures were extracted  
734 from the top 200 most upregulated or downregulated genes in 4T1-Sca-1<sup>+</sup> and 4T1-Sca-1<sup>-</sup>  
735 RNAseq data, respectively, with the threshold of adjusted p-value <0.05, fold change >1.5  
736 or <-1.5 and average normalized count number >20. For Venn diagram, the genes fulfilling  
737 the threshold of adjusted p-value < 0.05, fold change > 1.5 or < -1.5 and average  
738 normalized count number >20 are compared. The figures were produced with R package  
739 `venn (1.10)`<sup>95</sup>. Further analysis and figures generation were performed in R using  
740 packages `tidyverse(1.3.1)`<sup>96</sup>, `ggplot2(3.3.6)`<sup>97</sup>, `circlize(0.4.15)`<sup>98</sup>, `biomaRt(2.50.3)`<sup>99,100</sup>,  
741 `RColorBrewer (1.1-3)`<sup>101</sup>, `clusterProfiler (4.2.2)`<sup>102,103</sup>, `enrichplot (1.14.2)`<sup>104</sup>, `ggpubr(`  
742 `v0.4.0)`<sup>105</sup> `ggbreak (0.1.0)`<sup>105</sup>.

743  
744 **Microarray hybridization and data analysis** Experiments were performed as previously  
745 described<sup>106</sup>. Briefly, triplicates wells of cultured 4T1 and MR13 cells were used for RNA  
746 extraction using RNeasy kit (QIAGEN). Probe synthesis and GeneChip Mouse Gene Exon  
747 1.0 ST Array (Affymetrix Ltd) hybridization were performed at the GTF, UNIL, Lausanne,  
748 Switzerland. Microarray analyses were carried out with R. After quantification of gene  
749 expression with robust multi-array normalization<sup>100</sup> using the BioConductor package `Affy`,  
750 (<http://www.bioconductor.org/>) significance of differential gene expression was determined  
751 by computing moderated t-statistics and false discovery rates with the `limma` package<sup>93</sup>.  
752 Annotation was based on the genome version NCBI Build 36 (Feb. 2006). The obtained p-  
753 values were corrected for multiple testing by calculating estimated false discovery rates



754 (FDR) using the method of Benjamini-Hochberg. Heatmaps were produced by color-coding  
755 gene-wise standardized log gene expression levels (mean zero standard deviation one).  
756 Probe-sets were shown hierarchically clustered by similarity based on Euclidean distance  
757 and the ward aggregation algorithm.

758  
759 **Public RNAseq data analysis** The RPKM normalized gene expression data in Ross  
760 dataset (GSE150928) from multiple murine models of breast cancer metastasis was  
761 obtained from Gene Expression Omnibus (GEO) in the NCBI data repository. The data  
762 were analyzed and plot with R package tidyverse(1.3.1)<sup>96</sup>, ggplot2 (3.3.6)<sup>97</sup> and ggpubr  
763 (v0.4.0)<sup>107</sup>. The single-cell RNAseq data in Sebastian dataset<sup>43</sup> was obtained from Dryad  
764 data repository (<https://doi.org/10.6071/M3238R>). The data were analyzed with R package  
765 Seurat (3.0)<sup>108</sup>. The tumor and different myeloid cell populations were extracted for cell-  
766 cell interaction analysis using CellPhonDB (2.0)<sup>44</sup>. The identified interaction pairs were  
767 extracted and plot using circlize (0.4.15)<sup>98</sup> and ComplexHeatmap (2.11.2)<sup>109</sup>. The ligands  
768 and receptors annotated in the circular plot were compiled from databases in  
769 CellTalkDB<sup>110</sup>, SingleCellSignalR<sup>111</sup>. To investigate the tumor cell dynamics, datasets for  
770 4T1 (GSE158844 and GSM3502134) and MCF-7 (GSM4681765 and GSM5904917) were  
771 obtained from GEO. The data were filtered and normalized separately before merging with  
772 IntegrateData function included in Seurat. Cell cycle regression was performed according  
773 to the standard protocol of Seurat. For MCF-7, due the huge difference of the sample size,  
774 2000 cells were randomly selected from GSM4681765 data, and then merged with  
775 GSM5904917. Single-cell trajectories analysis was performed with monocle 3<sup>112-115</sup> with  
776 default settings and the root and start point were selected manually for pseudotime  
777 calculation. The GSEA analysis of selected clusters was performed with R package  
778 fgsea<sup>116</sup> and the gene rank was calculated with Wilcoxon rank sum test and auROC



779 analysis using wilcoxauc function included in presto package. The Tu-Gr1<sup>+</sup>CD11b<sup>+</sup>-  
780 induced signature was extracted by comparing gene expression between Tu-Gr1<sup>+</sup>CD11b<sup>+</sup>  
781 and Spl-Gr1<sup>+</sup>CD11b<sup>+</sup>-educated 4T1 cells with adjusted p-value <0.05, fold change >2, and  
782 the top 50 genes were selected.

783  
784 **Clinical data analysis.** To validate our finding in clinical data, the human orthologs of  
785 murine Tu-Gr1<sup>+</sup>CD11b<sup>+</sup>-induced signature genes were used. Conversion from murine to  
786 human gene symbols and Entrez IDs was performed with the biomaRt package (2.46.3)  
787 <sup>99,100</sup>, using the reference mart <https://dec2021.archive.ensembl.org>. Molecular Taxonomy  
788 of Breast Cancer International Consortium (METABRIC) breast cancer data was  
789 downloaded from cBioPortal <sup>117–119</sup> in August 2022, and expression data was log2  
790 transformed. Expression values were stratified in two groups by median values. Survival  
791 curves were generated using the ggsvplot function from the survminer package  
792 (0.4.9)<sup>107</sup>, and were compared between groups using a log-rank test. Survival curves were  
793 created using the survfit function from the survival package (3.2.11) <sup>120</sup>. Cox proportional  
794 hazard regression model was performed through the coxph function of the same package.

795 **Statistical analyses.** Unless specified, the data were presented as mean ± SEM from at  
796 least 3 independent experiments, unless otherwise indicated. Statistical comparisons  
797 were performed by an unpaired Student's t test with a two-tailed distribution or one-way  
798 ANOVA analysis of variance with Bonferroni post-test, using Prism 7.0 GraphPad  
799 Software, Inc.

800

801 **Graphic illustrations.** Illustrative schemes were created with BioRender.com.

802

803 **Data and code availability**

804 The raw and processed bulk RNAseq data used to generate figures in Fig. 3 and  
805 Supplementary Fig. 5 and microarray data used to generate figures in Fig. 7 have been  
806 deposited in the GEO database under the access code GSEXXXXXX.

807 The code used for the analyses is open-source and available through with R packages  
808 described in methods.

809

## 810 **References**

- 811 1. Fares, J., Fares, M. Y., Khachfe, H. H., Salhab, H. A. & Fares, Y. Molecular  
812 principles of metastasis: a hallmark of cancer revisited. *Signal Transduct. Target. Ther.* **5**,  
813 1–17 (2020).
- 814 2. Valdés-Mora, F. *et al.* Single-cell transcriptomics reveals involution mimicry during  
815 the specification of the basal breast cancer subtype. *Cell Rep.* **35**, 108945 (2021).
- 816 3. Yang, D. *et al.* Lineage tracing reveals the phylodynamics, plasticity, and paths of  
817 tumor evolution. *Cell* **185**, 1905-1923.e25 (2022).
- 818 4. Torborg, S. R., Li, Z., Chan, J. E. & Tammela, T. Cellular and molecular  
819 mechanisms of plasticity in cancer. *Trends Cancer* **8**, 735–746 (2022).
- 820 5. Baccelli, I. & Trumpp, A. The evolving concept of cancer and metastasis stem  
821 cells. *J. Cell Biol.* **198**, 281–293 (2012).
- 822 6. Lawson, D. A., Kessenbrock, K., Davis, R. T., Pervolarakis, N. & Werb, Z. Tumour  
823 heterogeneity and metastasis at single-cell resolution. *Nat. Cell Biol.* **20**, 1349–1360  
824 (2018).
- 825 7. Celià-Terrassa, T. & Jolly, M. K. Cancer Stem Cells and Epithelial-to-  
826 Mesenchymal Transition in Cancer Metastasis. *Cold Spring Harb. Perspect. Med.* **10**,  
827 a036905 (2020).
- 828 8. Dagogo-Jack, I. & Shaw, A. T. Tumour heterogeneity and resistance to cancer  
829 therapies. *Nat. Rev. Clin. Oncol.* **15**, 81–94 (2018).
- 830 9. McDonald, K.-A. *et al.* Tumor Heterogeneity Correlates with Less Immune  
831 Response and Worse Survival in Breast Cancer Patients. *Ann. Surg. Oncol.* **26**, 2191–  
832 2199 (2019).
- 833 10. Hata, A. N. *et al.* Tumor cells can follow distinct evolutionary paths to become  
834 resistant to epidermal growth factor receptor inhibition. *Nat. Med.* **22**, 262–269 (2016).

- 835 11. Ramirez, M. *et al.* Diverse drug-resistance mechanisms can emerge from drug-  
836 tolerant cancer persister cells. *Nat. Commun.* **7**, 10690 (2016).
- 837 12. Oskarsson, T., Batlle, E. & Massagué, J. Metastatic stem cells: sources, niches,  
838 and vital pathways. *Cell Stem Cell* **14**, 306–321 (2014).
- 839 13. Ye, F. *et al.* CD49f Can Act as a Biomarker for Local or Distant Recurrence in  
840 Breast Cancer. *J. Breast Cancer* **20**, 142–149 (2017).
- 841 14. Vaillant, F. *et al.* The Mammary Progenitor Marker CD61/ $\beta$ 3 Integrin Identifies  
842 Cancer Stem Cells in Mouse Models of Mammary Tumorigenesis. *Cancer Res.* **68**,  
843 7711–7717 (2008).
- 844 15. Li, J. J., Tsang, J. Y. & Tse, G. M. Tumor Microenvironment in Breast Cancer—  
845 Updates on Therapeutic Implications and Pathologic Assessment. *Cancers* **13**, 4233  
846 (2021).
- 847 16. Ge, R., Wang, Z. & Cheng, L. Tumor microenvironment heterogeneity an  
848 important mediator of prostate cancer progression and therapeutic resistance. *Npj Precis.*  
849 *Oncol.* **6**, 1–8 (2022).
- 850 17. Peng, D. *et al.* Myeloid-Derived Suppressor Cells Endow Stem-like Qualities to  
851 Breast Cancer Cells through IL6/STAT3 and NO/NOTCH Cross-talk Signaling. *Cancer*  
852 *Res.* **76**, 3156–3165 (2016).
- 853 18. Li, K. *et al.* Myeloid-derived suppressor cells as immunosuppressive regulators  
854 and therapeutic targets in cancer. *Signal Transduct. Target. Ther.* **6**, 1–25 (2021).
- 855 19. Lorusso, G. & Ruegg, C. The tumor microenvironment and its contribution to  
856 tumor evolution toward metastasis. *Histochem Cell Biol* **130**, 1091–103 (2008).
- 857 20. Sleeman, J. P. *et al.* Concepts of metastasis in flux: the stromal progression  
858 model. *Semin Cancer Biol* **22**, 174–86 (2012).
- 859 21. Cha, Y. J. & Koo, J. S. Role of Tumor-Associated Myeloid Cells in Breast Cancer.  
860 *Cells* **9**, (2020).
- 861 22. Pastaki Khoshbin, A., Eskian, M., Keshavarz-Fathi, M. & Rezaei, N. Roles of  
862 Myeloid-Derived Suppressor Cells in Cancer Metastasis: Immunosuppression and  
863 Beyond. *Arch Immunol Ther Exp Warsz* **67**, 89–102 (2019).
- 864 23. Panni, R. Z. *et al.* Tumor-induced STAT3 activation in monocytic myeloid-derived  
865 suppressor cells enhances stemness and mesenchymal properties in human pancreatic  
866 cancer. *Cancer Immunol. Immunother.* **63**, 513–528 (2014).
- 867 24. Cui, T. X. *et al.* Myeloid-derived suppressor cells enhance stemness of cancer  
868 cells by inducing microRNA101 and suppressing the corepressor CtBP2. *Immunity* **39**,

- 869 611–621 (2013).
- 870 25. Abaurrea, A., Araujo, A. M. & Caffarel, M. M. The Role of the IL-6 Cytokine Family  
871 in Epithelial–Mesenchymal Plasticity in Cancer Progression. *Int. J. Mol. Sci.* **22**, 8334  
872 (2021).
- 873 26. Zarling, J. M. *et al.* Oncostatin M: a growth regulator produced by differentiated  
874 histiocytic lymphoma cells. *Proc. Natl. Acad. Sci. U. S. A.* **83**, 9739–9743 (1986).
- 875 27. Felcher, C. M., Bogni, E. S. & Kordon, E. C. IL-6 Cytokine Family: A Putative  
876 Target for Breast Cancer Prevention and Treatment. *Int J Mol Sci* **23**, (2022).
- 877 28. Johnson, D. E., O’Keefe, R. A. & Grandis, J. R. Targeting the IL-6/JAK/STAT3  
878 signalling axis in cancer. *Nat Rev Clin Oncol* **15**, 234–248 (2018).
- 879 29. Quintas-Cardama, A. & Verstovsek, S. Molecular pathways: Jak/STAT pathway:  
880 mutations, inhibitors, and resistance. *Clin Cancer Res* **19**, 1933–40 (2013).
- 881 30. Tawara, K. *et al.* HIGH expression of OSM and IL-6 are associated with  
882 decreased breast cancer survival: synergistic induction of IL-6 secretion by OSM and IL-  
883 1beta. *Oncotarget* **10**, 2068–2085 (2019).
- 884 31. West, N. R., Murphy, L. C. & Watson, P. H. Oncostatin M suppresses oestrogen  
885 receptor- $\alpha$  expression and is associated with poor outcome in human breast cancer.  
886 *Endocr. Relat. Cancer* **19**, 181–195 (2012).
- 887 32. Guo, L. *et al.* Stat3-coordinated Lin-28-let-7-HMGA2 and miR-200-ZEB1 circuits  
888 initiate and maintain oncostatin M-driven epithelial-mesenchymal transition. *Oncogene*  
889 **32**, 5272–5282 (2013).
- 890 33. Araujo, A. M. *et al.* Stromal oncostatin M cytokine promotes breast cancer  
891 progression by reprogramming the tumor microenvironment. *J Clin Invest* **132**, (2022).
- 892 34. Bryson, B. L., Junk, D. J., Cipriano, R. & Jackson, M. W. STAT3-mediated SMAD3  
893 activation underlies Oncostatin M-induced Senescence. *Cell Cycle* **16**, 319–334 (2017).
- 894 35. Taniguchi, K. & Karin, M. IL-6 and related cytokines as the critical lynchpins  
895 between inflammation and cancer. *Semin. Immunol.* **26**, 54–74 (2014).
- 896 36. West, N. R., Murray, J. I. & Watson, P. H. Oncostatin-M promotes phenotypic  
897 changes associated with mesenchymal and stem cell-like differentiation in breast cancer.  
898 *Oncogene* **33**, 1485–1494 (2014).
- 899 37. Ross, C. *et al.* Metastasis-Specific Gene Expression in Autochthonous and  
900 Allograft Mouse Mammary Tumor Models: Stratification and Identification of Targetable  
901 Signatures. *Mol. Cancer Res. MCR* **18**, 1278–1289 (2020).
- 902 38. Fico, F., Bousquenaud, M., Rüegg, C. & Santamaria-Martínez, A. Breast Cancer

- 903 Stem Cells with Tumor- versus Metastasis-Initiating Capacities Are Modulated by  
904 TGFBR1 Inhibition. *Stem Cell Rep.* **13**, 1–9 (2019).
- 905 39. Hanahan, D. Hallmarks of Cancer: New Dimensions. *Cancer Discov.* **12**, 31–46  
906 (2022).
- 907 40. Ouzounova, M. *et al.* Monocytic and granulocytic myeloid derived suppressor cells  
908 differentially regulate spatiotemporal tumour plasticity during metastatic cascade. *Nat.*  
909 *Commun.* **8**, 14979 (2017).
- 910 41. Veglia, F., Sanseviero, E. & Gabrilovich, D. I. Myeloid-derived suppressor cells in  
911 the era of increasing myeloid cell diversity. *Nat. Rev. Immunol.* **21**, 485–498 (2021).
- 912 42. Bronte, V. *et al.* Recommendations for myeloid-derived suppressor cell  
913 nomenclature and characterization standards. *Nat. Commun.* **7**, 12150 (2016).
- 914 43. Sebastian, A. *et al.* Single-Cell Transcriptomic Analysis of Tumor-Derived  
915 Fibroblasts and Normal Tissue-Resident Fibroblasts Reveals Fibroblast Heterogeneity in  
916 Breast Cancer. *Cancers* **12**, 1307 (2020).
- 917 44. Efremova, M., Vento-Tormo, M., Teichmann, S. A. & Vento-Tormo, R.  
918 CellPhoneDB: inferring cell–cell communication from combined expression of multi-  
919 subunit ligand–receptor complexes. *Nat. Protoc.* **15**, 1484–1506 (2020).
- 920 45. Brandizzi, F. & Barlowe, C. Organization of the ER–Golgi interface for membrane  
921 traffic control. *Nat. Rev. Mol. Cell Biol.* **14**, 382–392 (2013).
- 922 46. Chen, K. *et al.* Phenotypically supervised single-cell sequencing parses within-  
923 cell-type heterogeneity. *iScience* **24**, 101991 (2021).
- 924 47. Yeo, S. K. *et al.* Single-cell RNA-sequencing reveals distinct patterns of cell state  
925 heterogeneity in mouse models of breast cancer. *eLife* **9**, e58810 (2020).
- 926 48. Aouad, P. *et al.* Epithelial-mesenchymal plasticity determines estrogen receptor  
927 positive breast cancer dormancy and epithelial reversion drives recurrence. *Nat.*  
928 *Commun.* **13**, 4975 (2022).
- 929 49. Jin, W. Role of JAK/STAT3 Signaling in the Regulation of Metastasis, the  
930 Transition of Cancer Stem Cells, and Chemoresistance of Cancer by Epithelial–  
931 Mesenchymal Transition. *Cells* **9**, 217 (2020).
- 932 50. Junk, D. J. *et al.* Oncostatin M promotes cancer cell plasticity through cooperative  
933 STAT3-SMAD3 signaling. *Oncogene* **36**, 4001–4013 (2017).
- 934 51. Naz, F., Shi, M., Sajid, S., Yang, Z. & Yu, C. Cancer stem cells: a major culprit of  
935 intra-tumor heterogeneity. *Am. J. Cancer Res.* **11**, 5782–5811 (2021).
- 936 52. Zhang, R., Tu, J. & Liu, S. Novel molecular regulators of breast cancer stem cell

- 937 plasticity and heterogeneity. *Semin Cancer Biol* **82**, 11–25 (2022).
- 938 53. Qin, S. *et al.* Emerging role of tumor cell plasticity in modifying therapeutic  
939 response. *Signal Transduct. Target. Ther.* **5**, 228 (2020).
- 940 54. Kong, D., Hughes, C. J. & Ford, H. L. Cellular Plasticity in Breast Cancer  
941 Progression and Therapy. *Front. Mol. Biosci.* **7**, 72 (2020).
- 942 55. Muzio, G., Maggiora, M., Paiuzzi, E., Oraldi, M. & Canuto, R. A. Aldehyde  
943 dehydrogenases and cell proliferation. *Free Radic. Biol. Med.* **52**, 735–746 (2012).
- 944 56. Curtis, C. *et al.* The genomic and transcriptomic architecture of 2,000 breast  
945 tumours reveals novel subgroups. *Nature* **486**, 346–352 (2012).
- 946 57. Shen, M. *et al.* A review of current progress in triple-negative breast cancer  
947 therapy. *Open Med Wars* **15**, 1143–1149 (2020).
- 948 58. Al-Mahmood, S., Sapiezynski, J., Garbuzenko, O. B. & Minko, T. Metastatic and  
949 triple-negative breast cancer: challenges and treatment options. *Drug Deliv Transl Res* **8**,  
950 1483–1507 (2018).
- 951 59. Azim, H. A., Ghosn, M., Oualla, K. & Kassem, L. Personalized treatment in  
952 metastatic triple-negative breast cancer: The outlook in 2020. *Breast J* **26**, 69–80 (2020).
- 953 60. Vagia, E., Mahalingam, D. & Cristofanilli, M. The Landscape of Targeted  
954 Therapies in TNBC. *Cancers Basel* **12**, (2020).
- 955 61. Hua, Z., White, J. & Zhou, J. Cancer stem cells in TNBC. *Semin Cancer Biol* **82**,  
956 26–34 (2022).
- 957 62. Battle, E. & Clevers, H. Cancer stem cells revisited. *Nat Med* **23**, 1124–1134  
958 (2017).
- 959 63. Brooks, M. D., Burness, M. L. & Wicha, M. S. Therapeutic Implications of Cellular  
960 Heterogeneity and Plasticity in Breast Cancer. *Cell Stem Cell* **17**, 260–71 (2015).
- 961 64. Yeo, S. K., Wen, J., Chen, S. & Guan, J. L. Autophagy Differentially Regulates  
962 Distinct Breast Cancer Stem-like Cells in Murine Models via EGFR/Stat3 and  
963 Tgfbeta/Smad Signaling. *Cancer Res* **76**, 3397–410 (2016).
- 964 65. Gong, J. *et al.* Genotoxic stress induces Sca-1-expressing metastatic mammary  
965 cancer cells. *Mol. Oncol.* **12**, 1249–1263 (2018).
- 966 66. Shimokawa, M. *et al.* Visualization and targeting of LGR5+ human colon cancer  
967 stem cells. *Nature* **545**, 187–192 (2017).
- 968 67. Oo, M. W. *et al.* Resident stroma-secreted chemokine CCL2 governs myeloid-  
969 derived suppressor cells in the tumor microenvironment. *JCI Insight* **7**, (2022).
- 970 68. Franklin, D. A. *et al.* MEK activation modulates glycolysis and supports



- 971 suppressive myeloid cells in TNBC. *JCI Insight* **5**, (2020).
- 972 69. Bullock, K. & Richmond, A. Suppressing MDSC Recruitment to the Tumor  
973 Microenvironment by Antagonizing CXCR2 to Enhance the Efficacy of Immunotherapy.  
974 *Cancers Basel* **13**, (2021).
- 975 70. Jovanovic, I. P. *et al.* Interleukin-33/ST2 axis promotes breast cancer growth and  
976 metastases by facilitating intratumoral accumulation of immunosuppressive and innate  
977 lymphoid cells. *Int J Cancer* **134**, 1669–82 (2014).
- 978 71. Szczerba, B. M. *et al.* Neutrophils escort circulating tumour cells to enable cell  
979 cycle progression. *Nature* **566**, 553–557 (2019).
- 980 72. Doherty, M. R. *et al.* The opposing effects of interferon-beta and oncostatin-M as  
981 regulators of cancer stem cell plasticity in triple-negative breast cancer. *Breast Cancer*  
982 *Res* **21**, 54 (2019).
- 983 73. Cavalli, L. R., Riggins, R. B., Wang, A., Clarke, R. & Haddad, B. R. Frequent loss  
984 of heterozygosity at the interferon regulatory factor-1 gene locus in breast cancer. *Breast*  
985 *Cancer Res. Treat.* **121**, 227–231 (2010).
- 986 74. Weichselbaum, R. R. *et al.* An interferon-related gene signature for DNA damage  
987 resistance is a predictive marker for chemotherapy and radiation for breast cancer. *Proc.*  
988 *Natl. Acad. Sci. U. S. A.* **105**, 18490–18495 (2008).
- 989 75. Aljohani, A. I. *et al.* Myxovirus resistance 1 (MX1) is an independent predictor of  
990 poor outcome in invasive breast cancer. *Breast Cancer Res. Treat.* **181**, 541–551 (2020).
- 991 76. Chan, J. M. *et al.* Lineage plasticity in prostate cancer depends on JAK/STAT  
992 inflammatory signaling. *Science* **377**, 1180–1191 (2022).
- 993 77. Deng, S. *et al.* Ectopic JAK–STAT activation enables the transition to a stem-like  
994 and multilineage state conferring AR-targeted therapy resistance. *Nat. Cancer* **3**, 1071–  
995 1087 (2022).
- 996 78. Lynce, F. *et al.* Phase I study of JAK1/2 inhibitor ruxolitinib with weekly paclitaxel  
997 for the treatment of HER2-negative metastatic breast cancer. *Cancer Chemother*  
998 *Pharmacol* **87**, 673–679 (2021).
- 999 79. Kearney, M. *et al.* Phase I/II trial of ruxolitinib in combination with trastuzumab in  
1000 metastatic HER2 positive breast cancer. *Breast Cancer Res Treat* **189**, 177–185 (2021).
- 1001 80. O’Shaughnessy, J. *et al.* A randomized, double-blind, phase 2 study of ruxolitinib  
1002 or placebo in combination with capecitabine in patients with advanced HER2-negative  
1003 breast cancer and elevated C-reactive protein, a marker of systemic inflammation. *Breast*  
1004 *Cancer Res Treat* **170**, 547–557 (2018).

- 1005 81. Lan, Q. *et al.* Type I interferon/IRF7 axis instigates chemotherapy-induced  
1006 immunological dormancy in breast cancer. *Oncogene* **38**, 2814–2829 (2019).
- 1007 82. FASTQC. A quality control tool for high throughput sequence data | BibSonomy.  
1008 <https://www.bibsonomy.org/bibtex/f230a919c34360709aa298734d63dca3>.
- 1009 83. Ewels, P., Magnusson, M., Lundin, S. & Källér, M. MultiQC: summarize analysis  
1010 results for multiple tools and samples in a single report. *Bioinformatics* **32**, 3047–3048  
1011 (2016).
- 1012 84. Bolger, A. M., Lohse, M. & Usadel, B. Trimmomatic: a flexible trimmer for Illumina  
1013 sequence data. *Bioinformatics* **30**, 2114–2120 (2014).
- 1014 85. Kopylova, E., Noé, L. & Touzet, H. SortMeRNA: fast and accurate filtering of  
1015 ribosomal RNAs in metatranscriptomic data. *Bioinforma. Oxf. Engl.* **28**, 3211–3217  
1016 (2012).
- 1017 86. Anders, S., Pyl, P. T. & Huber, W. HTSeq—a Python framework to work with high-  
1018 throughput sequencing data. *Bioinformatics* **31**, 166–169 (2015).
- 1019 87. Patro, R., Duggal, G., Love, M. I., Irizarry, R. A. & Kingsford, C. Salmon provides  
1020 fast and bias-aware quantification of transcript expression. *Nat. Methods* **14**, 417–419  
1021 (2017).
- 1022 88. <https://www.r-project.org/>.
- 1023 89. Love, M. I., Huber, W. & Anders, S. Moderated estimation of fold change and  
1024 dispersion for RNA-seq data with DESeq2. *Genome Biol.* **15**, 550 (2014).
- 1025 90. Hänzelmann, S., Castelo, R. & Guinney, J. GSEA: gene set variation analysis for  
1026 microarray and RNA-Seq data. *BMC Bioinformatics* **14**, 7 (2013).
- 1027 91. Morgan M, Falcon S, Gentleman R. GSEABase: Gene set enrichment data  
1028 structures and methods. R package version 1.58.0. (2022).
- 1029 92. Subramanian, A. *et al.* Gene set enrichment analysis: A knowledge-based  
1030 approach for interpreting genome-wide expression profiles. *Proc. Natl. Acad. Sci.* **102**,  
1031 15545–15550 (2005).
- 1032 93. Ritchie, M. E. *et al.* limma powers differential expression analyses for RNA-  
1033 sequencing and microarray studies. *Nucleic Acids Res.* **43**, e47 (2015).
- 1034 94. Kolde, R. Pheatmap: pretty heatmaps. *R Package Version* **1**, 726 (2012).
- 1035 95. Dusa, Adrian. Draw Venn Diagrams R package venn. (2016).
- 1036 96. Wickham, H. *et al.* Welcome to the Tidyverse. *J. Open Source Softw.* **4**, 1686  
1037 (2019).
- 1038 97. Wickham, H. *ggplot2*. (Springer, 2009). doi:10.1007/978-0-387-98141-3.



- 1039 98. Gu, Z., Gu, L., Eils, R., Schlesner, M. & Brors, B. circlize Implements and  
1040 enhances circular visualization in R. *Bioinforma. Oxf. Engl.* **30**, 2811–2812 (2014).
- 1041 99. Durinck, S. *et al.* BioMart and Bioconductor: a powerful link between biological  
1042 databases and microarray data analysis. *Bioinforma. Oxf. Engl.* **21**, 3439–3440 (2005).
- 1043 100. Durinck, S., Spellman, P. T., Birney, E. & Huber, W. Mapping identifiers for the  
1044 integration of genomic datasets with the R/Bioconductor package biomaRt. *Nat. Protoc.*  
1045 **4**, 1184–1191 (2009).
- 1046 101. Neuwirth, E. RColorBrewer: ColorBrewer Palettes. 5.
- 1047 102. Wu, T. *et al.* clusterProfiler 4.0: A universal enrichment tool for interpreting omics  
1048 data. *Innov. Camb. Mass* **2**, 100141 (2021).
- 1049 103. Yu, G., Wang, L.-G., Han, Y. & He, Q.-Y. clusterProfiler: an R package for  
1050 comparing biological themes among gene clusters. *Omics J. Integr. Biol.* **16**, 284–287  
1051 (2012).
- 1052 104. Yu, G. & Hu, E. enrichplot: Visualization of Functional Enrichment Result. (2022)  
1053 doi:10.18129/B9.bioc.enrichplot.
- 1054 105. Xu, S. *et al.* Use ggbreak to Effectively Utilize Plotting Space to Deal With Large  
1055 Datasets and Outliers. *Front. Genet.* **12**, 774846 (2021).
- 1056 106. Monnier, Y. *et al.* CYR61 and alphaVbeta5 integrin cooperate to promote invasion  
1057 and metastasis of tumors growing in preirradiated stroma. *Cancer Res.* **68**, 7323–7331  
1058 (2008).
- 1059 107. Kassambara, A. ggpubr: ‘ggplot2’ Based Publication Ready Plots. (2020).
- 1060 108. Stuart, T. *et al.* Comprehensive Integration of Single-Cell Data. *Cell* **177**, 1888-  
1061 1902.e21 (2019).
- 1062 109. Gu, Z., Eils, R. & Schlesner, M. Complex heatmaps reveal patterns and  
1063 correlations in multidimensional genomic data. *Bioinforma. Oxf. Engl.* **32**, 2847–2849  
1064 (2016).
- 1065 110. Shao, X. *et al.* CellTalkDB: a manually curated database of ligand–receptor  
1066 interactions in humans and mice. *Brief. Bioinform.* **22**, bbaa269 (2021).
- 1067 111. Cabello-Aguilar, S. *et al.* SingleCellSignalR: inference of intercellular networks  
1068 from single-cell transcriptomics. *Nucleic Acids Res.* **48**, e55 (2020).
- 1069 112. Trapnell, C. *et al.* The dynamics and regulators of cell fate decisions are revealed  
1070 by pseudotemporal ordering of single cells. *Nat. Biotechnol.* **32**, 381–386 (2014).
- 1071 113. Qiu, X. *et al.* Reversed graph embedding resolves complex single-cell trajectories.  
1072 *Nat. Methods* **14**, 979–982 (2017).

- 1073 114. Cao, J. *et al.* The single-cell transcriptional landscape of mammalian  
1074 organogenesis. *Nature* **566**, 496–502 (2019).
- 1075 115. McInnes, L., Healy, J. & Melville, J. UMAP: Uniform Manifold Approximation and  
1076 Projection for Dimension Reduction. Preprint at <http://arxiv.org/abs/1802.03426> (2020).
- 1077 116. Korotkevich, G. *et al.* Fast gene set enrichment analysis. 060012 Preprint at  
1078 <https://doi.org/10.1101/060012> (2021).
- 1079 117. Gao, W. *et al.* IL20RA signaling enhances stemness and promotes the formation  
1080 of an immunosuppressive microenvironment in breast cancer. *Theranostics* **11**, 2564–  
1081 2580 (2021).
- 1082 118. Cerami, E. *et al.* The cBio cancer genomics portal: an open platform for exploring  
1083 multidimensional cancer genomics data. *Cancer Discov.* **2**, 401–404 (2012).
- 1084 119. Ramos, M. *et al.* Multiomic Integration of Public Oncology Databases in  
1085 Bioconductor. *JCO Clin. Cancer Inform.* 958–971 (2020) doi:10.1200/CCI.19.00119.
- 1086 120. Therneau, T. M. & Grambsch, P. M. *Modeling Survival Data: Extending the Cox*  
1087 *Model.* (Springer, 2000). doi:10.1007/978-1-4757-3294-8.

1088

## 1089 **Acknowledgments**

1090 The authors wish to thank Sarah Cattin and Melissa Rizzo for assistance with FACS  
1091 analysis, Dr. Ana-Marija Sulić (Institute of Biotechnology, HiLIFE, University of Helsinki) for  
1092 the insightful discussion about scRNA-seq data analysis, Dr. Fred R. Miller (Michigan  
1093 Cancer Foundation, Detroit, MI, USA) for providing 4T1 cells, Dr. Khalil Zaman (Department  
1094 of Oncology, University Hospital, University of Lausanne, Lausanne, Switzerland) for  
1095 providing chemotherapeutic drugs. This work was supported by grants from the Swiss  
1096 National Science Foundation (31003A\_179248; 310030\_208136), the Swiss Cancer  
1097 League (KFS 4400-02-2018) and the Medic Foundation (to C.R.).

1098

## 1099 **Author contributions**

1100 Conceptualization, S.P., Q.L., C.R.; Methodology, S.P., N.F., Q.L., C.R.; Software,  
1101 A.K., N.F., Q.L.; Validation, S.P., M.B., A.K., Q.L.; Formal analysis, S.P., M.B., A.K., Q.L.;

1102 Investigation, S.P., M.B., A.K., O.C., Y-T.H., N.D., L.G., Q.L.; Resources, S.P., M.B., A.K.,  
1103 O.C., N.D., L.G., G.L.; Data Curation, S.P., M.B., A.K., N.D., Q.L., C.R.; Writing – original  
1104 draft preparation, S.P., Q.L., C.R.; Writing – review and editing, S.P., M.B., A.K., Y-T.H.,  
1105 G.L., N.D., Q.L., C.R.; Visualization, S.P., M.B., A.K., Q.L., C.R.; Supervision, S.P., Q.L.,  
1106 C.R.; Project administration, Q.L., C.R.; Funding acquisition, C.R.

1107

### 1108 **Competing interests**

1109 The authors have no conflicts of interest to declare.

**Sca1 (Ross dataset)**

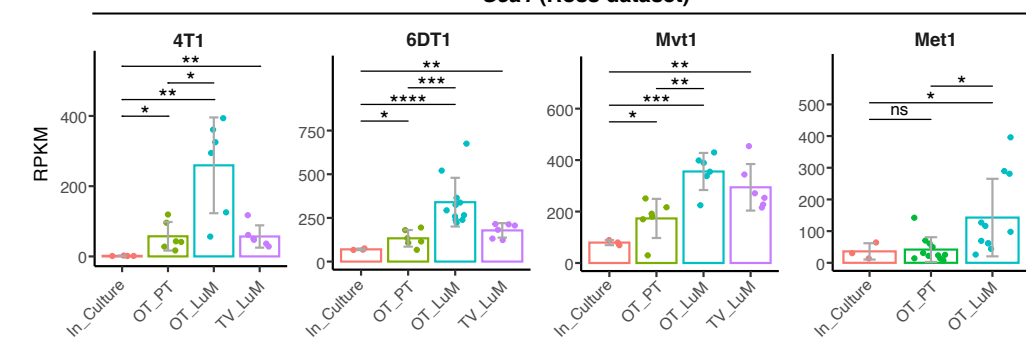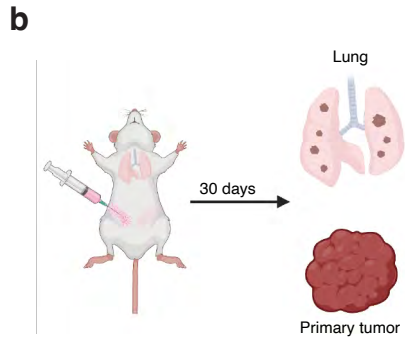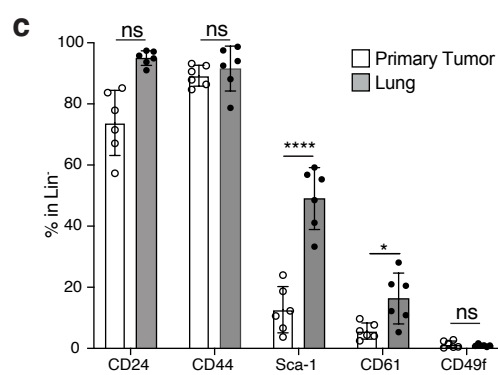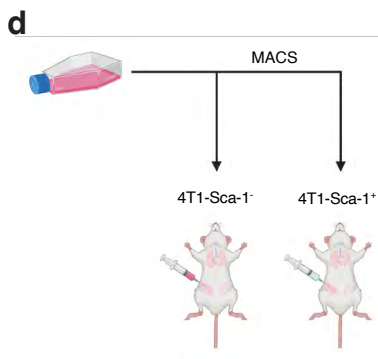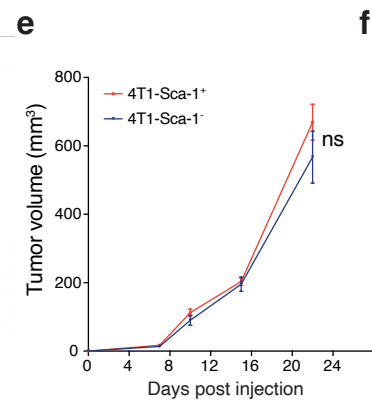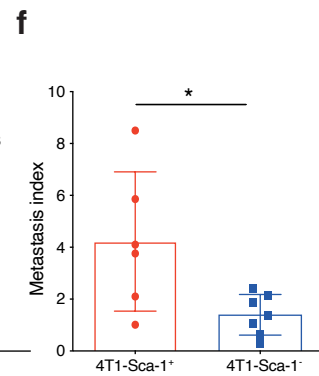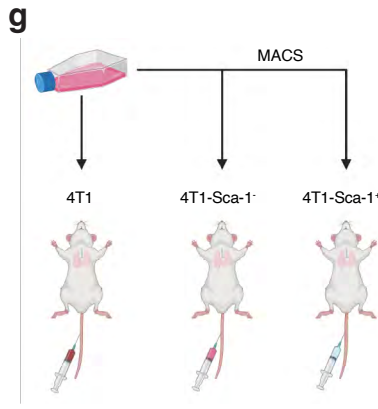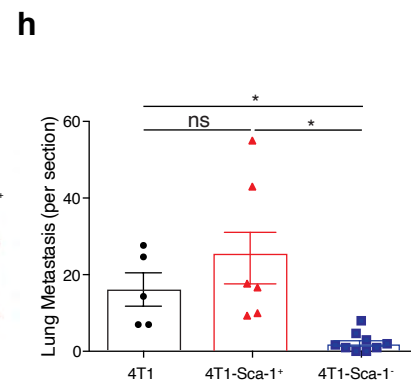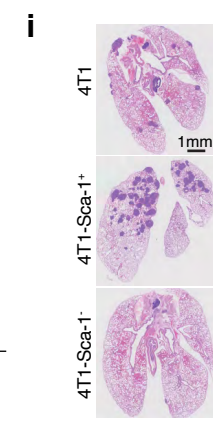

Figure 1

## **Figure 1. Sca-1<sup>+</sup> population is enriched during *in vivo* metastasis across multiple breast cancer models**

**(a)** Sca-1 mRNA expression in the metastatic murine breast cancer models 4T1, 6DT1, Mvt1 and Met1, extracted from the Ross dataset. Analyzed samples consist of cultured cells (In\_Culture), orthotopic injected primary tumors (OP\_PT), spontaneous lung metastases (OP\_LuM) and lung metastases induced by tail-vein injection (TV\_LuM). Data are presented as mean of Reads Per Kilobase of transcript per Million mapped reads (RPKM)  $\pm$  SD (unpaired two-tailed student's t test with Bonferroni correction).

**(b)** Experimental set up for *in vivo* experimental validation. The 4T1 tumor cells were orthotopically injected into the 4<sup>th</sup> mammary fat pad. Thirty days later, cells from primary tumors and lungs were isolated to examine CSC marker expression by flow cytometry.

**(c)** Frequency of CSC marker expression in primary tumors and lung metastases. Results give the percentage of CD24, CD44, Sca-1, CD61 and CD49f positive cells gated in lineage negative cells (CD45<sup>-</sup>CD31<sup>-</sup>TER119<sup>-</sup>).

**(d-f)** Experimental set up **(d)** of the *in vivo* experiment to assess tumor growth **(e)** and lung metastatic ability (metastatic index) **(f)** of 4T1-Sca-1<sup>+</sup> and 4T1-Sca-1<sup>-</sup> populations isolated from parental 4T1 cells orthotopically injected into the 4<sup>th</sup> mammary fat pad. Metastases are assessed 21 days after tumor cell injection. n=8/group, 3 independent experiments.

**(g-i)** Experimental set up **(g)** of the *in vivo* experiment to assess lung colonization capacity of sorted parental 4T1, 4T1-Sca-1<sup>+</sup> and 4T1-Sca-1<sup>-</sup> cells by tail-vein injection. Lung metastatic nodule numbers **(h)** and representative images **(i)** of lungs from mice 10 days post injection (n=5-6, 2 independent experiments). Scale bar=1 mm. Data are

represented as mean values  $\pm$  SEM (unpaired two-tailed student's t test). P values: \*,  $p < 0.05$ ; \*\*,  $p < 0.01$ ; \*\*\*,  $p < 0.001$ ; \*\*\*\*,  $p < 0.0001$ ; ns, non-significant.

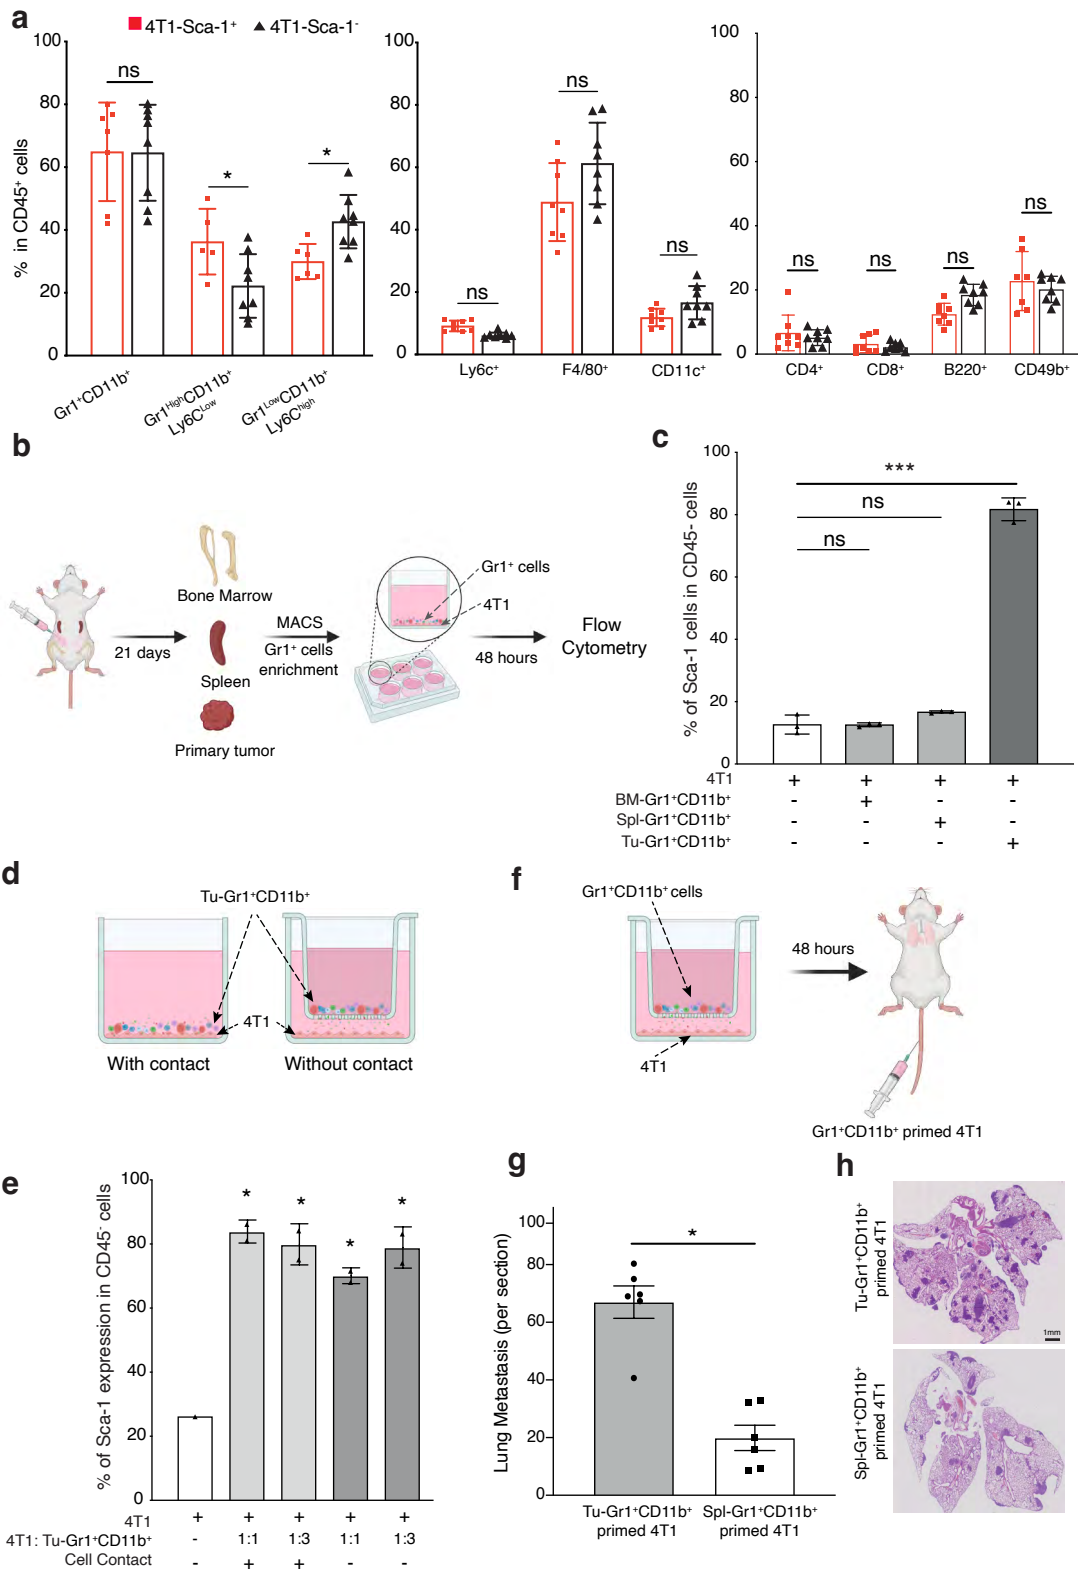

Figure 2



## Figure 2. Sca-1 expression is modulated by the tumor microenvironment

**(a)** Frequency of different immune cell populations in primary tumors of mice orthotopically injected with 4T1-Sca-1<sup>+</sup> and 4T1-Sca-1<sup>-</sup> 21 days post injection. Populations are determined in CD45 negative, viable cells.

**(b-c)** Illustrative scheme **(b)** showing the experimental design for isolating Gr1<sup>+</sup> cells from different sites of tumor-bearing mice. Twenty-one days after tumor implantation, Gr1<sup>+</sup> cells were isolated from bone marrow (BM-Gr1<sup>+</sup>CD11b<sup>+</sup>), spleen (Spl-Gr1<sup>+</sup>CD11b<sup>+</sup>) or primary tumor (Tu-Gr1<sup>+</sup>CD11b<sup>+</sup>) and co-cultured for 48 hours with parental 4T1 cells *in vitro*. Sca-1 expression in tumor cells was examined by flow cytometry **(c)**. Co-cultures conditions are indicated in the bar graph.

**(d)** Illustrative scheme of the experimental co-culture setup.

**(e)** MACS-enriched Gr1<sup>+</sup> cells were cocultured with 4T1 cells with or without Transwell inserts of 0.4  $\mu$ m pore size. The 4T1 cells were seeded in the bottom well and Gr1<sup>+</sup>CD11b<sup>+</sup> cells in the upper part of the insert. After 48 hours, 4T1 cells were examined for Sca1 expression by FACS. Co-cultures conditions are indicated in the bar graph. The ratio of tumor cells and Tu-Gr1<sup>+</sup>CD11b<sup>+</sup> is varied from 1:1 to 1:3. Significant enrichment of Sca-1<sup>+</sup> population were observed in all conditions.

**(f)** Illustrative scheme of the experimental metastasis setup.

**(g-h)** Evaluation of the metastatic capacity of Gr1<sup>+</sup>CD11b<sup>+</sup>-educated 4T1 cells *in vivo*. The 4T1 tumor cells were primed with Tu-Gr1<sup>+</sup>CD11b<sup>+</sup> or Spl-Gr1<sup>+</sup>CD11b<sup>+</sup> *in vitro* without cell-cell contact for 48 hours and injected into the tail vein of mice. Lung metastases were quantified 10 days after injection **(g)**, and representative images of lung sections are showed **(h)**. n=7, H&E staining, Scale bar=1mm.

Data are represented as mean values  $\pm$  SEM. P values: \*, p<0.05; \*\*\*, p< 0.001 (unpaired two-tailed student's t test, and only significant data has been labeled).

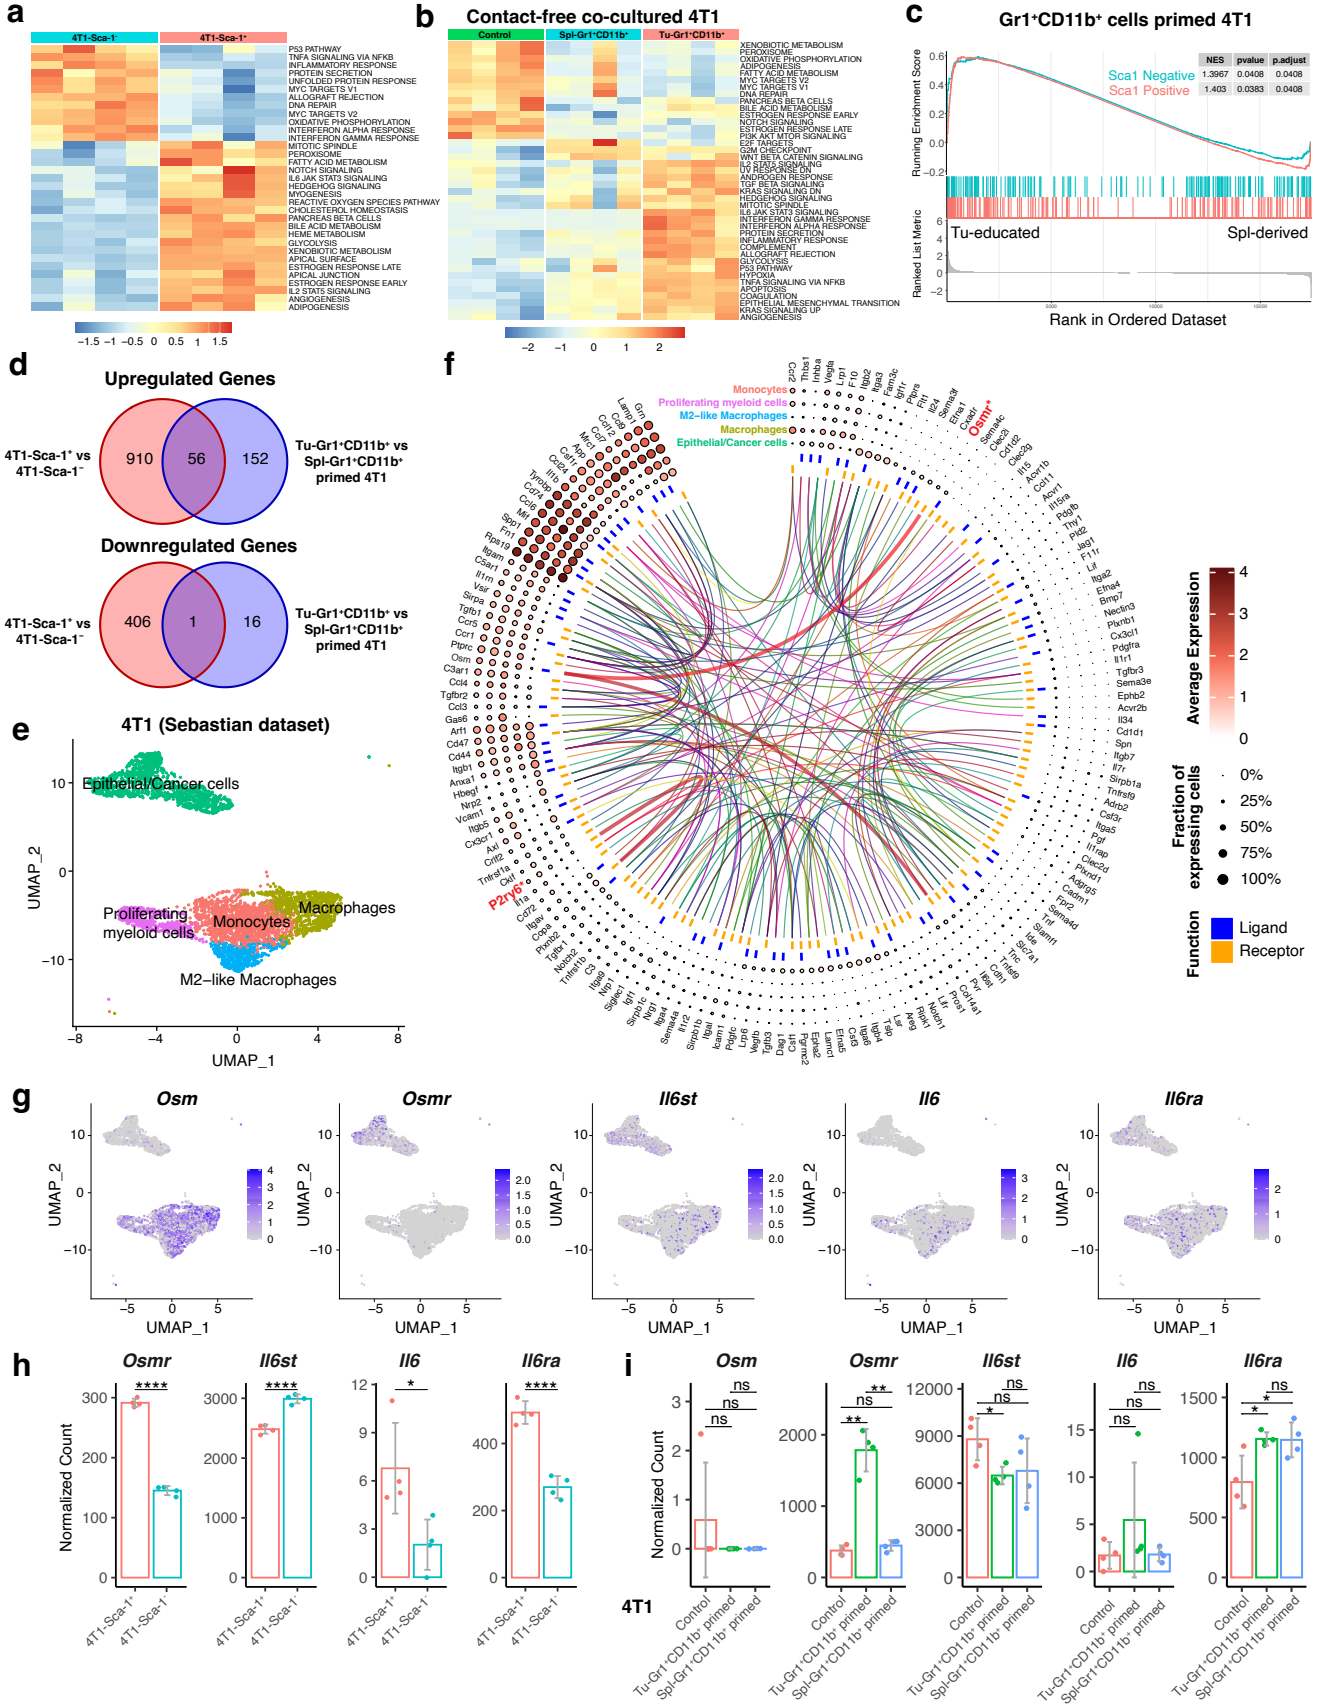

Figure 3

### Figure 3. Transcriptomic analysis of Sca-1<sup>+</sup> tumor cells

**(a)** Heatmap showing the signature score of the hallmark pathways analysis in 4T1-Sca-1<sup>+</sup> and 4T1-Sca-1<sup>-</sup> population sorted from parental 4T1 cells. The colors code the expression levels relative to average levels as indicate at the bottom.

**(b)** Heatmap showing the signature score of the hallmarks pathway analysis in parental 4T1 (4T1), Spl-Gr1<sup>+</sup>CD11b<sup>+</sup> primed 4T1 and Tu-Gr1<sup>+</sup>CD11b<sup>+</sup> primed 4T1 cells. The colors code the expression levels relative to average levels as indicate at the bottom.

**(c)** Gene set enrichment analysis (GSEA) comparing the Tu-Gr1<sup>+</sup>CD11b<sup>+</sup> and Spl-Gr1<sup>+</sup>CD11b<sup>+</sup> primed 4T1 cells. GSEA shows positive correlations of both Sca1 Positive and Sca1 Negative signatures. NES, normalized enrichment score.

**(d)** Venn diagrams showing that 56 upregulated genes, and 1 downregulated gene are shared between endogenous and Tu-Gr1<sup>+</sup>CD11b<sup>+</sup> induced Sca-1<sup>+</sup> population in 4T1 tumor cells.

**(e)** UMAP plot showing clusters of cancer cells and myeloid cell populations in orthotopically growing 4T1-derived primary tumors extracted from the Sebastian dataset (see Materials and Methods for details)-

**(f)** Circos diagram showing the potential interactions between cancer cells and different myeloid cell populations determined by CellPhoneDB (see Materials and Methods for details) based on the Sebastian dataset. Only OSMR and P2RY6 are shared with the common 56 gene list showed in panel **d**.

**(g)** UMAP plot showing the gene expression pattern of *Osm*, *Osmr*, *Il6st*, *Il6* and *Il6ra* in different cell populations in the Sebastian dataset.

**(h-i)** mRNA expression of *Osm*, *Osmr*, *Il6st*, *Il6* and *Il6ra* based on RNAseq data used to generate the heatmaps shown in **a** & **b**, respectively. *Osm* expression is not detected in sorted 4T1 cells. Data are presented as mean of normalized count  $\pm$  SD. P values:

,  $p < 0.05$ ; \*\*,  $p < 0.01$ ; \*\*\*,  $p < 0.001$ ; \*\*\*\*,  $p < 0.0001$ ; ns, non-significant (unpaired two-tailed student's t test, and with Bonferroni correction for Gr1<sup>+</sup>CD11b<sup>+</sup> cells-educated 4T1 cells).

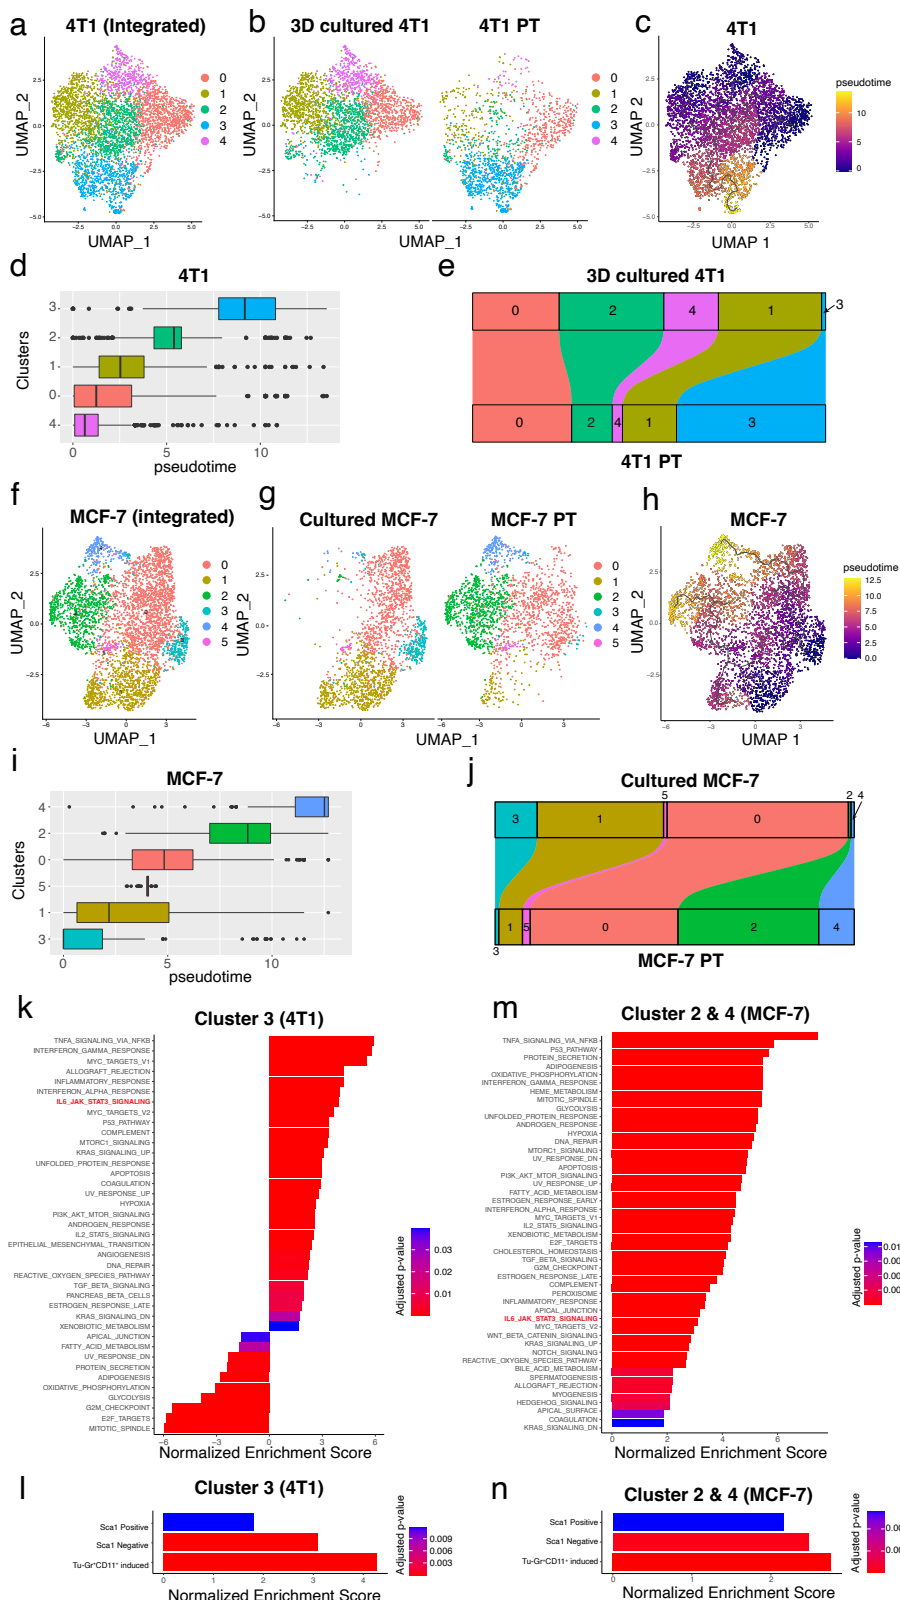

Figure 4

#### **Figure 4. Transformation dynamics of tumor cell populations induced by the tumor microenvironment**

**(a)** UMAP plots showing 4T1 clusters based on integrated scRNA-seq data from 4T1 cells in 3D culture or in primary tumor.

**(b)** Distribution of specific clusters in 4T1 cells in 3D culture or in primary tumor (PT).

**(c-d)** UMAP plot **(c)** and boxplot **(d)** showing the clusters in pseudo-time during the transformation of 4T1 cells from *ex vivo* culture to *in vivo*.

**(e)** Sankey diagram showing the dynamic of each cluster during the transformation of 4T1 cells from *ex vivo* culture to *in vivo*. Cluster 3 was largely expanded *in vivo*.

**(f)** UMAP plots showing MCF-7 clusters based on integrated scRNA-seq data from MCF-7 cells in culture or in primary tumor.

**(g)** Distribution of the specific clusters in cultured MCF7 cells or in MCF7 primary tumors (PT).

**(h-i)** UMAP plot **(h)** and boxplot **(i)** showing the clusters in pseudo-time during the transformation of MCF-7 cells from *ex vivo* culture to *in vivo*.

**(e)** Sankey diagram showing the dynamic of each cluster during the transformation of MCF-7 cells from *ex vivo* culture to *in vivo*. Cluster 2 and 4 were largely expanded *in vivo*.

**(k-l)** GESA analysis of Hallmark gene sets **(k)** and Sca1 Positive signature, Sca1 Negative Signature and Tu-Gr1<sup>+</sup>CD11b<sup>+</sup> induced signature **(l)** of cluster 3 in 4T1 data. Only the signatures with adjusted p-value <0.05 were shown.

**(m-n)** GESA analysis of Hallmark gene sets **(m)** and Sca1 Positive signature, Sca1 Negative Signature and Tu-Gr1<sup>+</sup>CD11b<sup>+</sup> induced signature **(n)** of cells in cluster 2 or cluster 4 in MCF-7 data. Only the signatures with adjusted p-value <0.05 were shown.

Analyses are based on publicly available data (4T1: GSM4812003 and GSM3502134;  
MCF-7: GSM4681765 and GSM5904917).



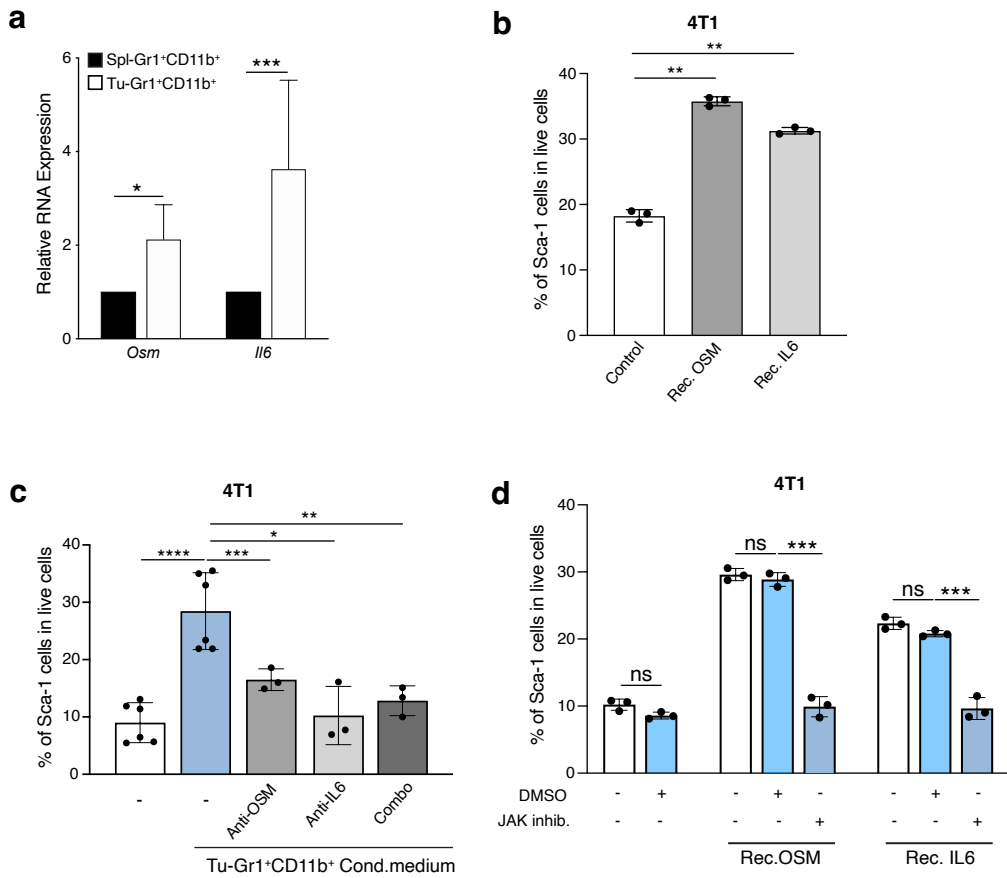

Figure 5

## **Figure 5. Sca-1<sup>+</sup> population is modulated by the OSM/IL6-JAK pathway**

**(a)** Quantitative PCR analysis of *Osm* and *Il6* mRNA expression in Tu-Gr1<sup>+</sup>CD11b<sup>+</sup> and Spl- Gr1<sup>+</sup>CD11b<sup>+</sup>. Tu-Gr1<sup>+</sup>CD11b<sup>+</sup> express significantly higher *Osm* and *Il6* levels compared with Spl-Gr1<sup>+</sup>CD11b<sup>+</sup>.

**(b)** Fraction of 4T1-Sca1<sup>+</sup> cells upon exposure to recombinant Il6 or Osm protein (1 µg/ml for 48 hours) as determined by flow cytometry. Both cytokines induced the Sca-1<sup>+</sup> population in cultured 4T1 tumor cells.

**(c)** Inhibition of OSM and IL6 from Tu-Gr1<sup>+</sup>CD11b<sup>+</sup> conditioned medium with anti- OSM or anti-IL6 neutralizing antibody as indicated. Treatment with either antibody significantly suppressed the Sca-1<sup>+</sup> population enrichment.

**(d)** Treatment with the JAK inhibitor Ruxolitinib (5 µM) of cultured 4T1 cells stimulated with recombinant IL6 or OSM protein (1 µg/ml, 48 hours exposure) as indicated. Ruxolitinib inhibited Sca-1<sup>+</sup> population enrichment induced by recombinant IL6 or OSM protein.

Data are represented as mean ± SEM. \*, p<0.05; \*\*, p< 0.01; \*\*\*, p< 0.001; \*\*\*\*, p< 0.0001; ns, non-significant (unpaired two-tailed student's t test, and only significant data has been labeled).

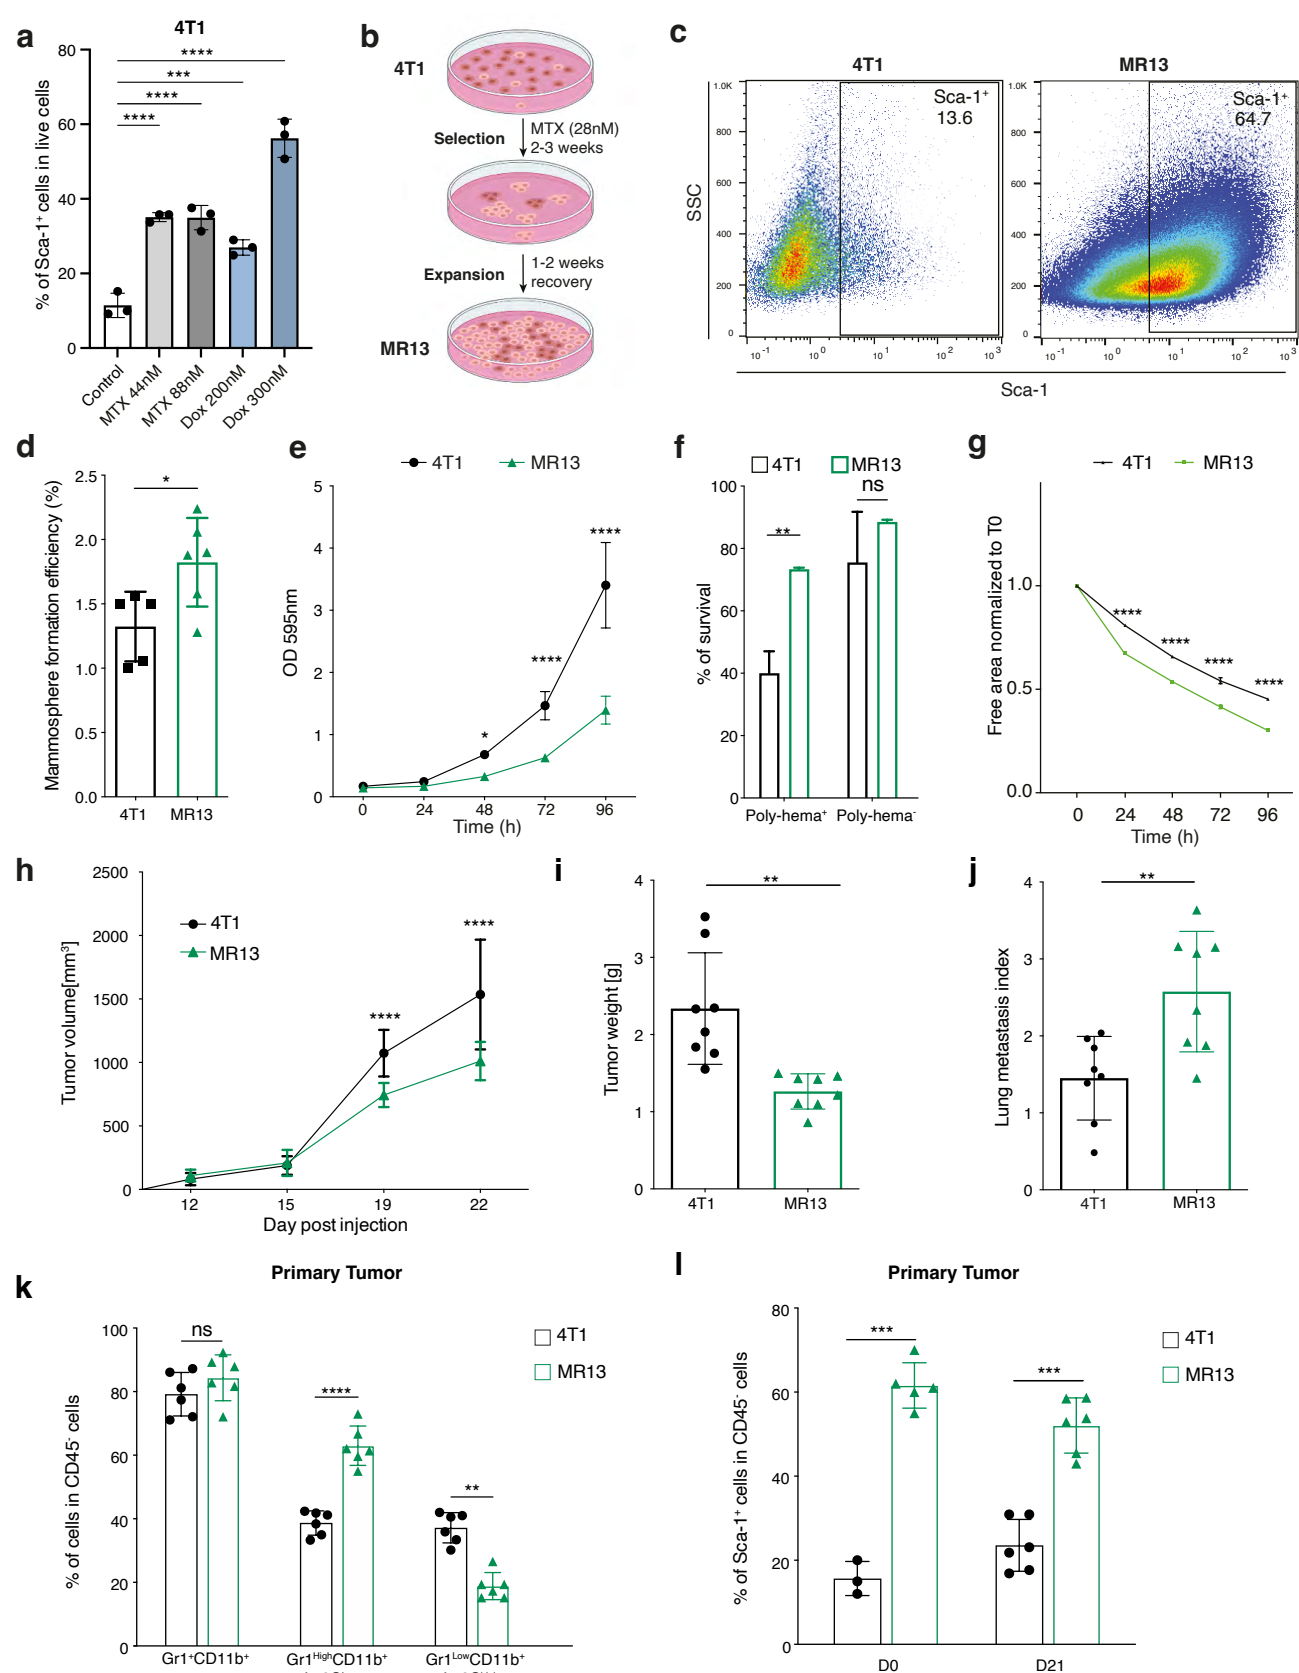

Figure 6

**Figure 6. Long term chemotherapy treatment of 4T1 cells induces a stable Sca-1<sup>+</sup> population (MR13) with higher metastatic capacity and CSC features**

**(a)** Fraction of 4T1-Sca1<sup>+</sup> cells upon short-term (48 hours) Methotrexate (44 and 88 nM) and Doxorubicin (200 and 300 nM) treatments. All treatments induced enrichment of Sca-1<sup>+</sup> population.

**(b)** Illustrative scheme of the experimental design to obtain chemotherapy resistant MR13 cells from 4T1.

**(c)** Dot plots representing Sca-1 expression vs SSC determined by flow cytometry in MR13 chemotherapy resistant cells vs parental 4T1 tumor cells *in vitro*.

**(d)** Quantification of the mammosphere forming efficiency of 4T1 and MR13 tumor cells.

**(e)** Cell proliferation curve of 4T1 and MR13 tumor cells *in vitro* determined by crystal violet assay. The results are presented as mean of optical density (OD).

**(f)** Anchorage free survival of 4T1 and MR13 tumor cells given in % of surviving cells.

**(g)** Cell motility of 4T1 and MR13 tumor cells determined by a scratch wound healing assay. n=5-6/group. Results are presented as cell-free area relative to the initial wound area from 3 independent experiments.

**(h)** Growth curves of primary tumors in BALB/c mice orthotopically injected with 4T1 and MR13 tumor cells (n=10-11/group).

**(i)** Tumor weight of 4T1 and MR13 tumors recovered from BALB/c mice at day 22 post injection (n=8-9/group).

**(j)** Lung metastasis index 23 days post injection. The number of metastatic nodules is determined by H&E staining and normalized based on the primary tumor weight (n=8-9/group).

**(k)** Frequency of different CD11b<sup>+</sup> myeloid cells subpopulations in primary tumors from MR13 and 4T1 injected mice determined by flow cytometry 21-days post injection (n=6). Subpopulations are determined in CD45 positive, viable cell population.

**(l)** Percentage of Sca-1<sup>+</sup> tumor cells at time of injections (D0) of 4T1 and MR13 cells and in primary tumors recovered at day 21 (D21). Sca-1 expression is determined in CD45 negative, viable cell population.

Data are represented as mean values  $\pm$  SEM. \*, p<0.05; \*\*, p<0.005; \*\*\*, p< 0.001, \*\*\*\*, p< 0.0001 unpaired two-tailed student's t test, and only significant data has been labeled. In e, g, h, results were analyzed by two-way ANOVA with Tukey's multiple comparison test.

**a**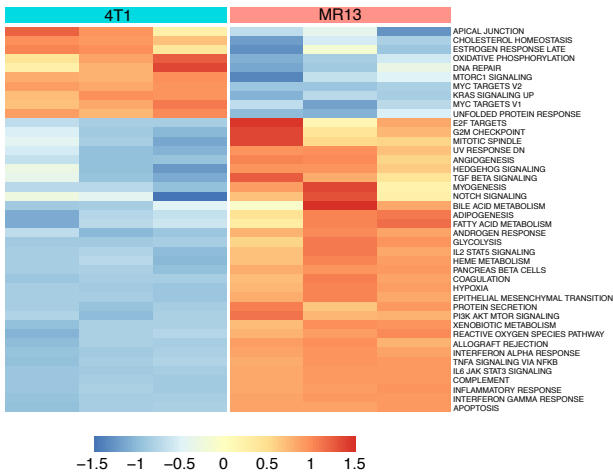**b**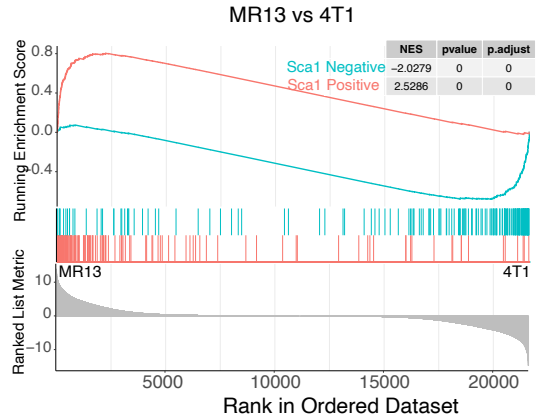**c**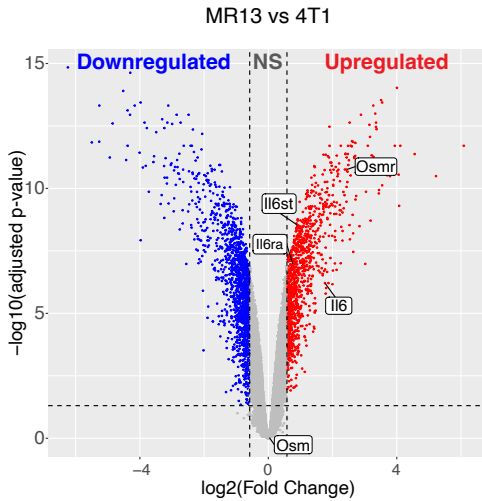**d**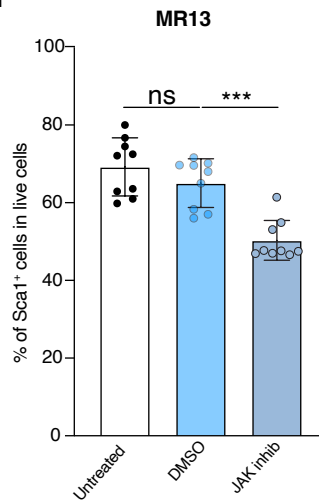**e**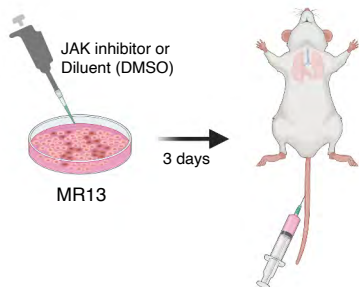**f**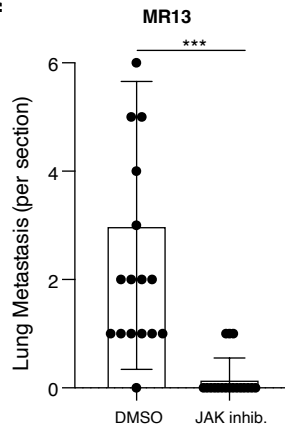

Figure 7

## **Figure 7. IL6-JAK pathway promotes Sca-1<sup>+</sup> persistence and metastatic capacity in chemotherapy resistant MR13 tumor cells**

**(a-b)** Gene expression analysis of parental 4T1 and chemotherapy resistant MR13 cells. Heat map represents the signature score of the hallmark pathways analysis. Results from 3 biological replicates are shown **(a)**. GSEA results showing that MR13 cells are positively enriched with for the Sca-1 Positive signature and negatively with for the Sca-1 Negative signature **(b)**.

**(c)** Volcano plot showing the differential expression of *Osm*, *Osmr*, *Il6st*, *Il6* and *Il6ra* mRNA in MR13 vs 4T1 tumor cells.

**(d)** Fraction of Sca-1<sup>+</sup> population in MR13 tumor cells treated for 48 hours with Ruxolitinib (5  $\mu$ M) relative to vehicle control (DMSO) treatment.

**(e)** Illustrative scheme of the experimental design for testing the effect of Ruxolitinib on MR13 metastatic capacity shown in **f**. MR13 tumor cells were treated with Ruxolitinib or DMSO *in vitro* for 72 hours and then injected into the mice tail vein. Lungs were examined for metastasis 10 days after tumor cell injection.

**(f)** Number of metastatic nodules in the lungs from mice injected with MR13 treated *in vitro* with Ruxolitinib or DMSO and indicated (n=8).

Data are represented as mean values  $\pm$  SEM. P values: ns, non-significant, \*\*\* < 0.001, (unpaired two-tailed student's t test, and with Bonferroni correction for d)



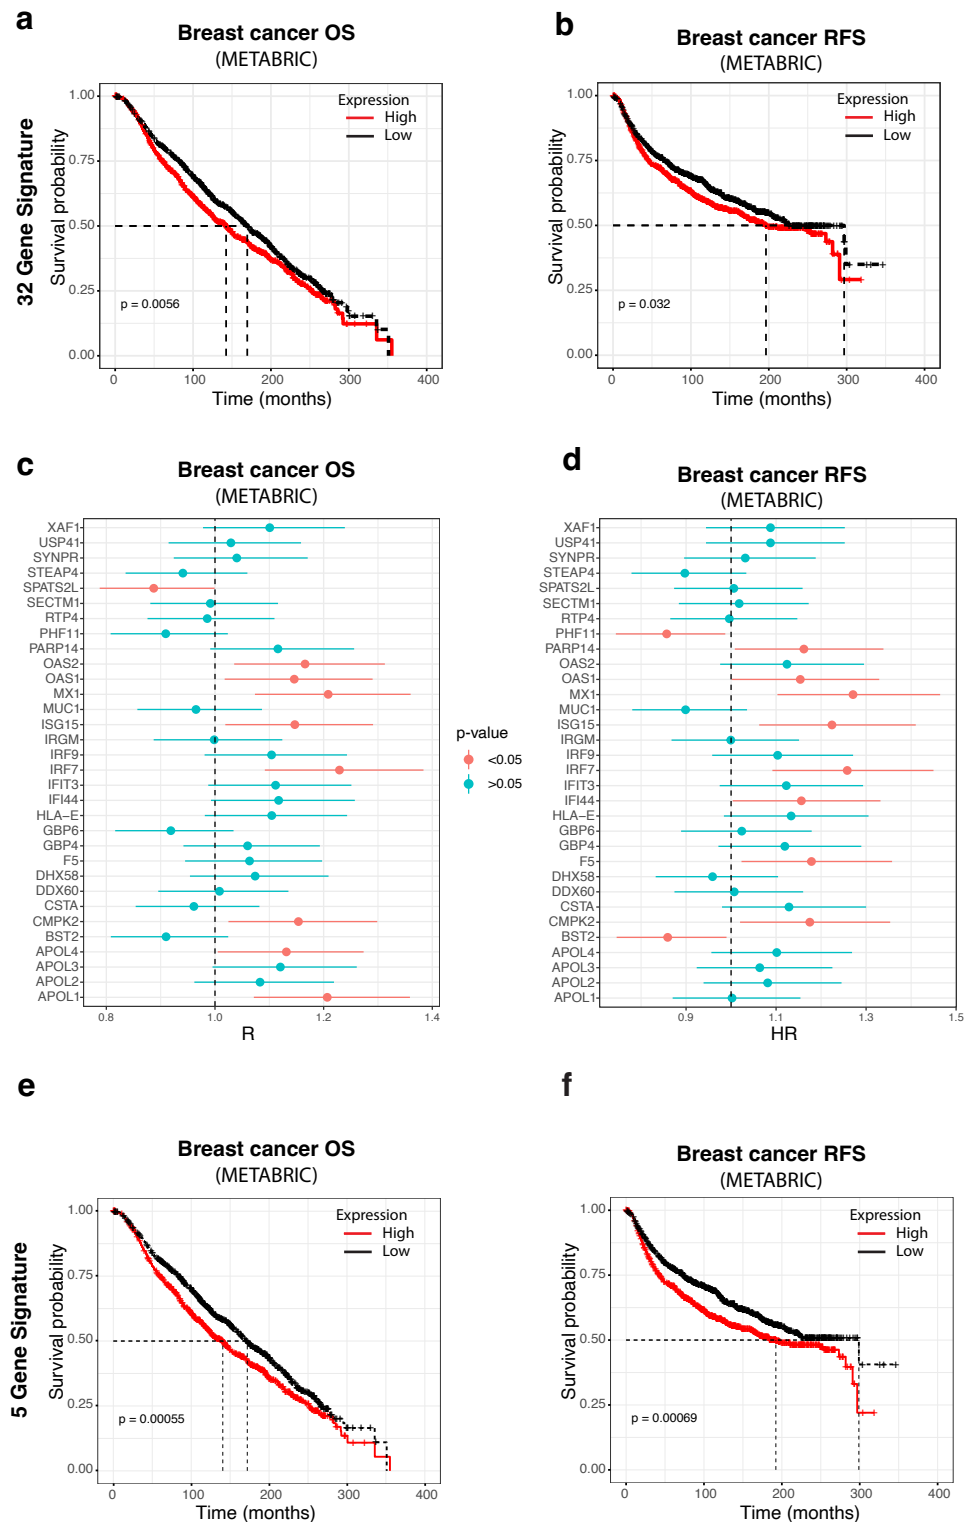

Figure 8

**Figure 8. Tu-Gr1<sup>+</sup>CD11b<sup>+</sup>-induced tumor cell signature predicts worse outcome in breast cancer patients**

**(a-b)** Kaplan-Meier curves showing overall survival (OS) **(a)** or relapse-free survival (RFS) **(b)** for breast cancer patients according to high or low expression of an orthologue 32 gene signature, based on the Tu-Gr1<sup>+</sup>CD11b<sup>+</sup> -induced 4T1 cell signature, in the METABRIC datasets. The p-value was calculated using the log-rank test and high and low expression levels were stratified by median values.

**(c-d)** Forest plots showing the Cox proportional hazard regression (HR) for OS **(c)** and RFS **(d)** of the individual 32 orthologues of the Tu-Gr1<sup>+</sup>CD11b<sup>+</sup>-induced signature, based on gene expression in tumor samples from METABRIC dataset.

**(e-f)** Kaplan-Meier curves showing OS **(e)** and RFS **(f)** according to the reduced 5 orthologue gene signature. expression in the METABRIC datasets.

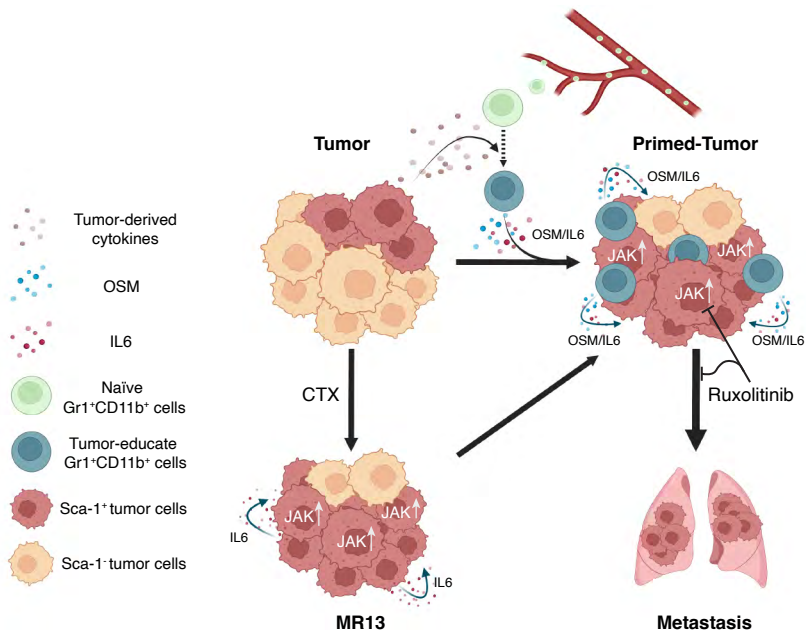

Figure 9

**Figure 9 Illustrative scheme of the proposed model for cancer cell plasticity modulated by OSM/IL6 during tumor progression and chemotherapy**

Parental tumor cells maintain a small portion of highly metastatic Sca-1<sup>+</sup> population. During tumor progression, naïve Gr1<sup>+</sup>CD11b<sup>+</sup> are recruited to the TME and educated into Tu-Gr1<sup>+</sup>CD11b<sup>+</sup> by tumor-derived factors. In turn, Tu-Gr1<sup>+</sup>CD11b<sup>+</sup> secrete OSM and IL6 to convert Sca-1<sup>-</sup> population into a highly metastatic Sca-1<sup>+</sup> population. Chemotherapy (CTX) enriched for Sca-1<sup>+</sup> population due to its intrinsic resistance against cytotoxic treatment. Resistant cells express IL6 to maintain the high portion of Sca-1<sup>+</sup> population with high metastatic ability. JAK inhibitor Ruxolitinib suppresses the conversion to Sca-1<sup>+</sup> population and metastasis. Inhibition of OSM, IL6 and the activated downstream kinase JAK are candidate therapeutic targets to impinge on metastatic breast cancer progression during natural evolution and following therapy-resistance.

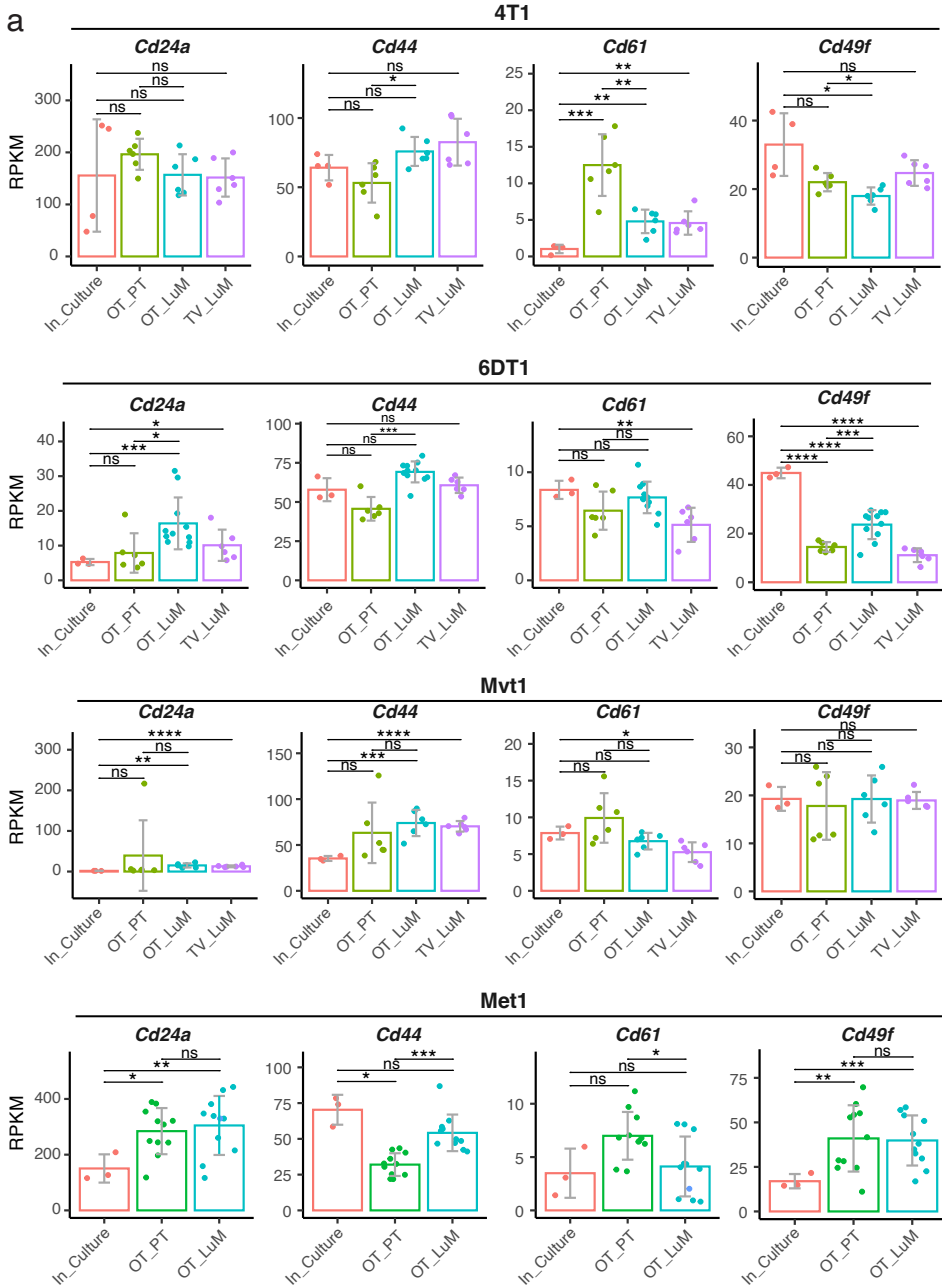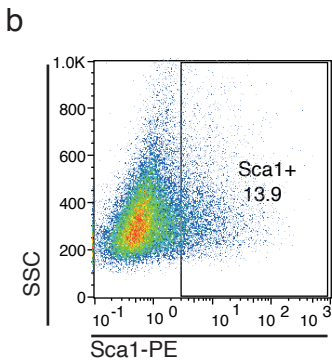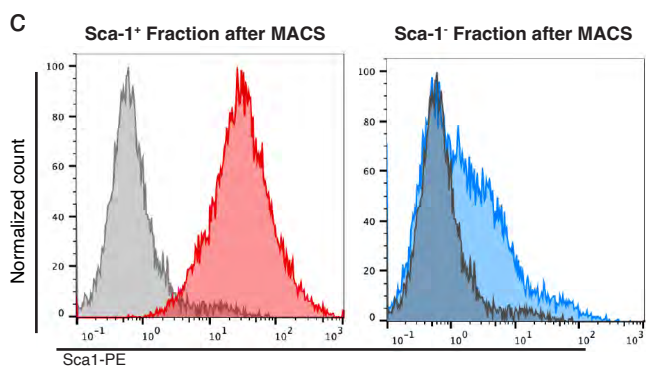

## **Supplementary Fig 1. Stem cell markers expression in multiple metastatic breast cancer models**

**(a)** Stem cell marker *Cd24a*, *Cd44*, *Cd61* and *Cd49e* mRNA expression in 4T1, 6DT1, Mvt1 and Met1 metastatic murine breast cancer models extracted from Ross dataset. Data are presented as mean values of RPKM  $\pm$  SD. \*,  $p < 0.05$ ; \*\*,  $p < 0.01$ ; \*\*\*,  $p < 0.001$ ; \*\*\*\*,  $p < 0.0001$ ; ns, non-significant (unpaired two-tailed student's t test).

**(b)** Dot plot representation of Sca-1 expression in 4T1 parental cell line determined by flow cytometry.

**(c)** Histogram of Sca-1 expression distribution on MACS positively selected Sca-1<sup>+</sup> cells (red histogram) and MACS negatively selected Sca-1<sup>-</sup> cell (blue histogram). Gray: histogram of fluorescence of unstained cells.

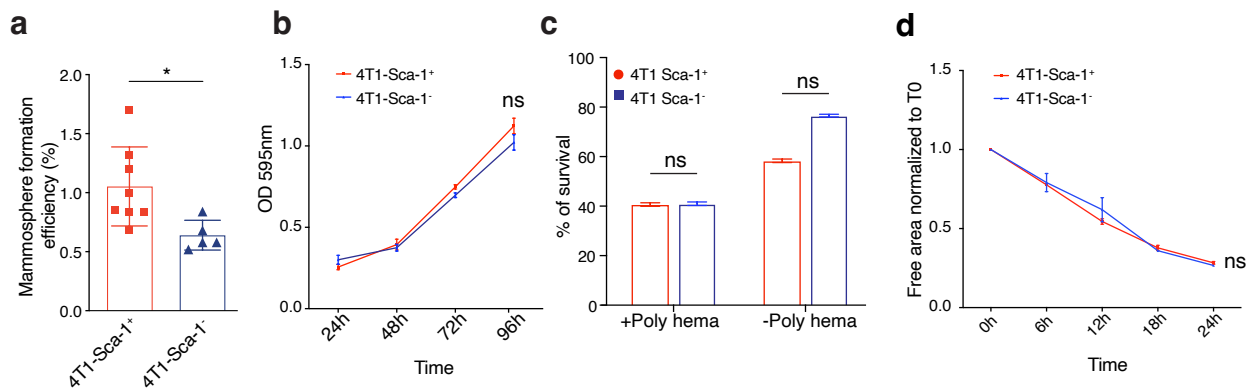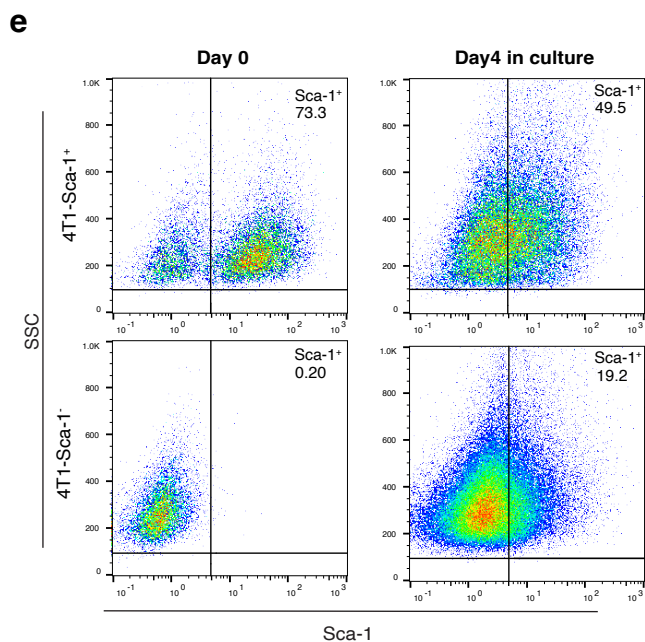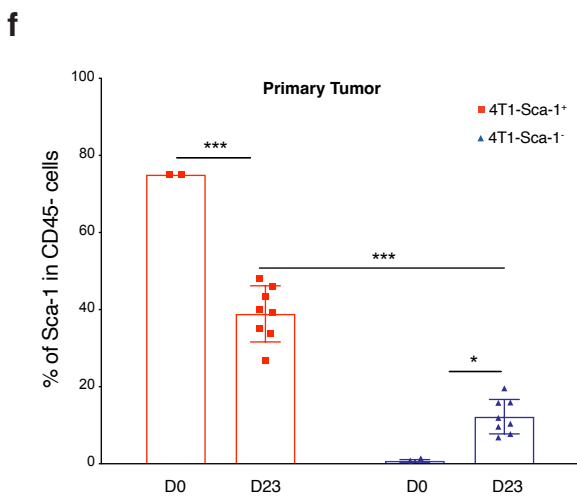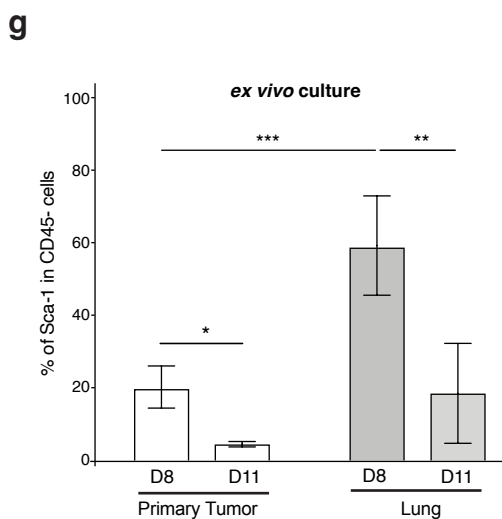

## **Supplementary Fig 2. Sca-1<sup>+</sup> tumor cells have stem cell-like features *in vitro* and show plasticity *in vivo* and *in vitro***

**(a)** Quantification of the mammosphere forming efficiency of 4T1-Sca-1<sup>+</sup> and 4T1-Sca-1<sup>-</sup> populations.

**(b)** Cell proliferation curve of 4T1-Sca-1<sup>+</sup> and 4T1-Sca-1<sup>-</sup> *in vitro* MACS isolated tumor cells determined by crystal violet assay. The results represent optical density (OD) of the wells.

**(c)** Anchorage-independent survival of 4T1-Sca-1<sup>+</sup> and 4T1-Sca-1<sup>-</sup> MACS isolated tumor cells determined with an anoikis assay. Cells were cultured in control or poly-hema coated wells (to avoid adhesion) and viability measured by annexin/PI staining and FACS analysis. The results are shown as % of viable cells identified as Annexin V negative and PI negative cells.

**(d)** Cell motility of 4T1-Sca-1<sup>+</sup> and 4T1-Sca-1<sup>-</sup> sorted tumor cells determined by a scratch wound healing assay (n=5-6/group). Results are given cell-free area relative to the initial wound area.

**(e)** The abundance of Sca-1<sup>+</sup> population after MACS isolation from parental 4T1 cells. Day 0: immediately after positive sorting, the Sca-1<sup>+</sup> population to accounts for 73.3% of total cells (upper panel). After 4 days of *in vitro* culture the abundance of the Sca-1<sup>+</sup> population decreased to 48.9%. Negatively sorted Sca-1<sup>-</sup> population accounts for >99 % of total cells (lower panel). After 4 days of *in vitro* culture 19.2% of the initially Sca-1<sup>+</sup> cells were Sca-1<sup>+</sup>.

**(f)** Abundance of Sca-1<sup>+</sup> population at the time of orthotopic injection of MACS isolated 4T1-Sca-1<sup>+</sup> and 4T1-Sca-1<sup>-</sup> cells into the mammary fat pad of BALB/C mice (D0) and in the derived primary tumors 23 days post injection (D23) as indicated. n=3-8/group.



**(g)** Abundance of the Sca-1<sup>+</sup> population in tumor cells recovered from primary tumors and lung metastases 21 days post orthotopic injection and further cultured for 8- and 11-days *ex vivo* as indicated.

Data represent mean values  $\pm$  SEM from 3 independent experiments. \*,  $p < 0.05$ ; \*\*,  $p < 0.01$ ; \*\*\*,  $p < 0.001$ ; (unpaired two-tailed student's t test).

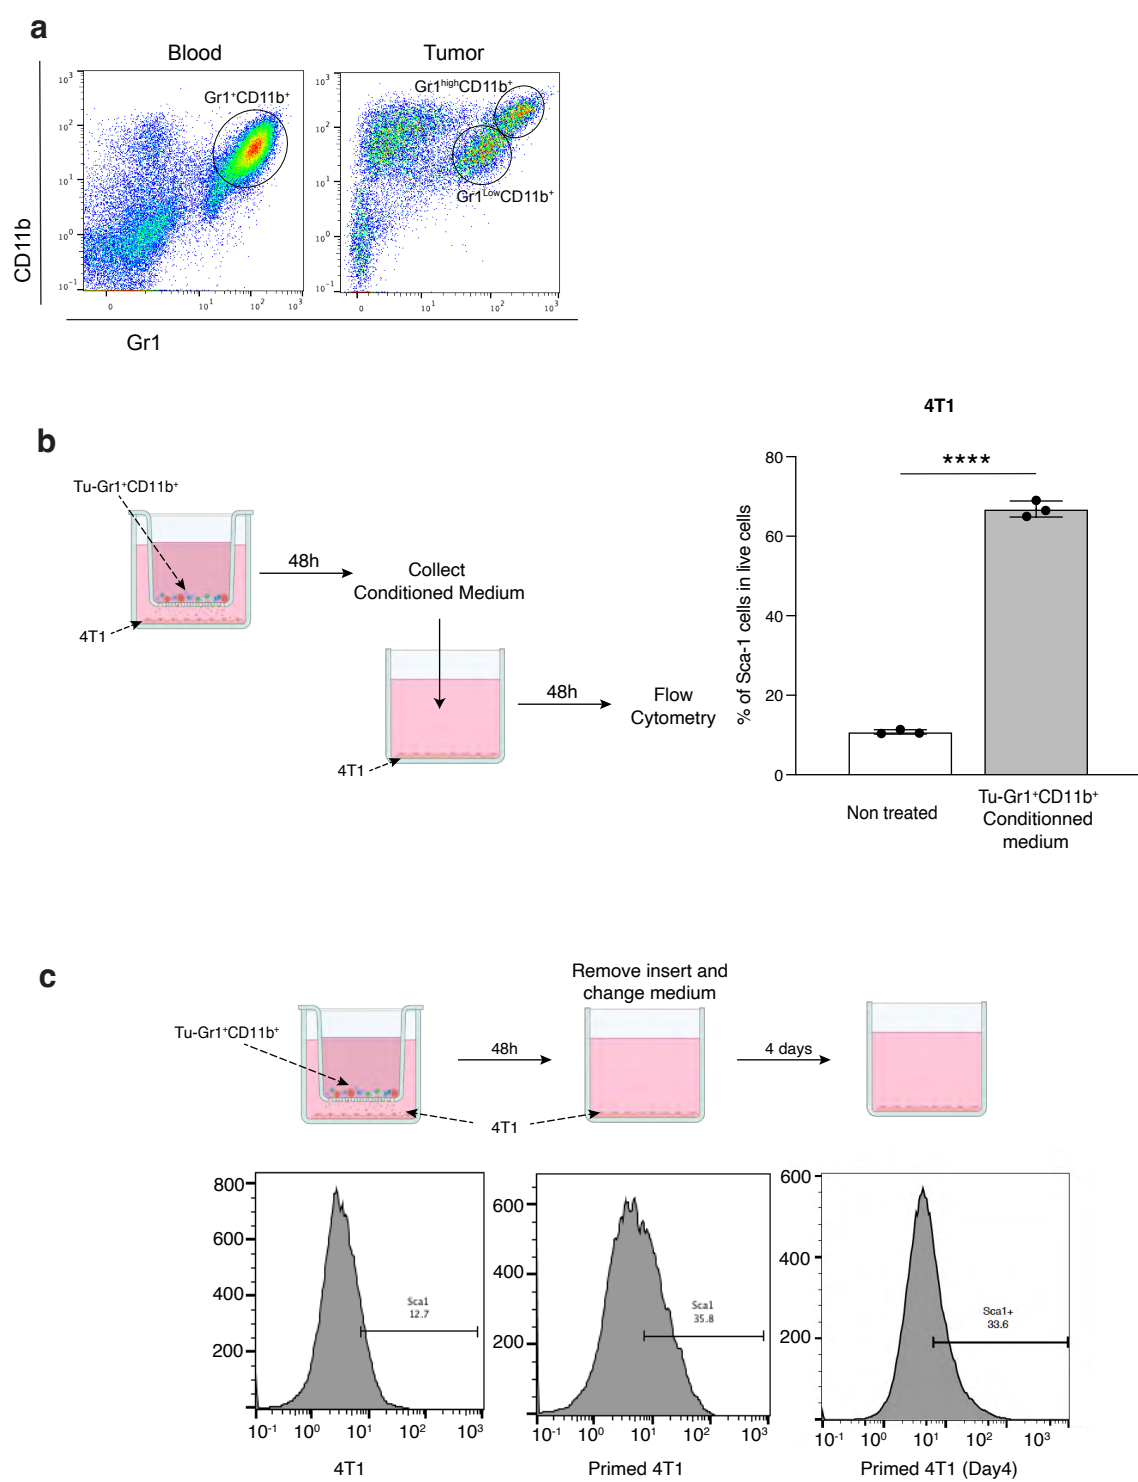

### **Supplementary Fig 3. Tu-Gr1<sup>+</sup>CD11b<sup>+</sup>-derived secreted factors promote the enrichment of Sca-1<sup>+</sup> population**

**(a)** Dot plots presenting Gr1<sup>+</sup>CD11b<sup>+</sup> subpopulations in Blood and Tumor site of 4T1 tumor-bearing mice.

**(b)** Abundance of the Sca-1<sup>+</sup> population in tumor cells cultured for 48 hours in the presence of medium collected from 4T1/Tu-Gr1<sup>+</sup>CD11b<sup>+</sup> cocultures (48 hours). Sca-1 expression on 4T1 cells was determined by flow cytometry.

**(c)** Sca-1 expression in parental 4T1 cells (left panel), 4T1 primed for 2 days with Gr1<sup>+</sup>CD11b<sup>+</sup> cells (middle panel) and cultured for 4 additional days in the absence of Gr1<sup>+</sup>CD11b<sup>+</sup> (right panel). Sca-1 expression was determined by flow cytometry.

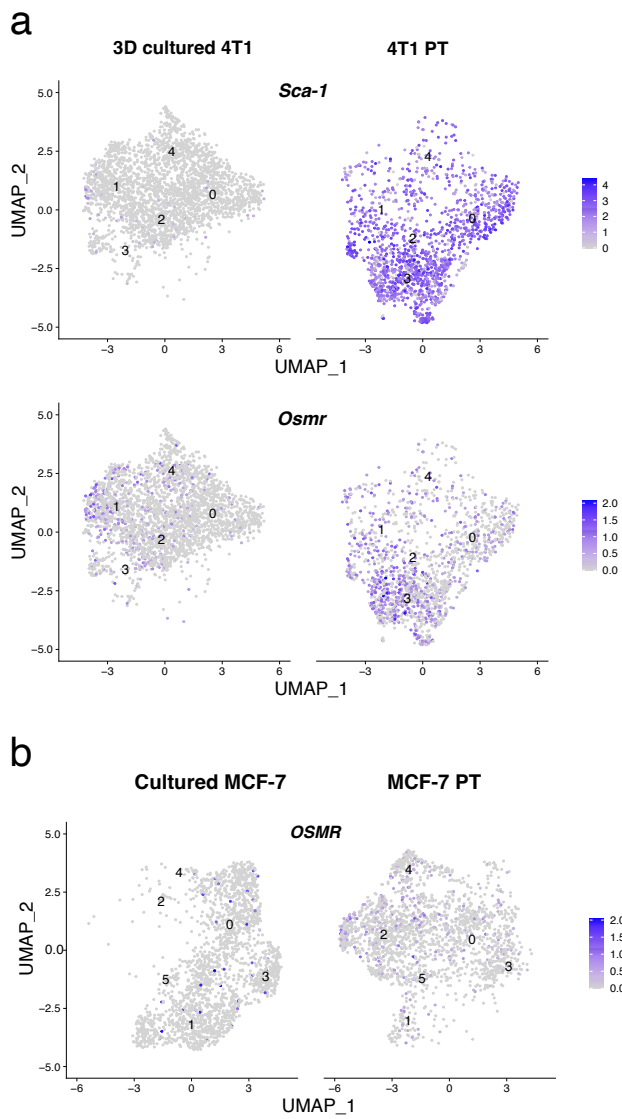

Supplementary Fig. 4

## **Supplementary Fig 4. TME expands the Sca1<sup>+</sup> population during *in vivo* tumor progression**

**(a)** UMAP plots showing the expression of *Sca-1* and *Osmr* in 4T1 tumor cells in 3D culture or primary tumors (PT). Analysis based on publicly available data (GSM4812003 and GSM3502134)

**(b)** UMAP plot showing the expression of *OSMR* in MCF-7 tumor cells in culture or primary tumors (PT). Analysis based on publicly available data (GSM4681765 and GSM5904917).

**a**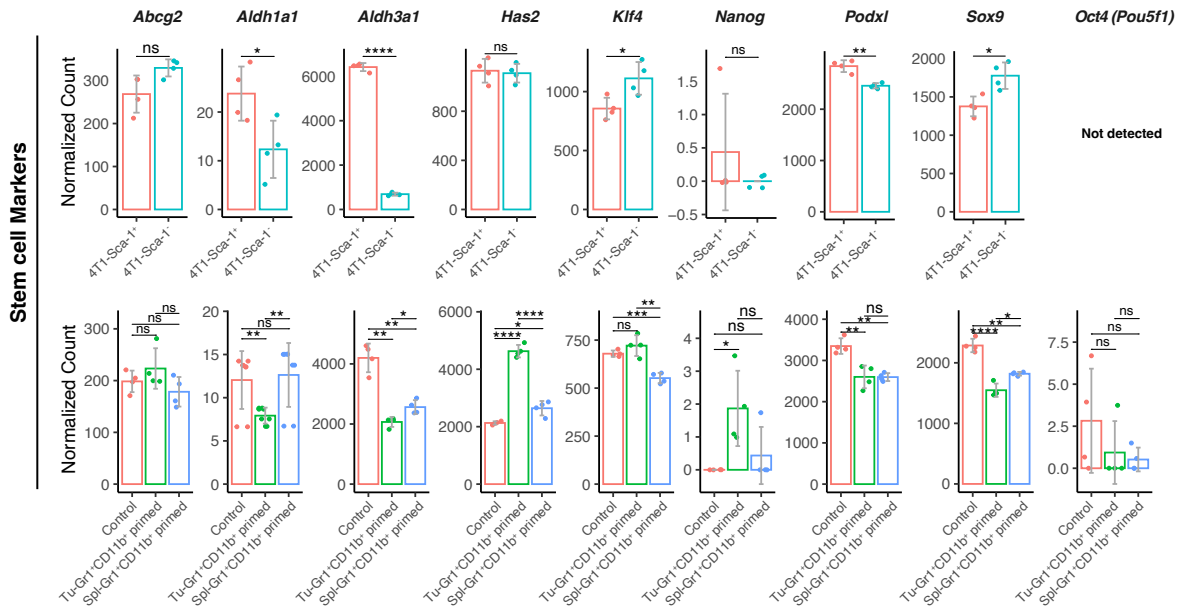**b**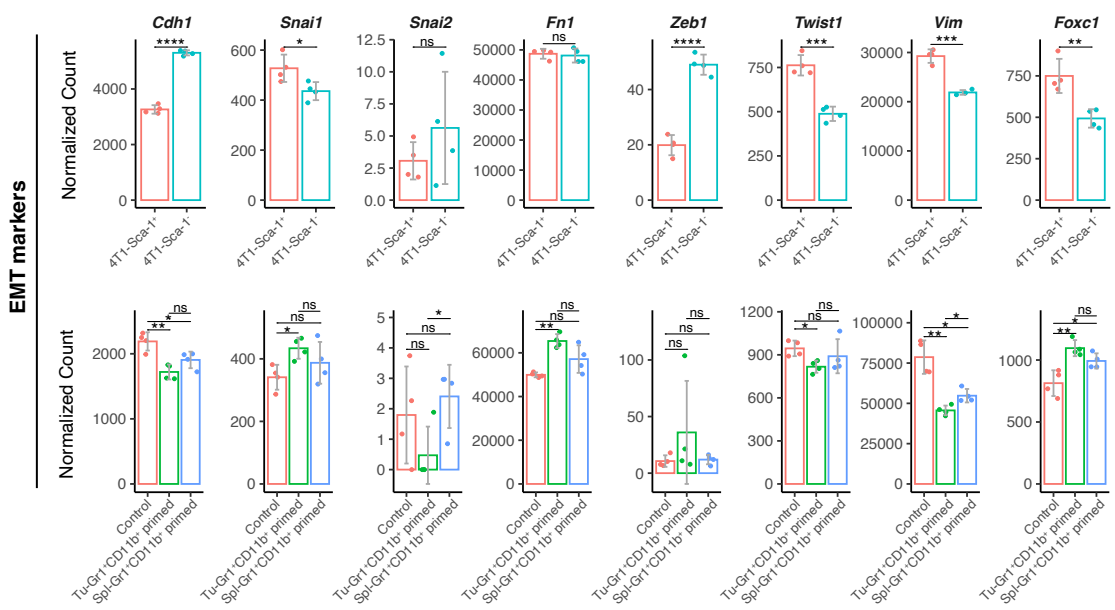

Supplementary Fig. 5

## **Supplementary Fig 5. Expression of selected stem cell/CSC and EMT genes in 4T1-Sca-1<sup>+</sup>, 4T1-Sca-1<sup>-</sup> and differently primed 4T1 cells**

Expression of stem cell markers **(a)** and EMT markers **(b)** in 4T1-Sca-1<sup>+</sup> cells, 4T1-Sca-1<sup>-</sup> cells, and parental, Tu-Gr1<sup>+</sup>CD11b<sup>+</sup>-educated, Spl-Gr1<sup>+</sup>CD11b<sup>+</sup>-educated 4T1 cells, as indicated.

Data represent mean values of RPKM  $\pm$  SD. \*,  $p < 0.05$ ; \*\*,  $p < 0.01$ ; \*\*\*,  $p < 0.001$ ; \*\*\*\*,  $p < 0.0001$  (unpaired two-tailed student's t test, and with Bonferroni correction for MDSC-educated 4T1 cells).

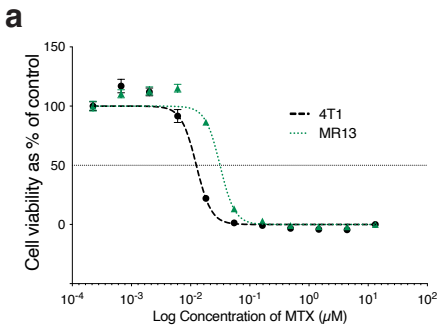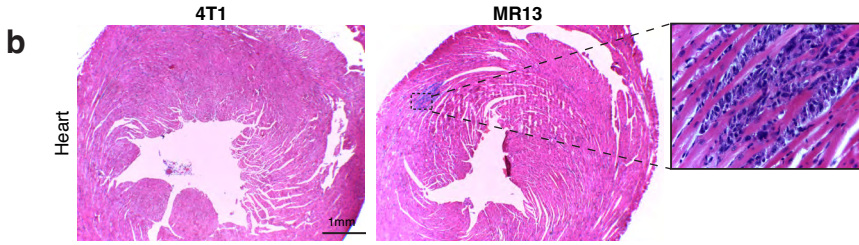

Supplementary Fig. 6



**Supplementary Fig 6. Sca-1<sup>+</sup> enriched 4T1 cells and MR13 cells are more resistant to chemotherapy drugs**

**(a)** Dose dependent effect of 48 hours treatment with MTX on 4T1 and MR13 cells' viability. IC<sub>50</sub> of MTX for 4T1 and MR13 are 12.5 nM and 31.4 nM respectively.

**(b)** Illustrative H&E stained heart sections of BALB/c mice 22 days post orthotopic injection with 4T1 cells (left) or MR13 cells (right and insert) (n=8-9/group).

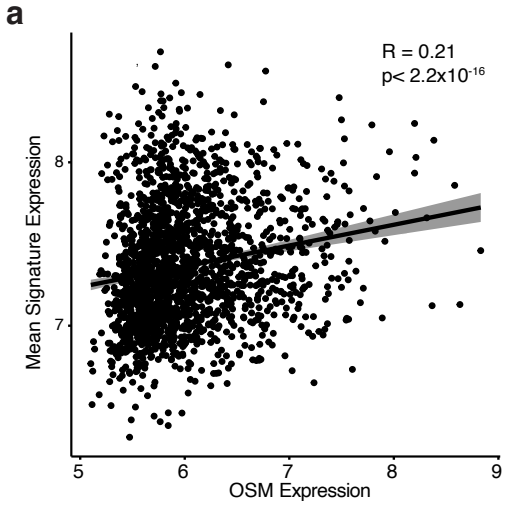

Supplementary Fig. 7

## **Supplementary Fig 7. Genes of the Tu-Gr1<sup>+</sup>CD11b<sup>+</sup>-induced signature and patients' outcome**

**(a)** Correlation of the orthologue 32 gene signature, based on the Tu-Gr1<sup>+</sup>CD11b<sup>+</sup> - induced signature, with *OSM* expression in the METABRIC datasets. Spearman's correlation coefficients and p-values are shown.
